# Supplementary material for: Gene Expression Profiles of Serous, Endometrioid, and Clear Cell Subtypes of Ovarian and Endometrial Cancer
Source: Oxford University Press journal article supplement (doi:10.1158/1078-0432.ccr-05-0508), 2005-09-15
Supplement: ccr_05-0508_master_gene_file.xls [file ccr_05-0508_master_gene_file.xls]

## Sheet: Comb_Ov_and_Endo_Hist_Gene_List
					Ovarian Histologies										Endometrial Histologies
					Distinguish Among Histologies				Distinguish Each Subtype from Other Histologies						Distinguish Among Histologies				Distinguish Each Subtype from Other Histologies
						Clear Cell	Endometrioid	Papillary Serous	Clear Cell		Endometrioid		Papillary Serous			Clear Cell	Endometrioid	Papillary Serous	Clear Cell		Endometrioid		Papillary Serous
Unique Gene ID	Name	Symbol	Locus Link ID	Cytoband	p-value	Average Ratio	Average Ratio	Average Ratio	F-test p-value	Fold Change	F-test p-value	Fold Change	F-test p-value	Fold Change	p-value	Average Ratio	Average Ratio	Average Ratio	F-test p-value	Fold Change	F-test p-value	Fold Change	F-test p-value	Fold Change
Hs.100724	peroxisome proliferative activated receptor, gamma	PPARG	5468	3p25	1.28e-05	1.26	0.71	0.72	1.82e-06	-1.75439
Hs.101047	transcription factor 3 (E2A immunoglobulin enhancer binding factors E12/E47)	TCF3	6929	19p13.3	5.13e-05	0.33	0.63	0.9	9.51e-05	2.15
Hs.101299	cullin 5	CUL5	8065	11q22-q23																	0.000579	-1.81818
Hs.101474	microtubule associated testis specific serine/threonine protein kinase	MAST205	23139	1p34.1																	0.000867	1.53
Hs.102122	insulin-like growth factor binding protein 1	IGFBP1	3484	7p13-p12	0.000152	0.05	0.02	0.02	2.52e-05	-3.125
Hs.10247	activated leukocyte cell adhesion molecule	ALCAM	214	3q13.1	4.5e-06	0.4	1.38	0.68	0.000135	2.74			4.58e-06	-2.5641
Hs.102482	mucin 5, subtype B, tracheobronchial	MUC5B	4587	11p15											0.00021	0.19	0.67	0.92	0.000558	3.67
Hs.103147	hypothetical protein FLJ21347	FLJ21347	64847	17q21.33	0.000335	2.14	1.24	1.33	7.04e-05	-1.69492
Hs.103989	DNA-binding transcriptional activator	NCYM	10408	2p24.1															0.000312	3.1
Hs.104349	ESTs, Moderately similar to hypothetical protein FLJ20489 [Homo sapiens] [H.sapiens]										0.000651	-1.49254
Hs.104627	Homo sapiens cDNA FLJ10158 fis, clone HEMBA1003463.								0.00022	-1.78571
Hs.106019	protein phosphatase 1, regulatory subunit 10	PPP1R10	5514	6p21.3																	0.00049	-1.6129
Hs.107	fibrinogen-like 1	FGL1	2267	8p22-p21.3							0.000806	1.52
Hs.107001	splicing factor (45kD)	SPF45	84991	10p15.1	0.000517	0.56	1.08	1.25	0.000137	2.03
Hs.107374	chromobox homolog 6	CBX6	23466	22q13.1					0.00079	-1.72414
Hs.107474	NGFI-A binding protein 1 (EGR1 binding protein 1)	NAB1	4664	2q32.3-q33	8.21e-05	1.05	1.84	2.17	3.01e-05	1.85					0.000543	1.68	1.42	0.93
Hs.10803	calcium and integrin binding 1 (calmyrin)	CIB1	10519	15q25.3-q26	0.000111	1	1.86	2.09	2.6e-05	1.93
Hs.108441	3-hydroxyanthranilate 3,4-dioxygenase	HAAO	23498	2p21					0.000477	-1.69492
Hs.108812	hypothetical protein FLJ22004	FLJ22004	80255	2q13	0.000691	1.85	1.14	0.95	0.000361	-1.72414
Hs.108957	ribosomal protein S27-like	RPS27L	51065	15q21.3							0.00029	1.59
Hs.109150	SH3-domain binding protein 5 (BTK-associated)	SH3BP5	9467	3p24.3									0.000803	-1.5625
Hs.109526	zinc finger protein 198	ZNF198	7750	13q11-q12	9.26e-07	0.76	0.81	1.33			1.41e-07	-1.66667
Hs.11039	MEP50 protein	MEP50	79084	1p13.1	2.56e-05	0.54	0.64	0.97			1.39e-05	-1.5873
Hs.11050	F-box only protein 9	FBXO9	26268	6p12.3-p11.2					0.000384	2.95
Hs.110826	trinucleotide repeat containing 9	TNRC9	27324	16q11.2															0.000323	3.18
Hs.111323	Msx-interacting-zinc finger	MIZ1	9063	18q21.1											4.07e-06	0.13	1.09	1.11	3.98e-07	8.66
Hs.111554	ADP-ribosylation factor-like 7	ARL7	10123	2q37.2	1.19e-08	0.48	2.11	2.3	1.33e-09	4.53
Hs.112158	Homo sapiens, Similar to hypothetical protein, MNCb-3350, clone IMAGE:5216914, mRNA				0.000696	0.59	1.43	2.01	0.000417	2.71
Hs.114309	apolipoprotein L, 1	APOL1	8542	22q13.1							0.000702	2.38
Hs.11493	Homo sapiens cDNA FLJ13536 fis, clone PLACE1006521.				6.42e-05	2.36	1.47	1	0.000515	-1.81818
Hs.115907	diacylglycerol kinase, delta 130kDa	DGKD	8527	2q37.1	0.000789	0.59	0.64	0.92			0.000204	-1.47059
Hs.116753	histone deacetylase 9	HDAC9	9734	7p21-p15					0.000793	2.34
Hs.118244	protein phosphatase 2, regulatory subunit B (B56), delta isoform	PPP2R5D	5528	6p21.1	0.000517	0.53	0.87	0.92	0.000106	1.66
Hs.118640	dishevelled, dsh homolog 2 (Drosophila)	DVL2	1856	17p13.2							0.000669	-1.40845
Hs.1189	E2F transcription factor 3	E2F3	1871	6p22					0.000301	2.06
Hs.119651	glypican 3	GPC3	2719	Xq26.1	0.000315	0.41	0.15	0.15	5.33e-05	-2.77778
Hs.121017	histone 1, H2ae	HIST1H2AE	3012	6p22.2-p21.1											0.000732	0.92	0.9	1.33			0.00013	-1.49254
Hs.12126	hepatocellular carcinoma-associated antigen 112	HCA112	55365	7q36.1	0.000597	0.55	0.43	2.1			0.000124	-4.54545
Hs.122607	B-cell CLL/lymphoma 9	BCL9	607	1q21											0.000508	0.3	0.84	1.23
Hs.12482	glyceronephosphate O-acyltransferase	GNPAT	8443	1q42.11-42.3	0.000375	0.37	0.56	0.73	0.000629	1.64
Hs.12773	nuclear receptor coactivator 6	NCOA6	23054	20q11	3.44e-05	0.99	1.28	1.75			0.000185	-1.47059
Hs.130838	argininosuccinate synthetase	ASS	445	9q34.1	6.71e-05	0.92	2.55	1.44	0.000504	2.32			5.57e-05	-2.17391
Hs.130881	ESTs																				0.000852	1.97
Hs.131592	estrogen receptor 1	ESR1	2099	6q25.1	0.000206	0.41	2.29	2.69	3.72e-05	5.88
Hs.132794	microphthalmia-associated transcription factor	MITF	4286	3p14.1-p12.3	6.72e-07	1.14	0.27	0.25	8.5e-08	-4.34783					1.31e-05	1.71	0.45	0.79					0.000115	2.16
Hs.13349	acyl-Coenzyme A oxidase 3, pristanoyl	ACOX3	8310	4p15.3																	0.000707	-1.47059
Hs.13377	ESTs																		0.000361	5.72
Hs.139033	B-cell CLL/lymphoma 11A (zinc finger protein)	BCL11A	53335	2p15	0.000869	0.23	0.83	1.46	0.000554	4.22
Hs.143198	ESTs																				0.000414	1.73
Hs.147989	phosphate cytidylyltransferase 1, choline, beta isoform	PCYT1B	9468	Xp22.12							0.000808	1.52
Hs.14799	neurofascin	NFASC	23114	1q32.1									0.000753	3.8
Hs.14894	abhydrolase domain containing 3	ABHD3	171586	18q11.1					0.000804	-1.85185
Hs.149894	paternally expressed 3	PEG3	5178	19q13.4					0.000868	-5
Hs.149923	inhibitor of growth family, member 3	ING3	54556	7q31									0.000516	-1.42857
Hs.1501	calcium channel, voltage-dependent, gamma subunit 1	CACNG1	786	17q24											0.000688	0.25	0.86	1.11
Hs.150540	KIAA0674 protein	KIAA0674	23307	9q32											7.11e-05	0.65	0.82	1.15			0.00079	-1.40845
Hs.15113	trans-golgi network protein 2	TGOLN2	10618	2p11.2	0.000902	1.83	1.66	1.07			0.000227	1.59
Hs.15119	mitochondrial translational initiation factor 2	MTIF2	4528	2p14-p16					0.000522	1.72
Hs.15125	X-box binding protein 1	XBP1	7494	22q12.1																	0.000233	-1.6129
Hs.151254	syndecan 2 (heparan sulfate proteoglycan 1, cell surface-associated, fibroglycan)	SDC2	6383	8q22-q23					0.000678	-3.57143
Hs.15164	hypothetical protein BC002942	BC002942	91289	22q13.33																	0.000524	-1.6129
Hs.151988	homogentisate 1,2-dioxygenase (homogentisate oxidase)	HGD	3081	3q21-q23	1.1e-05	1.76	0.56	0.62	1.73e-06	-3.0303
Hs.15220	KIAA1361 protein	KIAA1361	57551	17q11.1					0.000909	-1.63934
Hs.153479	hypothetical protein FLJ20699	FLJ20699	55020	22q13					0.000341	-1.51515
Hs.154084	kallikrein 7 (chymotryptic, stratum corneum)	KLK7	5650	19q13.33	7.83e-06	0.21	1.19	1.05	1.16e-06	5.56
Hs.154151	nuclear DNA-binding protein	C1D	10438	2p13-p12									0.000844	-1.35135	5.51e-05	1.36	0.98	0.54			0.000954	1.78
Hs.154365	mitogen-activated protein kinase kinase kinase 5	MAP3K5	4217	6q22.33	1.09e-05	3.11	1.81	1.34	2.85e-05	-1.88679					9.53e-06	2.64	1.09	1.36	0.000346	-1.85185
Hs.154846	zinc finger protein 106	ZFP106	64397	15q14	0.000685	0.9	1.29	0.79					0.000181	-1.53846
Hs.154890	extra spindle poles like 1 (S. cerevisiae)	ESPL1	9700	8									0.000656	2.62					1.87e-05	5.34
Hs.155024	phosphorylase, glycogen; muscle (McArdle syndrome, glycogen storage disease type V)	PYGM	5837	11q12-q13.2															0.000848	3.21
Hs.155119	protein tyrosine phosphatase, receptor type, M	PTPRM	5797	18p11.2	4.46e-06	1.82	0.64	0.71	7.02e-07	-2.77778
Hs.155470	E74-like factor 1 (ets domain transcription factor)	ELF1	1997	13q13	2.48e-05	0.89	1.38	0.62			0.000111	1.97	2.07e-05	-1.88679
Hs.155530	phosphatidylinositol 4-kinase, catalytic, beta polypeptide	PIK4CB	5298	1q21															0.000396	2.58
Hs.15589	fatty-acid-Coenzyme A ligase, long-chain 2	FACL2	2180	4q34-q35	0.000719	1.58	0.89	0.54
Hs.155979	B-cell CLL/lymphoma 6 (zinc finger protein 51)	BCL6	604	3q27	0.000143	1.8	3.92	3.28	4.63e-05	2.06
Hs.155981	EH-domain containing 1	EHD1	10938	11q13																	0.000401	-1.53846
Hs.15711	zinc finger protein 3 (A8-51)	ZNF3	7551	7q22.1					0.000392	1.43
Hs.157236	interferon, gamma-inducible protein 16	IFI16	3428	1q22	0.00017	0.49	1.07	0.42					3.23e-05	-2.38095
Hs.158309	PPAR binding protein	PPARBP	5469	17q12-q21.1											0.000389	0.93	0.81	1.37					0.000703	1.53
Hs.1592	KIAA0295 protein	KIAA0295	23060	15q22.1																	0.000495	-1.69492
Hs.159238	mesothelin	MSLN	10232	16p13.3					0.000811	2.61
Hs.159301	kinesin family member 13B	KIF13B	23303	8p12	0.000341	1.78	1.02	1.06	6.07e-05	-1.72414
Hs.159613	vesicle amine transport protein 1 homolog (T californica)	VAT1	10493	17q21	0.000775	1.02	0.66	0.59	0.000215	-1.6129
Hs.160786	homeo box D13	HOXD13	3239	2q31.1	7.72e-05	0.55	0.14	0.5					1.21e-05	3.63
Hs.164221	CDC16 cell division cycle 16 homolog (S. cerevisiae)	CDC16	8881	13q34	0.000831	0.33	0.56	0.64	0.000258	1.79
Hs.1657	protein tyrosine phosphatase, non-receptor type 14	PTPN14	5784	1q32.2											0.000105	0.26	0.88	1.12
Hs.166017	interleukin 18 receptor 1	IL18R1	8809	2q12							0.000986	-3.44828	4.41e-05	3.96
Hs.166891	regulatory factor X, 5 (influences HLA class II expression)	RFX5	5993	1q21					0.000623	2.15					2.73e-06	0.09	0.62	0.75	4.98e-06	7.01
Hs.169378	multiple PDZ domain protein	MPDZ	8777	9p24-p22											0.000574	0.12	0.65	0.99	0.000249	6.14
Hs.169407	SAC2 suppressor of actin mutations 2-like (yeast)	SACM2L	6293	6p21.3															0.000162	4.72
Hs.169487	v-maf musculoaponeurotic fibrosarcoma oncogene homolog B (avian)	MAFB	9935	20q11.2-q13.1					0.000468	2.33
Hs.170019	runt-related transcription factor 3	RUNX3	864	1p36	0.000568	0.4	0.66	0.38					0.000104	-1.72414
Hs.170177	Meis1, myeloid ecotropic viral integration site 1 homolog (mouse)	MEIS1	4211	2p14-p13	3.3e-06	1.57	7.39	10.26	8.74e-07	5.23
Hs.170328	moesin	MSN	4478	Xq11.2-q12							0.000347	1.96
Hs.171271	catenin (cadherin-associated protein), beta 1, 88kDa	CTNNB1	1499	3p21					0.000325	3.22
Hs.171683	nuclear receptor subfamily 1, group H, member 4	NR1H4	9971	12q23.1	6.11e-05	1.54	0.86	0.8	1.18e-05	-1.81818
Hs.171814	parathymosin	PTMS	5763	17q12-q22	0.000575	0.86	1.49	2.02	0.000589	1.91
Hs.171844	poliovirus receptor	PVR	5817	19q13.2					0.000208	-1.51515
Hs.1735	inhibin, beta B (activin AB beta polypeptide)	INHBB	3625	2cen-q13															5.39e-05	4.89
Hs.173894	colony stimulating factor 1 (macrophage)	CSF1	1435	1p21-p13											0.000763	0.48	0.86	1.07
Hs.176657	RAN binding protein 3	RANBP3	8498	19p13.3											7.12e-05	0.6	0.81	1.13			0.000255	-1.49254
Hs.178112	likely ortholog of mouse deleted in polyposis 1	DP1	7905	5q22-q23	0.00084	1.8	1.55	0.97			0.000265	1.66
Hs.178137	transducer of ERBB2, 1	TOB1	10140	17q21	1.28e-05	1.93	0.87	0.55	3.34e-05	-2.5641
Hs.179986	flotillin 1	FLOT1	10211	6p21.3	0.000207	0.66	1.69	1.78	3.53e-05	2.6
Hs.1802	major histocompatibility complex, class II, DO beta	HLA-DOB	3112	6p21.3											4.96e-06	0.14	1.37	1.46	5.81e-07	9.93
Hs.180295	ESTs								0.000914	1.41
Hs.180941	vacuolar protein sorting 41 (yeast)	VPS41	27072	7p14-p13					0.000749	-1.49254
Hs.181046	dual specificity phosphatase 3 (vaccinia virus phosphatase VH1-related)	DUSP3	1845	17q21					0.000574	-1.36986
Hs.181097	tumor necrosis factor (ligand) superfamily, member 4 (tax-transcriptionally activated glycoprotein 1, 34kDa)	TNFSF4	7292	1q25					0.000676	2.72
Hs.181307	H3 histone, family 3A	H3F3A	3020	1q41	3.43e-05	0.4	0.86	1.06	1.2e-05	2.31
Hs.181418	KIAA0152 gene product	KIAA0152	9761	12q24.31	0.00093	1.45	1.18	0.93
Hs.181768	potassium voltage-gated channel, Shaw-related subfamily, member 1	KCNC1	3746	11p15											7.81e-05	0.53	0.91	1.37			0.00027	-1.75439
Hs.183765	Homo sapiens cDNA FLJ14241 fis, clone OVARC1000533.														0.000712	2.49	0.72	0.75	0.00017	-3.33333
Hs.18573	acylphosphatase 1, erythrocyte (common) type	ACYP1	97	14q24.3	0.000685	0.26	0.47	0.58	0.000297	1.92
Hs.185973	degenerative spermatocyte homolog, lipid desaturase (Drosophila)	DEGS	8560	1q42.12	1.58e-06	1.81	1.21	0.78	0.000209	-1.72414	3.73e-05	1.73			0.000407	2.12	1.07	0.89
Hs.186419	EST																				0.000278	1.98
Hs.187266	ESTs																				0.000692	1.98
Hs.18844	hypothetical protein LOC255738	LOC255738	255738	1p32.2	0.000444	0.16	0.05	0.13					9.21e-05	2.72
Hs.18910	prostate cancer overexpressed gene 1	POV1	8501	11p11.2-p11.1											0.00091	0.16	0.82	1.24
Hs.194673	phosphoprotein enriched in astrocytes 15	PEA15	8682	1q21.1	2.88e-07	1.01	3.01	2.37	1.14e-07	2.78			0.000217	-1.85185
Hs.194703	adaptor-related protein complex 4, mu 1 subunit	AP4M1	9179	7q22.1											0.00072	0.62	0.77	1.14			4.86e-05	-1.63934
Hs.19520	FXYD domain containing ion transport regulator 2	FXYD2	486	11q23	3.95e-06	3.65	0.95	0.87	5.62e-07	-4					0.000391	3.54	0.94	1.07	8.77e-06	-3.33333
Hs.197540	hypoxia-inducible factor 1, alpha subunit (basic helix-loop-helix transcription factor)	HIF1A	3091	14q21-q24							0.000903	2.05
Hs.198135	ALFY	ALFY	23001	4q21.3	0.000239	1.8	1.49	1.24
Hs.198396	ATP-binding cassette, sub-family A (ABC1), member 4	ABCA4	24	1p22.1-p21							0.000514	-2.7027
Hs.19904	cystathionase (cystathionine gamma-lyase)	CTH	1491	1p31.1	8.94e-07	1.82	0.5	0.49	1.09e-07	-3.7037
Hs.199179	RAN binding protein 2	RANBP2	5903	2q12.3					0.000979	-1.72414
Hs.202095	empty spiracles homolog 2 (Drosophila)	EMX2	2018	10q26.1	0.000143	0.71	2.78	10.71
Hs.202234	ESTs																		8.57e-05	3.01
Hs.203195	EST														0.000595	1.68	1.62	0.74
Hs.206501	hypothetical protein from clone 643	LOC57228	57228	12q13.12											0.000201	0.09	0.58	0.83	3.98e-05	7.25
Hs.209214	ESTs												0.000792	2.34
Hs.20938	RNA binding motif, single stranded interacting protein 2	RBMS2	5939	12q13.13							0.000598	1.33
Hs.211592	protein kinase C, epsilon	PRKCE	5581	2p21																	0.000217	1.22
Hs.211933	collagen, type XIII, alpha 1	COL13A1	1305	10q22											0.000414	0.26	1.49	1.43
Hs.2128	dual specificity phosphatase 5	DUSP5	1847	10q25	2.11e-06	2.72	1.25	0.66	7.6e-05	-2.63158	0.000176	2.3
Hs.2133	retinal pigment epithelium-specific protein 65kDa	RPE65	6121	1p31											0.000175	0.19	1.39	1.89	4.11e-05	7.85
Hs.21415	hypothetical protein MGC39820	MGC39820	317649	3p14	0.00086	2.92	1.52	1.29	0.000246	-2.04082
Hs.223308	EST										0.000339	-2.85714
Hs.223347	EST								0.000824	1.82
Hs.226377	phosphate cytidylyltransferase 2, ethanolamine	PCYT2	5833	17q25.3											0.000611	0.25	0.79	0.91	0.000421	2.73
Hs.227133	apoptotic chromatin condensation inducer in the nucleus	ACINUS	22985	14q11.2	0.00041	0.97	0.97	1.38			7.06e-05	-1.42857
Hs.227789	mitogen-activated protein kinase-activated protein kinase 3	MAPKAPK3	7867	3p21.3	5.35e-05	0.83	0.62	0.56	2.74e-05	-1.38889
Hs.228059	tripartite motif-containing 28	TRIM28	10155	19q13.4											0.000432	0.23	0.86	1.68
Hs.229921	EST												0.000264	-2.38095
Hs.23131	kinesin family member C3	KIFC3	3801	16q13-q21					0.00069	-1.96078					0.000481	0.58	0.41	0.82					0.000181	1.86
Hs.234149	hypothetical protein FLJ20647	FLJ20647	55013	4q25	0.000532	1.06	1.74	1.03					9.49e-05	-1.66667
Hs.2363	potassium inwardly-rectifying channel, subfamily J, member 12	KCNJ12	3768	17p11.1	1.5e-05	1.12	2.01	1.99	2.12e-06	1.8
Hs.23642	protein predicted by clone 23627	HSU79266	29901	11q12.3	0.000827	0.63	1.13	1.49	0.000558	1.97
Hs.237617	dipeptidylpeptidase 9	DPP9	91039	19p13.3															0.000664	4.39
Hs.23889	SAM domain and HD domain 1	SAMHD1	25939	20pter-q12									0.000859	-1.63934
Hs.239752	nuclear receptor subfamily 2, group F, member 6	NR2F6	2063	19p13.1	6.29e-06	0.55	1.59	2.25	3.39e-06	3.23
Hs.241535	apolipoprotein L, 3	APOL3	80833	22q13.1							0.000835	2.33
Hs.24341	transcriptional co-activator with PDZ-binding motif (TAZ)	TAZ	25937	3q23-q24	0.000875	1.71	0.94	1.12	0.000386	-1.72414
Hs.245867	Homo sapiens, clone IMAGE:4865533, mRNA														0.000495	0.45	1.34	1.5
Hs.24678	sphingosine-1-phosphate phosphatase 1	SGPP1	81537	14q23.1	0.000252	0.99	0.52	0.39	0.000195	-2.08333
Hs.247362	dimethylarginine dimethylaminohydrolase 2	DDAH2	23564	6p21.3					0.000505	2.13
Hs.24950	regulator of G-protein signalling 5	RGS5	8490	1q23.1																	0.000759	-3.44828
Hs.250641	tropomyosin 4	TPM4	7171	19p13.1	0.000312	0.68	1.11	0.7					5.36e-05	-1.6129
Hs.250651	H factor 1 (complement)	HF1	3075	1q32							0.000631	1.65
Hs.250692	hepatic leukemia factor	HLF	3131	17q22	0.000275	0.37	0.08	0.06	5.34e-05	-5
Hs.250712	calcium channel, voltage-dependent, beta 3 subunit	CACNB3	784	12q13																	0.000805	-1.5873
Hs.25155	neuroepithelial cell transforming gene 1	NET1	10276	10p15	0.000613	0.58	1.15	0.96	0.000217	1.87
Hs.252280	Rho guanine nucleotide exchange factor (GEF) 1	ARHGEF1	9138	19q13.13																	6.55e-05	-1.85185
Hs.25277	ARF-GAP, RHO-GAP, ankyrin repeat and plekstrin homology domains-containing protein 3	ARAP3	64411	5q31.3	5.7e-05	0.77	1.14	1.47	0.000208	1.6
Hs.2558	bone gamma-carboxyglutamate (gla) protein (osteocalcin)	BGLAP	632	1q25-q31	0.000442	0.96	1.14	1.3
Hs.258	adenosine A3 receptor	ADORA3	140	1p21-p13											0.000423	0.19	1.25	1.61	0.000107	7.08
Hs.25925	hypothetical gene supported by AF038182; BC009203	LOC90355	90355	5q21.1					0.000251	2.73
Hs.26163	KIAA0649 gene product	KIAA0649	9858	9q34.3					0.000681	1.44
Hs.263395	sema domain, transmembrane domain (TM), and cytoplasmic domain, (semaphorin) 6A	SEMA6A	57556	5q23.1									0.000543	4.43
Hs.26492	beta-1,3-glucuronyltransferase 3 (glucuronosyltransferase I)	B3GAT3	26229	11q12.2																	0.000592	-1.28205
Hs.265827	interferon, alpha-inducible protein (clone IFI-6-16)	G1P3	2537	1p35															0.000368	4.18
Hs.26670	hypothetical protein MGC17330	MGC17330	113791	22q11.2-q22	0.000859	2.13	2.67	1.63			0.000758	1.54	0.000816	-1.44928
Hs.26675	ESTs										0.000444	-2.77778
Hs.267831	Rho GTPase activating protein 5	ARHGAP5	394	14q12									0.000343	-1.92308
Hs.268149	methyltransferase like 3	METTL3	56339	14q11.1	0.000311	0.27	0.59	0.74	0.00011	2.34
Hs.269386	ESTs																				0.000539	1.58
Hs.27323	ESTs														0.000948	2.14	1.79	0.93
Hs.274324	hypothetical protein FLJ11136	FLJ11136	55310	11q13.1							0.000824	1.27
Hs.275438	histone deacetylase 7A	HDAC7A	51564	12q13.1	0.000376	1.42	2.67	2.54	6.93e-05	1.85
Hs.276590	histidine ammonia-lyase	HAL	3034	12q22-q24.1									0.00094	2.86
Hs.278027	LIM domain kinase 2	LIMK2	3985	22q12.2									0.000439	-1.5873
Hs.278461	matrilin 3	MATN3	4148	2p24-p23	0.000836	0.3	0.12	0.29					0.000151	2.57
Hs.278613	interferon, alpha-inducible protein 27	IFI27	3429	14q32	0.000273	2.58	10.98	5.8	0.000427	3.48			0.000477	-2.7027
Hs.278675	bromodomain containing 4	BRD4	23476	19p13.1	1.24e-05	1.03	1.77	1.44	2.13e-05	1.62			0.000106	-1.42857
Hs.278896	UDP glycosyltransferase 1 family, polypeptide A1	UGT1A1	54658	2q37	0.000362	3.18	0.71	1.21	0.000267	-3.84615					0.000871	7	1.39	1.09	0.000645	-4.16667
Hs.280387	Homo sapiens, clone IMAGE:4753714, mRNA																				0.000877	1.5
Hs.281866	ATPase, H+ transporting, lysosomal 70kDa, V1 subunit A, isoform 1	ATP6V1A1	523	3q13.2	0.000372	1.28	0.78	0.65	0.00017	-1.72414
Hs.283072	Homo sapiens cDNA FLJ23636 fis, clone CAS07176.																				0.000299	2.05
Hs.283609	muscleblind-like 2 (Drosophila)	MBNL2	10150	13q32.1											0.000191	0.15	0.8	1.15	0.000101	6.01
Hs.284291	sorting nexin 6	SNX6	58533	14q12									0.000449	-1.31579							0.000767	1.36
Hs.284394	complement component 3	C3	718	19p13.3-p13.2	0.000291	0.57	2.6	0.49					5.02e-05	-5
Hs.285115	interleukin 13 receptor, alpha 1	IL13RA1	3597	Xq24	0.000575	1.34	2.1	1.33					0.000102	-1.5625
Hs.286055	chimerin (chimaerin) 2	CHN2	1124	7p15.3									0.000354	2.27
Hs.286148	stromal antigen 1	STAG1	10274	3q22.2											0.000686	1.42	1.38	0.96			9.72e-05	1.48
Hs.288319	squamous cell carcinoma antigen recognised by T cells	SART1	9092	11q13.1																	0.000299	-1.66667
Hs.288512	chromosome X open reading frame 10	CXorf10	93949	Xq26																	0.000173	1.7
Hs.28853	CDC7 cell division cycle 7-like 1 (S. cerevisiae)	CDC7L1	8317	1p22															0.000591	4.09
Hs.28988	glutaredoxin (thioltransferase)	GLRX	2745	5q14	1.94e-08	1.93	0.51	0.32	3.14e-08	-4.34783					9.83e-05	1.71	0.46	0.49	5.29e-05	-3.0303
Hs.290347	Homo sapiens, clone IMAGE:5298708, mRNA										0.000278	-4.7619
Hs.292057	hypothetical protein LOC222136	LOC222136	222136	7p14.3					0.000291	1.47
Hs.292375	chondroitin 4-O-sulfotransferase 3	C4ST3	166012	3q21.2																	0.00042	2.79
Hs.29279	eyes absent homolog 2 (Drosophila)	EYA2	2139	20q13.1	0.000401	1.74	7.77	8.98	7.6e-05	4.67
Hs.29286	hypothetical protein LOC201514	LOC201514	201514	19q13.43															0.000328	2.7
Hs.294122	KIAA1805 protein	KIAA1805	84450	2p23	0.00019	0.75	1.27	1.48	6.9e-05	1.77
Hs.295944	tissue factor pathway inhibitor 2	TFPI2	7980	7q22	5.21e-07	0.66	0.24	0.13	5.62e-06	-3.33333	0.00044	2.49							5.73e-06	-7.69231
Hs.296323	serum/glucocorticoid regulated kinase	SGK	6446	6q23	8.57e-06	0.95	0.37	0.19	6.75e-05	-3.125	0.00066	2.56
Hs.296776	regulatory factor X-associated ankyrin-containing protein	RFXANK	8625	19p12					0.00023	1.84
Hs.2979	trefoil factor 2 (spasmolytic protein 1)	TFF2	7032	21q22.3															6.45e-05	6.44
Hs.29802	slit homolog 2 (Drosophila)	SLIT2	9353	4p15.2	0.000729	0.7	2.17	2.33	0.000136	3.17
Hs.29878	KIAA0335 gene product	KIAA0335	9849	10q23.33									0.00098	1.64
Hs.300592	v-myb myeloblastosis viral oncogene homolog (avian)-like 1	MYBL1	4603	8q22																	0.000313	1.92
Hs.301094	KIAA0326 protein	KIAA0326	23361	16p11.2	8.24e-05	0.86	1.2	1.33	3.3e-05	1.45
Hs.301152	hypothetical protein MGC50452	MGC50452	89932	14q24.1	5.6e-07	5.46	1.54	1.33	8.93e-08	-3.7037
Hs.301183	molecule possessing ankyrin repeats induced by lipopolysaccharide (MAIL), homolog of mouse	MAIL	64332	3p12-q12	2.9e-05	3.84	1.64	0.79	0.000305	-2.94118	0.000609	2.61
Hs.301372	hypothetical protein DKFZp761A132	DKFZp761A132	84256	16p13.3	0.000289	1.41	0.93	0.93	4.86e-05	-1.51515
Hs.301373	ubiquitin specific protease 19	USP19	10869	3p21.31	0.000335	0.88	1.01	1.4			0.000173	-1.42857
Hs.302498	RAB40B, member RAS oncogene family	RAB40B	10966	17q25.3							0.000378	1.45
Hs.30687	GRB2-associated binding protein 2	GAB2	9846	11q13.3					0.000309	2.78
Hs.30738	hypothetical protein FLJ10407	FLJ10407	55706	1p32.3											0.000269	0.91	0.68	0.41			0.000577	1.7
Hs.30965	neuronal Shc adaptor homolog	SLI	25759	19p13.3																	0.00061	-1.44928
Hs.30977	Homo sapiens cDNA FLJ31513 fis, clone NT2RI1000127.				3.05e-05	1.87	1.21	0.93	8.28e-05	-1.69492
Hs.311609	DEAD/H (Asp-Glu-Ala-Asp/His) box polypeptide 39	DDX39	10212	19p13.12					0.000753	1.73
Hs.3132	steroidogenic acute regulatory protein	STAR	6770	8p11.2	0.00045	1.86	0.58	0.74	0.000129	-3.0303
Hs.31422	hypothetical protein LOC92597	LOC92597	92597	4q13.3	2.98e-07	2.15	0.95	0.73	2.48e-07	-2.43902
Hs.318751	a disintegrin-like and metalloprotease (reprolysin type) with thrombospondin type 1 motif, 9	ADAMTS9	56999	3p14.3-p14.2	1.34e-05	6.54	1.39	1.63	2.25e-06	-4.54545
Hs.322710	ESTs												0.000817	-1.6129
Hs.323817	DKFZP547E1010 protein	DKFZP547E1010	26097	1q21.3					0.000737	1.59
Hs.324746	alpha-2-HS-glycoprotein	AHSG	197	3q27							0.00077	1.68
Hs.326159	leucine rich repeat (in FLII) interacting protein 1	LRRFIP1	9208	2q37.3											0.000353	0.8	1	1.74
Hs.328039	EST, Moderately similar to S18382 surfactant protein C - human (fragment) [H.sapiens]														0.000374	1.77	1.84	0.78
Hs.329126	EST, Weakly similar to PRP1_HUMAN Salivary proline-rich protein precursor (Clones CP3, CP4 and CP5) [Contains: Basic peptide IB-6; Peptide P-H] [H.sapiens]														0.000301	4.52	1.76	1.31
Hs.33026	hypothetical protein PP2447	PP2447	80305	22q13.33											0.000582	0.28	0.68	0.96
Hs.334455	tryptase, alpha	TPS1	7176	16p13.3															6.12e-05	-1.69492
Hs.334841	selenium binding protein 1	SELENBP1	8991	1q21-q22					0.000762	2.38
Hs.336916	death-associated protein 6	DAXX	1616	6p21.3					0.000541	1.55
Hs.33829	basic helix-loop-helix domain containing, class B, 3	BHLHB3	79365	12p11.23-p12.1	9.64e-05	1	2.08	1.75	3.15e-05	1.97					0.000552	1.55	1.52	0.9			4.13e-05	1.75
Hs.33922	hypothetical protein MGC9084	MGC9084	92342	1q23.2	0.000113	0.73	1.14	0.9	0.000611	1.44			9.71e-05	-1.38889
Hs.3454	rab11-family interacting protein 4	RAB11-FIP4	84440		0.000331	0.74	1.17	2.2			0.000504	-2.12766
Hs.345728	suppressor of cytokine signaling 3	SOCS3	9021	17q25.3	0.000608	2.6	2.04	1.35			0.00051	1.62
Hs.34790	Homo sapiens, clone IMAGE:5303153, mRNA										0.000744	-1.40845
Hs.349227	muscle RAS oncogene homolog	MRAS	22808	3q22.3	0.000249	2.6	1.75	1.72	4.25e-05	-1.49254
Hs.351201	Homo sapiens, clone IMAGE:4106329, mRNA																				0.00096	1.82
Hs.351612	vacuolar proton-ATPase subunit	LOC155066	155066	7q36.1											0.000857	0.37	0.67	0.96
Hs.352	folate receptor 3 (gamma)	FOLR3	2352	11q13											7.38e-06	0.14	0.85	1.15	0.000211	4.15
Hs.352535	KIAA0943 protein	Apg4B	23192	2q37.3															0.000639	3.22
Hs.355816	conserved gene amplified in osteosarcoma	OS4	10106	12q13-q15															0.000584	2.65
Hs.355841	Homo sapiens, clone IMAGE:5171832, mRNA				0.000246	0.41	1.04	1.4	9.12e-05	2.83
Hs.356358	hypothetical protein BC014311	LOC115548	115548	5q13.1	0.000116	2.32	1.77	1.29			0.000385	1.48
Hs.356523	mitogen-activated protein kinase 8 interacting protein 2	MAPK8IP2	23542	22q13.33	2.1e-06	1.93	1.15	1.18	2.79e-07	-1.66667
Hs.356807	oxysterol binding protein-like 11	OSBPL11	114885	3q21							0.000746	1.39
Hs.36102	metallothionein 1B (functional)	MT1B	4490	16q13							0.00095	1.85
Hs.364762	ESTs				0.000884	4.78	2.61	2.31	0.000223	-1.92308
Hs.365649	ESTs																		0.000862	3.25
Hs.367697	nucleoporin 50kDa	NUP50	10762	22q13.31					0.000923	-2.5641
Hs.372651	hypothetical protein MGC29643	MGC29643	116372	2q21.1					0.000374	3.28
Hs.372924	androgen-induced basic leucine zipper	AIBZIP	148327	1q21.3	2.26e-05	0.76	0.94	1.49			1.59e-05	-1.69492
Hs.372944	ESTs																				0.000482	1.72
Hs.380230	thyroid hormone receptor interactor 6	TRIP6	7205	7q22	0.000103	0.69	1.44	1.06	0.000155	1.91			0.000306	-1.63934
Hs.380430	ATP-dependent RNA helicase	ROK1	11056	17q21.1	0.000916	2.29	1.34	1.29	0.000172	-1.72414
Hs.380950	ESTs, Highly similar to HMG1_HUMAN High mobility group protein 1 (HMG-1) [H.sapiens]												0.000597	-1.6129
Hs.381218	cytochrome b5 outer mitochondrial membrane precursor	CYB5-M	80777	16q22.1	0.000995	0.69	0.55	0.46
Hs.3844	LIM domain only 4	LMO4	8543	1p22.3	0.000201	1.22	2.51	2.42	3.4e-05	2.04
Hs.388018	EST				0.000547	3.06	2.69	1.55			0.000137	1.79
Hs.388842	chromosome 21 open reading frame 2	C21orf2	755	21q22.3											0.000102	0.19	0.97	1.29	0.000936	3.6
Hs.389357	EST										0.000225	-1.40845
Hs.405465	integrin beta 3 binding protein (beta3-endonexin)	ITGB3BP	23421	1p31.3											6.27e-05	0.82	0.74	0.53			1.7e-05	1.41
Hs.405949	Homo sapiens, clone IMAGE:3458340, mRNA																						0.000511	-4.7619047619
Hs.405961	old astrocyte specifically induced substance	OASIS	90993	11p11.12																	7.35e-05	-2.38095
Hs.406268	KIAA1922 protein	KIAA1922	114819	1p36.13	0.000446	0.65	0.26	0.27	7.87e-05	-2.5									4.9e-05	-2.7027
Hs.414877	EST								0.000922	-1.25
Hs.41587	RAD50 homolog (S. cerevisiae)	RAD50	10111	5q31											0.000516	0.5	0.76	1.16
Hs.419094	protease, serine, 1 (trypsin 1)	PRSS1	5644	7q34					0.000927	1.8
Hs.42235	ESTs, Weakly similar to hypothetical protein FLJ20489 [Homo sapiens] [H.sapiens]												0.000666	4.85
Hs.423190	cysteine-rich protein 1 (intestinal)	CRIP1	1396	7q11.23	1.3e-05	0.58	3.88	2.84	2.93e-06	6.08
Hs.42911	TAF13 RNA polymerase II, TATA box binding protei (TBP)-associated factor, 18kDa	TAF13	6884	1p13.1											0.000113	1.52	0.73	0.8	1.93e-05	-2
Hs.429506	NADH dehydrogenase (ubiquinone) Fe-S protein 3, 30kDa (NADH-coenzyme Q reductase)	NDUFS3	4722	11p11.11	0.000111	0.49	0.76	0.95	0.000139	1.66
Hs.432605	UDP-glucose ceramide glucosyltransferase	UGCG	7357	9q31							0.000488	1.45
Hs.433201	CDK2-associated protein 1	CDK2AP1	8099	12q24.31					0.000322	2.27
Hs.433205	metallothionein 1E (functional)	MT1E	4493	16q13	6.16e-05	1.55	1.84	0.74			1.41e-05	2.39
Hs.433230	splicing factor 3a, subunit 1, 120kDa	SF3A1	10291	22q12.2																	3.64e-05	-2.94118	3.64e-005	2.97
Hs.433504	nuclear factor I/C (CCAAT-binding transcription factor)	NFIC	4782	19p13.3											0.000268	0.23	0.63	0.98
Hs.434102	high-mobility group (nonhistone chromosomal) protein 1-like 10	HMG1L10	27126	22	0.000206	1.39	0.37	0.98					5.43e-05	3.08
Hs.434824	Homo sapiens, clone IMAGE:5304065, mRNA								0.000965	1.63
Hs.435470	ESTs, Weakly similar to hypothetical protein FLJ13241 [Homo sapiens] [H.sapiens]														0.000451	1.71	1.99	0.72			7.9e-05	2.65
Hs.435693	ESTs														0.000279	2.3	2.23	0.8			3.5e-05	2.82
Hs.437607	ESTs				0.000556	0.34	0.23	0.73			0.00025	-2.85714
Hs.463	potassium inwardly-rectifying channel, subfamily J, member 1	KCNJ1	3758	11q24	5.07e-05	0.39	0.33	1.35			8.23e-06	-3.84615
Hs.46638	chromosome 11 open reading frame 8	C11orf8	744	11p13	0.000847	0.51	1.59	2.52	0.000451	3.61											0.000226	-2.27273
Hs.46914	Homo sapiens, clone IMAGE:4661943, mRNA, partial cds										0.000325	1.43
Hs.47061	unc-51-like kinase 1 (C. elegans)	ULK1	8408	12q24.3											0.000603	0.28	0.46	0.69
Hs.479	RAB5C, member RAS oncogene family	RAB5C	5878	17q21.2	0.000263	1.52	1	0.85	0.000149	-1.5873
Hs.48943	ESTs																				0.000988	2.07
Hs.4975	potassium voltage-gated channel, KQT-like subfamily, member 2	KCNQ2	3785	20q13.3	0.000129	1.1	0.42	0.5	3.39e-05	-2.5
Hs.50649	quinone oxidoreductase homolog	PIG3	9540	2p24.1	0.000582	0.79	1.61	1.86	0.000149	2.13
Hs.50785	SEC22 vesicle trafficking protein-like 1 (S. cerevisiae)	SEC22L1	9554	1q21.2-q21.3									0.000592	-1.38889
Hs.530	collagen, type IV, alpha 3 (Goodpasture antigen)	COL4A3	1285	2q36-q37	9.85e-06	3.64	0.37	0.62	3.41e-06	-8.33333			0.000666	3.93
Hs.56205	insulin induced gene 1	INSIG1	3638	7q36																	0.000726	-1.85185
Hs.57691	cadherin 18, type 2	CDH18	1016	5p15.2-p15.1							0.000611	-4.16667
Hs.57729	Kelch-like ECH-associated protein 1	KEAP1	9817	19p13.2					0.000899	1.58
Hs.57847	Homo sapiens mRNA; cDNA DKFZp667O0320 (from clone DKFZp667O0320)										0.000962	1.37
Hs.6168	KIAA0703 gene product	KIAA0703	9914	16q23.3											0.000861	0.34	0.98	1.33
Hs.621	lectin, galactoside-binding, soluble, 3 (galectin 3)	LGALS3	3958	14q21-q22	1.03e-05	1.4	0.81	0.27			1.06e-05	3.51
Hs.62192	coagulation factor III (thromboplastin, tissue factor)	F3	2152	1p22-p21					0.000293	-3.0303
Hs.62595	chromosome 9 open reading frame 9	C9orf9	11092	9q34							0.000617	-3.0303
Hs.62914	ESTs												0.000581	2.09
Hs.64056	p21/Cdc42/Rac1-activated kinase 1 (STE20 homolog, yeast)	PAK1	5058	11q13-q14											2.4e-06	0.18	1.16	1.55	4.57e-05	4.51
Hs.6454	regulator of G-protein signalling 19 interacting protein 1	RGS19IP1	10755	19p13.1					0.000406	1.79
Hs.65641	hypothetical protein FLJ20073	FLJ20073	54809	7q21.2									0.000547	-1.51515
Hs.6603	hypothetical protein FLJ20296	FLJ20296	54884	2p11.2	0.000638	0.46	0.85	0.46					0.000113	-1.85185
Hs.662	cerebellin 1 precursor	CBLN1	869	16q11.2									0.000599	2.54
Hs.6906	v-ral simian leukemia viral oncogene homolog A (ras related)	RALA	5898	7p22-p15									0.000312	-1.40845
Hs.69771	B-factor, properdin	BF	629	6p21.3	0.000524	1.32	6.75	3.55	0.000481	4.19
Hs.70499	ecotropic viral integration site 2A	EVI2A	2123	17q11.2	0.000324	0.38	0.76	0.54	0.000664	1.81			0.000402	-1.63934
Hs.70604	hypothetical protein LOC283904	LOC283904	283904	16q24.1					0.000438	2.38
Hs.71574	tigger transposable element derived 5	TIGD5	84948	8q24.3	0.000623	0.56	0.82	0.96	0.000355	1.54
Hs.71818	copine VIII	LOC144402	144402	12q11	0.000521	2.15	1.31	1.18	0.000137	-1.69492
Hs.72160	AND-1 protein	AND-1	11169	14q22.1															0.00048	4.57
Hs.72887	defensin, alpha 5, Paneth cell-specific	DEFA5	1670	8pter-p21							0.000686	-2.7027
Hs.73737	splicing factor, arginine/serine-rich 1 (splicing factor 2, alternate splicing factor)	SFRS1	6426	17q21.3-q22							0.000422	-1.53846
Hs.73818	ubiquinol-cytochrome c reductase hinge protein	UQCRH	7388	1p33					0.00042	3.94
Hs.74131	arylsulfatase E (chondrodysplasia punctata 1)	ARSE	415	Xp22.3	3.72e-08	1.98	0.67	0.67	3.9e-09	-2.94118
Hs.74266	hypothetical protein MGC4251	MGC4251	84336	17q21.31															0.000443	-1.75439
Hs.74870	H2.0-like homeo box 1 (Drosophila)	HLX1	3142	1q41-q42.1											0.000643	0.77	0.89	1.39			2.88e-05	-1.69492
Hs.75110	cannabinoid receptor 1 (brain)	CNR1	1268	6q14-q15	0.000171	0.5	0.28	1.27			0.000102	-3.84615	0.000459	3.16
Hs.75113	general transcription factor IIIA	GTF3A	2971	13q12.3-q13.1					0.000596	2
Hs.75149	SH3-domain GRB2-like 2	SH3GL2	6456	9p22	0.000707	0.66	0.34	1.29			0.00093	-3.0303	0.000653	2.83
Hs.75183	cytochrome P450, family 2, subfamily E, polypeptide 1	CYP2E1	1571	10q24.3-qter	0.000715	1.26	0.97	2.09			0.000318	-2
Hs.75196	HLA-B associated transcript 8	BAT8	10919	6p21.31	0.000354	0.86	1.09	1.56			0.000495	-1.51515
Hs.75353	inositol polyphosphate-5-phosphatase, 72kDa	INPP5E	23203	9q34.3											0.000785	0.39	0.51	0.65			0.000912	-1.36986
Hs.75873	zyxin	ZYX	7791	7q32	0.000222	0.89	2.08	1.52	0.000194	2.12			0.000865	-1.75439
Hs.76205	cytochrome P450, family 11, subfamily A, polypeptide 1	CYP11A1	1583	15q23-q24	0.000444	1.77	1.09	1.27	0.000227	-1.53846
Hs.76272	retinoblastoma binding protein 2	RBBP2	5927	12p11	0.000843	0.8	1.33	1.42	0.000173	1.7
Hs.76392	aldehyde dehydrogenase 1 family, member A1	ALDH1A1	216	9q21.13					0.000673	-2.5641
Hs.76730	MDN1, midasin homolog (yeast)	MDN1	23195	6q15					0.000651	-1.35135
Hs.76917	F-box only protein 8	FBXO8	26269	4q34.1	0.000624	1.77	0.65	0.63	0.000112	-2.77778
Hs.76918	Niemann-Pick disease, type C1	NPC1	4864	18q11-q12	0.00029	0.86	0.53	0.54	4.87e-05	-1.6129
Hs.77152	MCM7 minichromosome maintenance deficient 7 (S. cerevisiae)	MCM7	4176	7q21.3-q22.1	0.000275	0.24	0.37	0.47	0.000404	1.63
Hs.77196	spectrin, alpha, non-erythrocytic 1 (alpha-fodrin)	SPTAN1	6709	9q33-q34	0.000776	0.8	1.38	1.55	0.000205	1.79
Hs.77269	guanine nucleotide binding protein (G protein), alpha inhibiting activity polypeptide 2	GNAI2	2771	3p21	0.000169	1.08	1.85	1.12					2.83e-05	-1.66667
Hs.77271	protein kinase, cAMP-dependent, catalytic, alpha	PRKACA	5566	19p13.1																	0.000856	-1.5625
Hs.77311	BTG family, member 3	BTG3	10950	21q21.1-q21.2	5.51e-06	0.35	1.17	0.95	1.29e-06	3.15
Hs.77326	insulin-like growth factor binding protein 3	IGFBP3	3486	7p13-p12	0.000262	0.39	0.2	0.17	8.12e-05	-2.04082
Hs.77575	dolichyl-p-mannose:Man7GlcNAc2-PP-dolichyl mannosyltransferase	ALG12	79087		4.78e-06	2.11	1.15	0.98	1.71e-06	-1.92308
Hs.77617	nuclear antigen Sp100	SP100	6672	2q37.1	0.0004	1.15	1.36	0.8			0.000158	1.62
Hs.77840	annexin A4	ANXA4	307	2p13	3.64e-06	2.78	0.65	0.46	1.12e-06	-4.7619					0.000409	1.67	0.28	0.47	0.000198	-4.34783
Hs.78061	transcription factor 21	TCF21	6943	6pter-qter	0.000267	4.33	2.32	1.79	0.000165	-2.04082
Hs.78089	ATPase, H+ transporting, lysosomal 14kDa, V1 subunit F	ATP6V1F	9296	7q32					0.000269	1.63
Hs.78403	small nuclear RNA activating complex, polypeptide 2, 45kDa	SNAPC2	6618	19p13.3-p13.2	0.000807	0.44	0.88	0.91	0.00015	2.02
Hs.79022	GTP binding protein overexpressed in skeletal muscle	GEM	2669	8q13-q21					0.000294	-2.77778
Hs.79187	coxsackie virus and adenovirus receptor	CXADR	1525	21q21.1	8.62e-05	0.15	0.81	0.78	1.35e-05	5.43									0.000118	5.17
Hs.79353	transcription factor Dp-1	TFDP1	7027	13q34									0.000968	-1.47059
Hs.79507	KIAA0582 protein	KIAA0582	23177	2p13.3									0.000763	-1.38889
Hs.79516	brain abundant, membrane attached signal protein 1	BASP1	10409	5p15.1-p14									0.000622	2.83
Hs.7977	SLIT-ROBO Rho GTPase activating protein 2	SRGAP2	9901	3p25.3	2.44e-05	1.1	2.34	3.08	1.54e-05	2.32
Hs.80248	RNA binding protein with multiple splicing	RBPMS	11030	8p12-p11					0.000477	-2.94118
Hs.8025	angiopoietin-like 2	ANGPTL2	23452	9q34					0.000842	-2.22222
Hs.80343	matrix metalloproteinase 15 (membrane-inserted)	MMP15	4324	16q13-q21									0.000681	-1.92308
Hs.8038	ESTs																		0.000257	3.4
Hs.80768	chloride channel 7	CLCN7	1186	16p13											0.000189	0.61	0.73	1			0.000222	-1.42857
Hs.81217	frizzled homolog 2 (Drosophila)	FZD2	2535	17q21.1											1.12e-05	0.6	0.98	1.58			8.16e-05	-1.81818
Hs.81256	S100 calcium binding protein A4 (calcium protein, calvasculin, metastasin, murine placental homolog)	S100A4	6275	1q21	0.000863	0.49	1.69	1.24	0.000303	3.15
Hs.82065	interleukin 6 signal transducer (gp130, oncostatin M receptor)	IL6ST	3572	5q11	0.000463	0.91	0.69	0.39			0.00027	1.91
Hs.82124	laminin, beta 1	LAMB1	3912	7q22	0.000136	1.47	0.32	0.37	2.36e-05	-4.34783
Hs.82173	TGFB inducible early growth response	TIEG	7071	8q22.2							0.000526	2.4
Hs.82283	5-methyltetrahydrofolate-homocysteine methyltransferase	MTR	4548	1q43																	0.000695	-1.63934
Hs.82399	component of oligomeric golgi complex 2	COG2	22796	1q42.13											1.78e-05	0.61	0.74	1.12			1.65e-05	-1.5873
Hs.82547	retinoic acid receptor responder (tazarotene induced) 1	RARRES1	5918	3q25.32									0.001	-1.72414
Hs.82845	Homo sapiens cDNA: FLJ21930 fis, clone HEP04301, highly similar to HSU90916 Human clone 23815 mRNA sequence.				0.000655	3.36	2.58	1.63			0.000515	1.71
Hs.82906	CDC20 cell division cycle 20 homolog (S. cerevisiae)	CDC20	991	1p34.1															0.00032	3.77
Hs.83243	KIAA1450 protein	KIAA1450	57600	4q32.1					0.000527	-1.92308
Hs.83656	Rho GDP dissociation inhibitor (GDI) beta	ARHGDIB	397	12p12.3									0.000935	-1.6129
Hs.83937	hypothetical protein FLJ20323	FLJ20323	54468	7p22-p21											0.000727	0.42	0.6	1.03			0.000536	-1.81818
Hs.84154	neuronal pentraxin I	NPTX1	4884	17q25.1-q25.2	1.64e-05	0.16	0.05	0.19					2.69e-06	3.78
Hs.84232	transcobalamin II; macrocytic anemia	TCN2	6948	22q12.2	0.000862	2.03	1.43	1.27	0.000335	-1.47059
Hs.86386	myeloid cell leukemia sequence 1 (BCL2-related)	MCL1	4170	1q21							0.000932	1.96
Hs.86412	chromosome 9 open reading frame 5	C9orf5	23731	9q31	0.000565	1.2	0.97	0.86	0.000495	-1.28205
Hs.86896	bromodomain containing 3	BRD3	8019	9q34															3.85e-06	3.1
Hs.87450	cathepsin W (lymphopain)	CTSW	1521	11q13.1																	0.000831	-1.40845
Hs.8834	ring finger protein 3	RNF3	10336	4p16.3							0.000798	-1.5873			0.000953	0.71	0.94	1.6			0.000537	-1.81818
Hs.89121	KIAA0485 protein	KIAA0485	57235		0.000272	0.38	0.63	1.17			0.000714	-2.12766
Hs.89421	CBF1 interacting corepressor	CIR	9541	2q31.1					0.000249	2.19
Hs.89472	angiotensin II receptor, type 1	AGTR1	185	3q21-q25											0.000171	0.3	1.65	1.36	1.11e-05	4.89
Hs.89474	ADP-ribosylation factor 6	ARF6	382	7q22.1	0.000615	0.41	0.82	0.44					0.000118	-1.92308
Hs.89525	hepatoma-derived growth factor (high-mobility group protein 1-like)	HDGF	3068	Xq25	0.000366	0.5	1.33	1.34	6.27e-05	2.64
Hs.89666	A kinase (PRKA) anchor protein 6	AKAP6	9472	14q12																	0.000217	2.03
Hs.90786	ATP-binding cassette, sub-family C (CFTR/MRP), member 3	ABCC3	8714	17q22	1.98e-05	2.05	0.95	0.9	3.05e-06	-2.17391
Hs.91103	hypothetical protein MGC4293	MGC4293	83475	19p13.3											8.62e-05	0.6	0.92	1.27
Hs.91142	KH-type splicing regulatory protein (FUSE binding protein 2)	KHSRP	8570	19p13.3											7.29e-05	0.14	1.02	1.16	2.64e-06	5.92
Hs.91143	jagged 1 (Alagille syndrome)	JAG1	182	20p12.1-p11.23											0.000937	0.75	0.72	1.85			0.000159	-2.5641
Hs.9235	non-metastatic cells 4, protein expressed in	NME4	4833	16p13.3											0.000188	0.43	0.66	0.79
Hs.924	crystallin, mu	CRYM	1428	16p13.11-p12.3	0.000373	1.47	0.32	0.62	0.000549	-3.7037			0.000682	2.86
Hs.93194	apolipoprotein A-I	APOA1	335	11q23-q24											0.000666	0.12	0.24	0.29
Hs.95631	unknown MGC21654 product	MGC21654	93594	8q24.13															0.000695	4.69
Hs.96055	E2F transcription factor 1	E2F1	1869	20q11.2	0.000512	0.49	0.74	0.88	0.000276	1.59
Hs.9645	tankyrase 1 binding protein 1, 182kDa	TNKS1BP1	85456	11q11																	0.000854	-2
Hs.96867	Homo sapiens cDNA: FLJ23155 fis, clone LNG09573.				0.000757	1.33	0.94	0.84	0.000294	-1.47059
Hs.96978	Homo sapiens cDNA FLJ40921 fis, clone UTERU2006103.				0.000766	0.88	0.72	0.96					0.000204	1.29
Hs.9731	nuclear factor of kappa light polypeptide gene enhancer in B-cells inhibitor, beta	NFKBIB	4793	19q13.1											9.21e-05	0.23	0.76	0.98	0.000813	3.28
Hs.9914	follistatin	FST	10468	5q11.2									0.000484	-2.43902
Hs.99348	distal-less homeo box 5	DLX5	1749	7q22	0.00012	6.22	0.95	1.19	2.24e-05	-6.25

## Sheet: Comb_Ov_and_Endo_OSE_Gene_List
					Ovarian Histologies								Endometrial Histologies
					Clear Cell vs Normal OSE		Endometrioid vs Normal OSE		Papillary Serous vs Normal OSE		All Histostypes vs Normal OSE		Clear Cell vs Normal OSE		Endometrioid vs Normal OSE		Papillary Serous vs Normal OSE		All Histostypes vs Normal OSE
Unique Gene ID	Name	Symbol	Locus Link ID	Cytoband	F-test p-value	Fold Change	F-test p-value	Fold Change	F-test p-value	Fold Change	F-test p-value	Fold Change	F-test p-value	Fold Change	F-test p-value	Fold Change	F-test p-value	Fold Change	F-test p-value	Fold Change
Hs.100030	telomeric repeat binding factor 2	TERF2	7014	16q22.1									6.49e-05	-3.33333			0.000267	-2.32558
Hs.100217	formin-like	FMNL	752	17q21									0.000638	2.71
Hs.10028	putative cyclin G1 interacting protein	CG1I	10467	7q22.1					6.03e-05	1.97	4.65e-05	1.94
Hs.100602	MAD, mothers against decapentaplegic homolog 7 (Drosophila)	MADH7	4092	18q21.1									0.000998	-3.7037
Hs.100724	peroxisome proliferative activated receptor, gamma	PPARG	5468	3p25	2.08e-06	8.83	6.61e-07	5.07	1.02e-08	4.97	3.68e-10	5.62
Hs.10082	potassium intermediate/small conductance calcium-activated channel, subfamily N, member 4	KCNN4	3783	19q13.2									0.000917	1.83
Hs.100890	candidate mediator of the p53-dependent G2 arrest	REPRIMO	56475	2q23.3			3.25e-05	-3.84615	2.87e-06	-4	2.02e-05	-3.7037
Hs.100895	hypothetical protein FLJ10462	FLJ10462	55711	12p11.22					0.000297	2.84	0.000696	2.9	0.000345	2.3
Hs.10094	solute carrier family 12 (potassium/chloride transporters), member 4	SLC12A4	6560	16q22.1									0.000799	1.69
Hs.100980	protein phosphatase 1D magnesium-dependent, delta isoform	PPM1D	8493	17q23.2					0.000346	-2.38095
Hs.101047	transcription factor 3 (E2A immunoglobulin enhancer binding factors E12/E47)	TCF3	6929	19p13.3									0.000299	-3.22581
Hs.101067	GCN5 general control of amino-acid synthesis 5-like 2 (yeast)	GCN5L2	2648	17q21									0.000765	1.9
Hs.10119	hypothetical protein FLJ14957	FLJ14957	84952	15q21.2			0.000139	-4.54545	0.000318	-4.54545	9.93e-05	-4.34783
Hs.101672	hypothetical protein FLJ31564	FLJ31564	152789	4p16.2									0.000852	2.95
Hs.102308	potassium inwardly-rectifying channel, subfamily J, member 8	KCNJ8	3764	12p11.23			8.74e-05	-2.77778	6.01e-06	-2.7027	0.000355	-2.63158					0.000836	-3.125	0.000862	-2.7027
Hs.10247	activated leukocyte cell adhesion molecule	ALCAM	214	3q13.1													0.000598	-2.7027	3.65e-05	-2.7027
Hs.102991	gem (nuclear organelle) associated protein 7	GEMIN7	79760	19q13.32					3.73e-05	3.01	5.17e-05	2.94	0.00016	2.63
Hs.10326	coatomer protein complex, subunit epsilon	COPE	11316	19p13.11			0.00029	3.01			2.16e-05	2.83
Hs.103378	hypothetical protein MGC11034	MGC11034	83641	10p13													0.000174	-2.94118
Hs.103393	ESTs																7.98e-06	1.9	2.59e-05	1.88
Hs.103419	fasciculation and elongation protein zeta 2 (zygin II)	FEZ2	9637	2p21			0.00037	-3.7037
Hs.103505	ARS component B	ARS	57152	8q24.3									0.000881	1.78
Hs.103527	SH2 domain protein 2A	SH2D2A	9047	1q21					7.33e-09	3.57
Hs.103665	villin-like	VILL	50853	3p21.3					0.000854	2.61	0.000235	2.65
Hs.104418	ESTs																0.00059	2.28
Hs.104613	RP42 homolog	RP42	54165	3q26.3			9.04e-07	9.16	5.54e-05	8.4	3.7e-06	9.26
Hs.104627	Homo sapiens cDNA FLJ10158 fis, clone HEMBA1003463.						1.59e-05	-2.85714	0.000581	-2.63158							4.03e-06	-4	2.8e-07	-3.7037
Hs.104660	eukaryotic translation initiation factor 5A2	EIF5A2	56648	3q26.2									0.000483	2.36
Hs.104679	hypothetical protein MGC18216	MGC18216	145815	15q26.3													0.00084	-1.66667
Hs.105115	absent in melanoma 2	AIM2	9447	1q22					0.000107	3.36	0.000951	2.91
Hs.105618	ESTs, Weakly similar to hypothetical protein FLJ22184 [Homo sapiens] [H.sapiens]						0.000152	-2.32558	1.02e-05	-2.5	4.53e-06	-2.38095
Hs.105850	KIAA0404 protein	KIAA0404	23130	11q12.3					4.13e-05	-1.92308	0.000591	-1.81818
Hs.10590	zinc finger protein 313	ZNF313	55905	20q13.13													0.000993	-2.17391
Hs.105941	bagpipe homeobox homolog 1 (Drosophila)	BAPX1	579	4p16.1									0.00023	2.35
Hs.106019	protein phosphatase 1, regulatory subunit 10	PPP1R10	5514	6p21.3									0.000599	-2.08333
Hs.106880	bystin-like	BYSL	705	6p21.1					4.48e-05	4.05	2.81e-05	3.64
Hs.107000	hypothetical protein FLJ11294	FLJ11294	55339	2q14.3									0.00019	1.67
Hs.10706	epithelial protein lost in neoplasm beta	EPLIN	51474	12q13			9.3e-05	-4.54545
Hs.107153	inhibitor of growth family, member 1-like	ING1L	3622	4q35.1					6.88e-06	3.6	4.35e-06	3.57
Hs.107164	spectrin, beta, non-erythrocytic 1	SPTBN1	6711	2p21			0.000259	-2.5641	0.000949	-1.96078	0.000224	-2.08333
Hs.107253	hypothetical protein DKFZp761F241	DKFZP761F241	83643	10p14					0.000724	6.24	0.000745	5.65
Hs.10745	ESTs, Weakly similar to hypothetical protein FLJ20378 [Homo sapiens] [H.sapiens]						0.000756	2.93	2.35e-05	3.38	2.51e-07	3.25
Hs.108106	ubiquitin-like, containing PHD and RING finger domains, 1	UHRF1	29128	19p13.3			0.000502	5.81	0.000101	6.29	0.000451	5.26
Hs.108301	nuclear receptor subfamily 2, group C, member 1	NR2C1	7181	12q21.32-q21.33					0.000247	2.63	0.000509	2.49	0.000818	2.93
Hs.10882	HMG-box containing protein 1	HBP1	26959	7q31.1													0.000296	-3.44828
Hs.108873	ESTs												0.000475	2.8
Hs.108885	collagen, type VI, alpha 1	COL6A1	1291	21q22.3									0.000451	-9.09091			0.000662	-8.33333
Hs.108923	RAB38, member RAS oncogene family	RAB38	23682	11q14					4.22e-07	-3.125	0.000451	-2.94118
Hs.108947	centaurin, beta 1	CENTB1	9744	17p13.2									0.000347	2.06
Hs.109225	vascular cell adhesion molecule 1	VCAM1	7412	1p32-p31			0.000426	-5.88235	0.000262	-3.57143	0.000617	-4.34783
Hs.109274	solute carrier family 27 (fatty acid transporter), member 3	SLC27A3	11000	1q21.1									0.000507	2
Hs.109439	osteoglycin (osteoinductive factor, mimecan)	OGN	4969	9q22													0.000487	-3.125	0.000136	-2.77778
Hs.109620	acidic epididymal glycoprotein-like 1	AEGL1	167	6p21.3					6.97e-05	3.27	4.02e-07	3.42
Hs.109752	putative c-Myc-responsive	RCL	10591	6p21.1															0.000459	-2.85714
Hs.11	carcinoembryonic antigen-related cell adhesion molecule 3	CEACAM3	1084	19q13.2					0.000708	3.19
Hs.110	putative L-type neutral amino acid transporter	KIAA0436	9581	2p21					0.000133	-2.94118	0.000251	-2.77778
Hs.110837	tubulin, beta, 5	TUBB5	10382	19p13.3			0.000556	-1.53846
Hs.111164	hypothetical protein MGC33993	MGC33993	221687	6p22.3									0.000985	3.12
Hs.111554	ADP-ribosylation factor-like 7	ARL7	10123	2q37.2			0.000194	2.78					0.000914	-3.44828
Hs.111680	endosulfine alpha	ENSA	2029	1q21.2	0.00067	1.57			0.000525	1.58	0.000449	1.53
Hs.1119	nuclear receptor subfamily 4, group A, member 1	NR4A1	3164	12q13									0.000268	-10			8.22e-06	-12.5	5.28e-07	-11.1111
Hs.112165	Homo sapiens cDNA FLJ12198 fis, clone MAMMA1000876.						3.55e-05	4.43
Hs.11217	KIAA0877 protein	KIAA0877	23333	7p14.1			0.000422	-2.85714	0.000356	-2.43902	0.000112	-2.5
Hs.112208	G antigen, family D, 2	GAGED2	9503	Xp11.22-p11.21									0.00041	2.22
Hs.112255	nucleoporin 98kDa	NUP98	4928	11p15.5													1.56e-05	-2.5641	5.37e-06	-2.38095
Hs.112396	proteasome activator 200 kDa	PA200	23198	2p16.1			0.00012	2.28			0.00024	2.14
Hs.112408	S100 calcium binding protein A7 (psoriasin 1)	S100A7	6278	1q21	0.000558	2.35							0.000795	2.84
Hs.112819	ESTs				2.7e-05	8.6	4.09e-06	7.66	9.4e-12	6.65	8.82e-13	7.26
Hs.112933	par-6 partitioning defective 6 homolog alpha (C.elegans)	PARD6A	50855	16q21			4.12e-08	5.02	0.000201	4.08	8.43e-05	4.1
Hs.112993	Homo sapiens, similar to RIKEN cDNA 1110059E24, clone IMAGE:5218126, mRNA								0.000269	-2.12766
Hs.113207	G protein-coupled receptor 30	GPR30	2852	7p22					0.000992	2.34	0.000115	2.35
Hs.113221	deoxyribonuclease I	DNASE1	1773	16p13.3									0.000413	3.56
Hs.1137	uromodulin (uromucoid, Tamm-Horsfall glycoprotein)	UMOD	7369	16p13.11									0.000514	1.72
Hs.11383	chemokine (C-C motif) ligand 13	CCL13	6357	17q11.2					6.29e-05	3.89	0.00075	3.23	7.27e-05	3.87
Hs.11393	RAD51 homolog C (S. cerevisiae)	RAD51C	5889	17q22-q23									0.000674	2.51
Hs.114218	frizzled homolog 6 (Drosophila)	FZD6	8323	8q22.3-q23.1															0.000875	-1.96078
Hs.114316	sialyltransferase 8C (alpha2,3Galbeta1,4GlcNAcalpha 2,8-sialyltransferase)	SIAT8C	51046	18q21.2													0.00091	1.71
Hs.114360	transforming growth factor beta-stimulated protein TSC-22	TSC22	8848	13q14															0.000703	-6.25
Hs.114676	tumor necrosis factor receptor superfamily, member 11a, activator of NFKB	TNFRSF11A	8792	18q22.1							8.07e-05	2.62	0.000543	2.25
Hs.1149	LIM domain only 1 (rhombotin 1)	LMO1	4004	11p15									0.000547	2.41
Hs.11493	Homo sapiens cDNA FLJ13536 fis, clone PLACE1006521.						0.000109	-2.27273
Hs.115166	sciellin	SCEL	8796	13q22									7.18e-05	4.17
Hs.1154	oviductal glycoprotein 1, 120kDa (mucin 9, oviductin)	OVGP1	5016	1p13	0.000697	-7.14286			0.000377	-7.14286	0.000149	-6.66667
Hs.115521	REV3-like, catalytic subunit of DNA polymerase zeta (yeast)	REV3L	5980	6q21													6.07e-05	-4.16667	0.000226	-4.34783
Hs.115740	TBC1 domain family, member 5	TBC1D5	9779	3p24.3					0.000774	-1.75439	0.000327	-1.78571
Hs.115770	tumor necrosis factor (ligand) superfamily, member 11	TNFSF11	8600	13q14									1.26e-05	2.73
Hs.115830	heparan sulfate (glucosamine) 3-O-sulfotransferase 2	HS3ST2	9956	16p12					0.000194	4.22	4.99e-06	4.19
Hs.116051	myeloma overexpressed gene (in a subset of t(11;14) positive multiple myelomas)	MYEOV	26579	11q13									8.84e-06	2.75
Hs.116237	vav 1 oncogene	VAV1	7409	19p13.2					3.55e-05	3.56	3.5e-05	3.49
Hs.116602	hypothetical protein BC009115	LOC92935	92935	2q33.1									9.1e-05	2.14
Hs.116651	epithelial V-like antigen 1	EVA1	10205	11q24													1.33e-05	-9.09091	4.93e-05	-6.66667
Hs.11689	Notch homolog 4 (Drosophila)	NOTCH4	4855	6p21.3									0.000395	1.63
Hs.117242	meningioma expressed antigen 6 (coiled-coil proline-rich)	MGEA6	4253	14q													0.000903	-3.84615	0.000496	-3.125
Hs.117333	KIAA1093 protein	KIAA1093	23112	22q13.1					7.76e-05	3.22	0.000585	2.95
Hs.11776	U4/U6-associated RNA splicing factor	HPRP3P	9129	1q21.1													0.000389	-1.5625
Hs.117964	hypothetical protein FLJ13305	FLJ13305	84140	2p14									0.000626	3.32
Hs.117992	sialic acid binding Ig-like lectin 6	SIGLEC6	946	19q13.3									0.00033	4.26			0.00083	2.65
Hs.118126	protective protein for beta-galactosidase (galactosialidosis)	PPGB	5476	20q13.1					5.01e-05	2.05
Hs.118140	KIAA0716 gene product	KIAA0716	9732	7q21.13	0.000345	-2.7027	5.6e-06	-3.0303			0.000548	-2.38095
Hs.1183	dual specificity phosphatase 2	DUSP2	1844	2q11									4.47e-05	-5.55556			9.79e-05	-3.84615	3.78e-05	-3.84615
Hs.118634	ATP-binding cassette, sub-family B (MDR/TAP), member 8	ABCB8	11194	7q36									0.000702	2.22
Hs.118638	non-metastatic cells 1, protein (NM23A) expressed in	NME1	4830	17q21.3					0.000522	3	0.000519	2.82
Hs.118666	FAD-synthetase	PP591	80308	1q21.3					6.4e-05	2.22	0.00023	2.22
Hs.1189	E2F transcription factor 3	E2F3	1871	6p22			3.42e-06	3.94	0.000305	3.68	0.00091	3.24
Hs.118923	Homo sapiens, clone IMAGE:5277929, mRNA						0.000731	5.07
Hs.11899	3-hydroxy-3-methylglutaryl-Coenzyme A reductase	HMGCR	3156	5q13.3-q14													7.95e-06	-6.25	3.45e-05	-5.55556
Hs.119023	SMC2 structural maintenance of chromosomes 2-like 1 (yeast)	SMC2L1	10592	9q31.1													7e-06	5	0.000873	4.55
Hs.119065	ESTs						6.91e-06	4.26
Hs.1191	KIAA0073 protein	KIAA0073	23398	5q12.2					0.000256	-1.92308
Hs.119206	insulin-like growth factor binding protein 7	IGFBP7	3490	4q12													0.00046	-4.34783
Hs.119475	cold inducible RNA binding protein	CIRBP	1153	19p13.3			0.00068	-3.84615					0.00026	-5	0.000658	-3.22581	2.62e-05	-5	3.41e-06	-4.34783
Hs.119983	mannan-binding lectin serine protease 2	MASP2	10747	1p36.3-p36.2			2.01e-05	7.97	2.76e-09	8.18	7.28e-08	7.81
Hs.120021	DKFZP434I092 protein	DKFZP434I092	26166	8q22.2									0.000108	-6.25
Hs.120446	hypothetical protein FLJ35801	FLJ35801	150291	22q12.2									0.000416	1.66
Hs.120638	Homo sapiens cDNA FLJ34425 fis, clone HHDPC2008297.								0.000664	2.46
Hs.120695	ESTs				0.000268	1.5
Hs.121017	histone 1, H2ae	HIST1H2AE	3012	6p22.2-p21.1													0.000339	-1.47059
Hs.1211	acid phosphatase 5, tartrate resistant	ACP5	54	19p13.3-p13.2			0.000927	4.3
Hs.121482	5-hydroxytryptamine (serotonin) receptor 1D	HTR1D	3352	1p36.3-p34.3													0.000817	2.19
Hs.121483	chloride channel 1, skeletal muscle (Thomsen disease, autosomal dominant)	CLCN1	1180	7q35									7.63e-05	2.28
Hs.121502	mannosyl (alpha-1,6-)-glycoprotein beta-1,6-N-acetyl-glucosaminyltransferase	MGAT5	4249	2q21													8.81e-05	1.88	0.000291	1.79
Hs.121503	thyroid hormone receptor, beta (erythroblastic leukemia viral (v-erb-a) oncogene homolog 2, avian)	THRB	7068	3p24.3					0.000735	-1.36986
Hs.121553	hypothetical protein FLJ20641	FLJ20641	55010	12q23.1			8.41e-05	5.76	5.39e-06	5.42	0.000101	5.02
Hs.121557	Homo sapiens, clone IMAGE:3626729, mRNA						6.64e-07	6.76	5.79e-07	7.76	2.88e-07	7.24
Hs.1219	alcohol dehydrogenase 4 (class II), pi polypeptide	ADH4	127	4q21-q24			1.72e-05	5.01
Hs.122559	hypothetical protein FLJ22570	FLJ22570	79930	5q35.3			2.16e-05	4.23
Hs.122607	B-cell CLL/lymphoma 9	BCL9	607	1q21			8.14e-07	5.66	1.4e-06	5.62	4.13e-07	5.21
Hs.122764	BRCA1 associated protein	BRAP	8315	12q24															0.000629	-6.25
Hs.123022	adrenergic, alpha-2C-, receptor	ADRA2C	152	4p16					0.000861	2.6
Hs.123122	FSH primary response (LRPR1 homolog, rat) 1	FSHPRH1	2491	Xq22					0.000185	3.05	5.51e-05	2.98
Hs.123209	ESTs						3.16e-06	3.48
Hs.12337	kinase insert domain receptor (a type III receptor tyrosine kinase)	KDR	3791	4q11-q12			8.04e-05	-4.34783	6.93e-06	-3.84615	6.98e-05	-3.7037
Hs.12372	tripartite motif-containing 2	TRIM2	23321	4q31.23													4.78e-05	-2.22222	7.53e-05	-2.12766
Hs.12413	KIAA0191 protein	KIAA0191	23318	1p32.3									0.000295	-2.17391
Hs.124704	hypothetical protein BC014022	LOC116143	116143	2p13.2									0.000763	2.64			0.000998	2.42
Hs.124840	hypothetical protein BC012330	LOC116071	116071	11q12.3					0.000185	2.81			1.09e-05	2.72
Hs.124854	chromosome 7 open reading frame 13	C7orf13	129790						0.000627	3.9	0.000445	3.27
Hs.125180	growth hormone receptor	GHR	2690	5p13-p12									0.000689	2
Hs.12520	hypothetical protein LOC257407	LOC257407	257407	2q37.1					1.53e-06	-2.12766	2.62e-05	-2.04082
Hs.125490	basic leucine zipper nuclear factor 1 (JEM-1)	BLZF1	8548	1q24					3.21e-05	1.9	0.000207	1.81
Hs.125494	KIAA0507 protein	KIAA0507	57241										0.00014	2.99
Hs.125849	musashi homolog 1 (Drosophila)	MSI1	4440	12q24.1-q24.31									0.000775	1.48
Hs.1265	hypocretin (orexin) neuropeptide precursor	HCRT	3060	17q21			6.98e-07	7.76	0.000346	6.64	1.67e-05	7.05
Hs.126779	cartilage oligomeric matrix protein (pseudoachondroplasia, epiphyseal dysplasia 1, multiple)	COMP	1311	19p13.1	0.000448	10.88			4.99e-06	7.42	4.08e-06	7.75
Hs.12680	CDC16 cell division cycle 16 homolog (S. cerevisiae)	CDC16	8881	13q34	0.000863	-3.44828
Hs.1270	forkhead box E1 (thyroid transcription factor 2)	FOXE1	2304	9q22									0.000827	2.16
Hs.127111	Human clone 23948 mRNA sequence						0.000759	-2.85714
Hs.127337	uroplakin 1A	UPK1A	11045	19q13.13									0.000159	1.98
Hs.1274	peptidylglycine alpha-amidating monooxygenase COOH-terminal interactor	PAMCI	9182	12													0.000431	1.95	0.000108	1.97
Hs.127614	molybdenum cofactor synthesis 3	MOCS3	27304	20q13.13									0.000269	2.33
Hs.12820	GRB2-related adaptor protein	GRAP	10750	17p11.2					0.00033	2.77	4.49e-06	2.98
Hs.128439	platelet activating receptor homolog	H963	29909	3q25.1									6.42e-05	-7.14286
Hs.128753	lymphocyte antigen 6 complex, locus H	LY6H	4062	8q24.3					0.000123	2.28			0.000652	1.93
Hs.128759	nuclear receptor coactivator 6	NCOA6	23054	20q11			0.000671	1.8
Hs.12876	ESTs								0.000281	-2.38095
Hs.128841	ESTs						4.44e-07	3.51	1.59e-08	3.14	3.38e-05	3.12
Hs.129055	hypothetical protein FLJ21877	FLJ21877	63892	2p21									0.000805	-1.44928
Hs.12926	chromodomain protein, Y chromosome-like	CDYL	9425	6p25.1					0.000211	3.25	1.8e-06	3.32
Hs.1294	absent in melanoma 1	AIM1	202	6q21			0.000774	-2.85714	0.000144	-2.17391	0.000122	-2.32558
Hs.129739	cholinergic receptor, nicotinic, alpha polypeptide 5	CHRNA5	1138	15q24													0.00017	2.15
Hs.129758	tyrosine aminotransferase	TAT	6898	16q22.1									3.39e-05	3.76
Hs.129837	connector enhancer of KSR-like (Drosophila kinase suppressor of ras)	CNK1	10256	1p35.3			0.0001	4.07
Hs.129883	B-cell CLL/lymphoma 7B	BCL7B	9275	7q11.23									4.64e-05	-2.38095
Hs.129953	sidekick homolog 2 (chicken)	SDK2	54549	17q25.1									0.000255	-1.5873
Hs.130038	ESTs						0.000225	-2
Hs.130181	chromosome 8 open reading frame 2	C8orf2	11160	8p11.2									0.000222	2.8
Hs.13034	branched chain keto acid dehydrogenase E1, beta polypeptide (maple syrup urine disease)	BCKDHB	594	6q13-15													0.000476	1.75
Hs.130499	NY-REN-7 antigen	NY-REN-7	285596	5q35.3					8.03e-07	-3.84615	5.19e-06	-3.44828
Hs.130838	Homo sapiens cDNA FLJ10196 fis, clone HEMBA1004776.						0.000325	5.68			0.000274	5.29
Hs.1310	glucokinase (hexokinase 4, maturity onset diabetes of the young 2)	GCK	2645	7p15.3-p15.1									0.0008	2.04
Hs.1311	tektin 2 (testicular)	TEKT2	27285	1p35.3-p34.1									0.000772	2.45
Hs.131188	axin 2 (conductin, axil)	AXIN2	8313	17q23-q24					0.000262	-1.88679
Hs.1313	bone morphogenetic protein 1	BMP1	649	8p21													0.000111	-2.04082	0.000529	-1.88679
Hs.13138	protein phosphatase 1, regulatory (inhibitor) subunit 3A (glycogen and sarcoplasmic reticulum binding subunit, skeletal muscle)	PPP1R3A	5506	7q31.1													1.09e-05	3.01
Hs.1314	SnRNP assembly defective 1 homolog	SAD1	10713	2p11.2					4.35e-05	1.54
Hs.131728	ESTs				8.15e-05	9.1	1.53e-05	8.72	0.000248	7.93	1.84e-06	8.38
Hs.1323	Homo sapiens cDNA FLJ20769 fis, clone COL06674.												8.33e-05	2.36
Hs.13256	sterile alpha and HEAT/Armadillo motif protein, ortholog of Drosophila	SARM	23098														0.000974	-2.12766
Hs.1327	ESTs												9.04e-05	-7.69231
Hs.132792	ESTs								0.000988	2.18			0.000986	1.78
Hs.132816	outer dense fiber of sperm tails 2	ODF2	4957	9q34.11			8.82e-08	3.14	1.7e-07	3.36	1.84e-07	3.24
Hs.132834	Homo sapiens, clone IMAGE:4792351, mRNA												0.000885	2.01
Hs.132906	calcium channel, voltage-dependent, L type, alpha 1S subunit	CACNA1S	779	1q32									0.000478	2.93
Hs.133065	KIAA0514 gene product	KIAA0514	9721	10q11.21									0.000743	2.1
Hs.133152	proline-serine-threonine phosphatase interacting protein 1	PSTPIP1	9051	15q24-q25.1			0.000807	3.01
Hs.133342	hypothetical protein MGC17919	MGC17919	127557	1p34.3					3.7e-05	-1.78571
Hs.13349	KIAA0420 gene product	KIAA0420	9717	16p13.3			6.14e-05	3.77
Hs.13351	Ewing sarcoma breakpoint region 1	EWSR1	2130	22q12.2													0.000306	-3.57143	0.000104	-3.33333
Hs.13421	ESTs												0.000737	3.8
Hs.13431	UDP-N-acetyl-alpha-D-galactosamine:polypeptide N-acetylgalactosaminyltransferase 2 (GalNAc-T2)	GALNT2	2590	1q41-q42					0.000281	-1.96078	0.000364	-1.85185
Hs.13451	hypothetical protein MGC24180	MGC24180	125228	18p11.1			1.44e-05	4.21			0.000412	3.9
Hs.135150	ESTs												4.59e-05	3.54
Hs.135188	ESTs						8.68e-06	4.49	4.19e-07	4.06	2.24e-06	4.05	0.000529	-4.7619
Hs.13530	CD1B antigen, b polypeptide	CD1B	910	1q22-q23	0.000126	5.07	3.58e-07	3.95	1.31e-07	4.46	1.14e-09	4.44
Hs.1355	CD1C antigen, c polypeptide	CD1C	911	1q22-q23			0.00093	3.9
Hs.136280	ESTs				0.000868	5.22	0.000937	5.28	6.28e-05	5.34	4.09e-07	5.3
Hs.136309	tumor necrosis factor (ligand) superfamily, member 8	TNFSF8	944	9q33			3.3e-05	4.44
Hs.136574	hypothetical protein MGC27076	MGC27076	205564	3q29									0.000478	1.99			5.57e-05	2.13	9.35e-05	2.08
Hs.137569	tumor necrosis factor receptor superfamily, member 8	TNFRSF8	943	1p36					5.94e-05	-2.63158
Hs.137572	tetratricopeptide repeat domain 7	TTC7	57217	2p21									7.48e-05	2.85
Hs.1378	cyclic nucleotide gated channel alpha 1	CNGA1	1259	4p12-cen			8.74e-05	4.51
Hs.13804	Homo sapiens cDNA FLJ37858 fis, clone BRSSN2015238.												0.000348	4.42
Hs.138380	butyrylcholinesterase	BCHE	590	3q26.1-q26.2			0.000204	-100	1.56e-05	-100	5.6e-06	-100
Hs.139033	serologically defined colon cancer antigen 43	SDCCAG43	10812	9q22.2			0.000175	-2.85714	0.000878	-3.22581	0.000876	-2.85714
Hs.139120	hypothetical protein MGC14801	MGC14801	84791	1q32.2			5.2e-05	4.43
Hs.13944	hematopoietic protein 1	HEM1	3071	12q13.1					3.48e-05	2.33	3.75e-05	2.31
Hs.139851	19A24 protein	CRACC	57823	1q23.1-q24.1					0.000382	2.31
Hs.14125	Human clone CE29 7.2 (CAC)n/(GTG)n repeat-containing mRNA.								0.000573	-2.12766	0.00064	-1.96078
Hs.142023	ESTs												0.000429	2.43
Hs.142150	Homo sapiens clone 24566 mRNA sequence																0.000154	1.9
Hs.142255	neurofascin	NFASC	23114	1q32.1									0.000355	-3.7037
Hs.142846	LanC lantibiotic synthetase component C-like 1 (bacterial)	LANCL1	10314	2q33-q35					0.000236	-2.22222							0.000827	-2.5641	0.000288	-2.5641
Hs.1430	KIAA0056 protein	KIAA0056	23310	11q25			4.88e-05	5.71	1.29e-05	5.3	2.97e-05	4.95
Hs.143032	Homo sapiens clone 24790 mRNA sequence						0.000677	-3.33333	0.000572	-2.85714	0.00061	-2.77778
Hs.143113	dystrobrevin, beta	DTNB	1838	2p23-p22					8.68e-06	-1.81818	1.44e-05	-1.72414
Hs.143212	lung type-I cell membrane-associated glycoprotein	T1A-2	10630	1p36			0.000445	-2.12766
Hs.1435	Homo sapiens, G1 to S phase transition 2, clone MGC:33729 IMAGE:5313878, mRNA, complete cds												0.000688	1.96
Hs.143601	deafness, autosomal dominant 5	DFNA5	1687	7p15	0.000498	-7.69231	2.66e-08	-10	8.71e-12	-7.14286	2.86e-11	-7.69231					0.000154	-1.85185	0.000523	-1.78571
Hs.143698	cathepsin E	CTSE	1510	1q31					1.14e-05	4.99	1.44e-05	4.46	0.000788	2.33
Hs.143897	Homo sapiens cDNA: FLJ22288 fis, clone HRC04157.												0.000975	2.89
Hs.144028	SH3-domain GRB2-like endophilin B1	SH3GLB1	51100	1p22									6.37e-05	2.04
Hs.145381	arachidonate 12-lipoxygenase, 12R type	ALOX12B	242	17p13.1			0.000636	3.31	2.17e-05	2.83	4.4e-07	3.02
Hs.1454	tumor protein p73-like	TP73L	8626	3q27-q29			0.000114	3.42	3.39e-06	3.23	1.04e-05	3.46					0.00015	1.83
Hs.146355	rhomboid, veinlet-like 1 (Drosophila)	RHBDL	9028	16p13.3									6.08e-05	3.32
Hs.146388	annexin A3	ANXA3	306	4q13-q22			9.22e-05	-7.69231	3.11e-05	-5.88235	5.88e-05	-7.69231
Hs.146393	hypothetical protein dJ462O23.2	DJ462O23.2	57185	1p36.12-p35.1					0.000826	-1.96078	0.000189	-1.92308
Hs.14732	SLAC2-B	SLAC2-B	23086	11q23.1					0.000296	3.61
Hs.14805	paternally expressed 3	PEG3	5178	19q13.4					0.000704	-10
Hs.148495	ribonuclease P (30kD)	RPP30	10556	10q23.31					0.000409	2.51
Hs.14968	adrenergic, beta, receptor kinase 2	ADRBK2	157	22q12.1			0.00054	2.87
Hs.149894	caveolin 2	CAV2	858	7q31.1			2.26e-05	-3.22581
Hs.149923	p53 regulated PA26 nuclear protein	PA26	27244	6q21			0.000345	-2.63158
Hs.15032	T cell activation, increased late expression	TACTILE	10225	3q13.13									0.000543	2.74
Hs.150423	Kruppel-type zinc finger (C2H2)	ZK1	10224	19p13.13	0.000767	-2							0.00091	-2.94118
Hs.150477	islet amyloid polypeptide	IAPP	3375	12p12.3-p12.1					0.000257	2.68	0.000991	2.47
Hs.150557	hypothetical protein IR1899308	IR1899308	55897	15q25.3									0.000113	3.01
Hs.150956	coagulation factor XI (plasma thromboplastin antecedent)	F11	2160	4q35													0.000415	2.28
Hs.15113	ESTs, Weakly similar to neuronal thread protein [Homo sapiens] [H.sapiens]												0.000213	2.27
Hs.15114	pancreatic lipase-related protein 2	PNLIPRP2	5408	10q26.11									0.000128	2.71
Hs.151236	cystatin F (leukocystatin)	CST7	8530	20p11.21					0.000165	2.5	0.000452	2.33
Hs.15167	guanosine monophosphate reductase	GMPR	2766	6p23															6.03e-05	-3.57143
Hs.151777	cyclin L2	CCNL2	81669	1p36.33													0.000306	-3.84615
Hs.151903	ESTs								0.000527	2.69	0.000985	2.54
Hs.15196	dysferlin, limb girdle muscular dystrophy 2B (autosomal recessive)	DYSF	8291	2p13.3-p13.1					0.000888	2.97	6.04e-05	3.12
Hs.152175	KIAA1084 protein	KIAA1084	22847	19q12									3.45e-05	1.73
Hs.15265	general transcription factor IIE, polypeptide 1, alpha 56kDa	GTF2E1	2960	3q21-q24									0.000636	3.27
Hs.153293	gastric inhibitory polypeptide	GIP	2695	17q21.3-q22									0.00025	1.52
Hs.153614	v-abl Abelson murine leukemia viral oncogene homolog 1	ABL1	25	9q34.1					0.000454	-1.75439
Hs.153640	microtubule-associated protein 7	MAP7	9053	6q23.2			3.67e-05	-3.84615	3e-06	-3.0303	2.79e-05	-3.125
Hs.153678	homocysteine-inducible, endoplasmic reticulum stress-inducible, ubiquitin-like domain member 1	HERPUD1	9709	16q12.2-q13													0.000903	-4.16667	0.000252	-3.84615
Hs.153687	malic enzyme 1, NADP(+)-dependent, cytosolic	ME1	4199	6q12					0.000572	-2.32558
Hs.153692	solute carrier family 21 (organic anion transporter), member 11	SLC21A11	28232	15q26	3.17e-05	-1.92308	0.000774	-2.17391	9.51e-05	-1.78571	1.45e-05	-1.92308
Hs.153952	proteasome (prosome, macropain) 26S subunit, non-ATPase, 4	PSMD4	5710	1q21.2			0.000259	2.55	0.000511	2.15	0.000246	2.19
Hs.153985	pleiomorphic adenoma gene 1	PLAG1	5324	8q12					0.000717	2.12	0.000279	2.31
Hs.154045	mitochondrial translational initiation factor 2	MTIF2	4528	2p14-p16			0.000262	2.37
Hs.154103	X-box binding protein 1	XBP1	7494	22q12.1													0.000717	-2.08333
Hs.154151	RAN binding protein 17	RANBP17	64901	5q34	0.000663	4.54
Hs.154230	cyclin-dependent kinase 9 (CDC2-related kinase)	CDK9	1025	9q34.1			4.93e-07	-1.63934
Hs.154320	Werner syndrome	WRN	7486	8p12-p11.2									0.00024	2.33
Hs.15441	basic transcription element binding protein 1	BTEB1	687	9q13													0.000335	-20	0.000167	-16.6667
Hs.154443	exostoses (multiple)-like 1	EXTL1	2134	1p36.1									3.67e-05	1.96
Hs.1545	homogentisate 1,2-dioxygenase (homogentisate oxidase)	HGD	3081	3q21-q23	0.000307	16.97	2.35e-05	5.95	5.08e-07	5.39	2.11e-05	6.99							0.000308	-2.7027
Hs.154510	ras homolog gene family, member D	ARHD	29984	11q14.3					0.000693	2.45	0.000623	2.36	0.000717	2.25
Hs.155119	highly charged protein	D13S106E	10208	13q12-q14													3.04e-05	-2.38095	1.6e-05	-2.32558
Hs.155206	hypothetical protein FLJ30663	FLJ30663	148103	19q13.11									0.000456	3.25
Hs.155376	eukaryotic translation initiation factor 2, subunit 1 alpha, 35kDa	EIF2S1	1965	14q23.3					0.001	2.76							0.000521	-2.38095
Hs.155499	GrpE-like protein cochaperone	HMGE	80273	4p16			0.000186	2.05	0.000825	2.11	0.000134	2.08
Hs.155545	chromosome 17 open reading frame 35	C17orf35	8834	17p11.1					0.000113	2.73
Hs.156016	calcitonin receptor-like	CALCRL	10203	2q32.2									1.72e-05	-3.0303
Hs.15711	heterogeneous nuclear ribonucleoprotein R	HNRPR	10236	1p36.11									0.000218	-2.5641					0.000726	-2
Hs.1572	KIAA0701 protein	KIAA0701	23074	12q23.2									0.000478	3.12
Hs.157211	retinitis pigmentosa GTPase regulator	RPGR	6103	Xp11.4									0.000843	1.91
Hs.157433	cytokine-inducible kinase	CNK	1263	1p34.1			0.000118	3.13	0.000122	4.63	2.72e-05	4.01
Hs.1578	reproduction 8	D8S2298E	7993	8p12-p11.2									0.000277	4.6
Hs.158205	inositol polyphosphate-4-phosphatase, type II, 105kDa	INPP4B	8821	4q31.1	8.76e-08	10.07	1.07e-06	7.71	9.16e-12	10.53	1.1e-14	9.63
Hs.158241	monogenic, audiogenic seizure susceptibility 1 homolog (mouse)	MASS1	84059	5q13									0.000296	2.73
Hs.158311	5'-nucleotidase, ecto (CD73)	NT5E	4907	6q14-q21			3.23e-05	-6.25
Hs.158348	solute carrier family 7 (cationic amino acid transporter, y+ system), member 2	SLC7A2	6542	8p22-p21.3					9.17e-05	2.54	8.13e-06	2.48
Hs.1584	KIAA0082 protein	KIAA0082	23070	6p21.2									0.000374	-2.04082
Hs.1592	LIM protein (similar to rat protein kinase C-binding enigma)	LIM	10611	4q22													0.000981	1.66
Hs.159234	protein tyrosine phosphatase, receptor type, M	PTPRM	5797	18p11.2													5.93e-05	-3.125	6.11e-05	-2.77778
Hs.159264	nuclear domain 10 protein	NDP52	10241	17q21.32			0.000333	-1.75439			0.000714	-1.5873
Hs.159309	ubiquitin-activating enzyme E1C (UBA3 homolog, yeast)	UBE1C	9039	3p24.3-p13													8.09e-05	-1.96078
Hs.159396	Crm, cramped-like (Drosophila)	CRAMP1L	57585	16p13.3					0.00074	-1.81818							0.000735	-2.08333
Hs.159410	MCM4 minichromosome maintenance deficient 4 (S. cerevisiae)	MCM4	4173	8q12-q13					0.000898	2.88	7.36e-05	2.76					0.000109	1.79	0.000109	1.73
Hs.159517	caudal type homeo box transcription factor 1	CDX1	1044	5q31-q33									0.000209	2.56
Hs.159545	carbonyl reductase 3	CBR3	874	21q22.2			4.63e-06	3.53
Hs.159590	EH-domain containing 1	EHD1	10938	11q13			0.000284	-1.78571
Hs.159613	serine/threonine kinase 25 (STE20 homolog, yeast)	STK25	10494	2q37.3			0.000412	2.13
Hs.159970	hemoglobin, beta	HBB	3043	11p15.5			1.43e-07	-14.2857	5.02e-07	-9.09091	4.93e-07	-10					0.000125	-7.14286	2.68e-05	-5.88235
Hs.160489	golgi-specific brefeldin A resistance factor 1	GBF1	8729	10q24													0.000648	-1.75439
Hs.16063	37 kDa leucine-rich repeat (LRR) protein	P37NB	10234	7q22.1			0.000835	3.47
Hs.16081	KIAA0140 gene product	KIAA0140	9679	10q26.2					0.000508	1.51	0.000163	1.46
Hs.161002	kinesin family member 13B	KIF13B	23303	8p12													0.000132	-2.08333	0.000672	-1.88679
Hs.1614	faciogenital dysplasia (Aarskog-Scott syndrome)	FGD1	2245	Xp11.21									0.000105	-6.66667
Hs.161640	C1q and tumor necrosis factor related protein 5	C1QTNF5	114902	11q23.3					0.000825	2.93
Hs.16232	gap junction protein, alpha 8, 50kDa (connexin 50)	GJA8	2703	1q21.1			0.000918	2.71
Hs.16269	baculoviral IAP repeat-containing 5 (survivin)	BIRC5	332	17q25			3.68e-06	1.96	0.000495	2.13	0.000537	1.96
Hs.164221	ESTs																1.96e-06	2.7
Hs.164649	hypothetical protein DKFZp434H247	DKFZp434H247	55588	19q13.13									0.000587	1.67
Hs.16512	hypothetical protein FLJ21079	FLJ21079	79627	6q13					6.82e-07	4.18	4.94e-05	3.78
Hs.16530	chemokine (C-C motif) ligand 18 (pulmonary and activation-regulated)	CCL18	6362	17q11.2															0.000902	1.63
Hs.165607	hypothetical protein FLJ25416	FLJ25416	220042	11q13.5					6.23e-06	3.01	0.000416	2.72	0.000799	2.07
Hs.165655	solute carrier family 38, member 4	SLC38A4	55089										0.000123	2.42
Hs.165662	KIAA0675 gene product	KIAA0675	9666	3q13.12													0.000184	-1.85185
Hs.1657	estrogen receptor 1	ESR1	2099	6q25.1													0.000491	-9.09091	0.000474	-8.33333
Hs.166011	catenin (cadherin-associated protein), delta 1	CTNND1	1500	11q11													0.000445	-4.54545	0.000553	-3.84615
Hs.166017	microphthalmia-associated transcription factor	MITF	4286	3p14.1-p12.3													6.29e-05	-3.33333
Hs.166019	regulatory factor X, 3 (influences HLA class II expression)	RFX3	5991	9p24.2					0.000307	2.88	2.38e-05	2.89
Hs.166066	cisplatin resistance associated	CRA	10903	1q12-q21			9.96e-05	-1.66667
Hs.166184	intersectin 2	ITSN2	50618	2pter-p25.1							0.000548	-1.88679					0.000269	-2.5641
Hs.166891	regulatory factor X, 5 (influences HLA class II expression)	RFX5	5993	1q21									0.000967	-7.14286
Hs.167013	dynamin 2	DNM2	1785	19p13.13									0.000598	2.16
Hs.167017	gamma-aminobutyric acid (GABA) B receptor, 1	GABBR1	2550	6p21.31	0.000291	-3.125	0.000247	-2.63158	3.79e-05	-3.57143	7.47e-06	-3.22581					0.000912	-2.12766
Hs.167741	butyrophilin, subfamily 3, member A3	BTN3A3	10384	6p22.1									0.000605	-1.85185
Hs.169002	pre-T-cell receptor alpha precursor	PTCRA	171558	6p21.3															0.000917	3.38
Hs.169172	calpain 6	CAPN6	827	Xq23									4.62e-05	4.55
Hs.169238	fucosyltransferase 3 (galactoside 3(4)-L-fucosyltransferase, Lewis blood group included)	FUT3	2525	19p13.3			0.000975	3.49	0.000305	3.46	0.000107	3.34
Hs.169241	ELK4, ETS-domain protein (SRF accessory protein 1)	ELK4	2005	1q32			0.000251	3.91	0.000409	3.41	4.93e-05	3.63					9.85e-05	2.19
Hs.169266	neuropeptide Y receptor Y1	NPY1R	4886	4q31.3-q32			0.000736	-2.27273	0.000133	-2.17391	0.000755	-2.22222
Hs.169300	transforming growth factor, beta 2	TGFB2	7042	1q41									9.02e-05	-5.55556
Hs.169378	multiple PDZ domain protein	MPDZ	8777	9p24-p22									3.87e-05	-9.09091
Hs.169449	protein kinase C, alpha	PRKCA	5578	17q22-q23.2			6.71e-05	-2.32558	4.29e-06	-2.38095	2.11e-07	-2.32558					0.00057	1.59
Hs.169452	zinc finger protein 398	ZNF398	57541	7q36.1									0.000669	-7.14286
Hs.169470	dystrophin (muscular dystrophy, Duchenne and Becker types)	DMD	1756	Xp21.2					0.000319	-1.96078
Hs.169487	v-maf musculoaponeurotic fibrosarcoma oncogene homolog B (avian)	MAFB	9935	20q11.2-q13.1											0.000291	2.12
Hs.16950	KIAA0342 gene product	KIAA0342	9881	3p21.33			3.66e-05	-3.44828	1.7e-06	-3.125	4.65e-09	-3.22581
Hs.169517	aldehyde dehydrogenase 1 family, member B1	ALDH1B1	219	9p11.1									0.000967	2.51
Hs.169600	KIAA0826 protein	KIAA0826	23045	4p11													0.000699	-3.57143	0.000874	-3.125
Hs.1697	ATPase, H+ transporting, lysosomal 56/58kDa, V1 subunit B, isoform 2	ATP6V1B2	526	8p22-p21													0.000688	-2.27273
Hs.169886	tenascin XB	TNXB	7148	6p21.3	0.000176	-2.77778	0.000271	-2.94118	5.96e-05	-3.125	3.22e-06	-2.94118
Hs.170019	runt-related transcription factor 3	RUNX3	864	1p36									0.000432	-3.57143			0.000182	-2.7027	0.000164	-2.5641
Hs.170204	KIAA0551 protein	KIAA0551	23043	3q26.31					2.05e-06	5.47	5.73e-07	5.14
Hs.170238	sodium channel, voltage-gated, type I, beta polypeptide	SCN1B	6324	19q13.1			0.00018	-2.17391
Hs.170250	complement component 4A	C4A	720	6p21.3			0.000437	-12.5			0.000262	-7.69231
Hs.170263	tumor protein p53 binding protein, 1	TP53BP1	7158	15q15-q21													0.000118	-2.17391	0.000305	-2.08333
Hs.170819	serine/threonine kinase 29	STK29	9024	11p15.5			8.15e-05	4.45
Hs.171014	VGF nerve growth factor inducible	VGF	7425	7q22	0.000213	4.12
Hs.171391	C-terminal binding protein 2	CTBP2	1488	10q26.2			0.000299	3
Hs.171476	EST																		0.000467	-3.57143
Hs.171553	Homo sapiens clone 24630 mRNA sequence												0.000966	-2.77778
Hs.171626	S-phase kinase-associated protein 1A (p19A)	SKP1A	6500	5q31															0.000316	-4.34783
Hs.171734	protein phosphatase 2, regulatory subunit B (B56), gamma isoform	PPP2R5C	5527	14q32									0.000339	-2.32558
Hs.171921	sema domain, immunoglobulin domain (Ig), short basic domain, secreted, (semaphorin) 3C	SEMA3C	10512	7q21-q31			4.76e-06	-4.54545
Hs.171955	trophinin associated protein (tastin)	TROAP	10024	12q13.12									0.00025	-5.55556
Hs.171992	protein tyrosine phosphatase, receptor type, J	PTPRJ	5795	11p11.2									0.000641	3.11
Hs.172028	a disintegrin and metalloproteinase domain 10	ADAM10	102	15q22													0.000319	-2.63158
Hs.172052	serine/threonine kinase 18	STK18	10733	4q27-q28					0.000796	1.96	0.000989	1.81
Hs.172081	phosphodiesterase 4D, cAMP-specific (phosphodiesterase E3 dunce homolog, Drosophila)	PDE4D	5144	5q12					0.000977	3.21	0.00023	3.21	0.000388	2.23
Hs.172207	non-POU domain containing, octamer-binding	NONO	4841	Xq13.1									0.000607	-2.43902
Hs.172280	SWI/SNF related, matrix associated, actin dependent regulator of chromatin, subfamily c, member 1	SMARCC1	6599	3p23-p21					1.48e-05	2.96	0.000255	2.58
Hs.172422	ESTs, Weakly similar to A43932 mucin 2 precursor, intestinal - human (fragments) [H.sapiens]																0.000593	1.72
Hs.172572	ankyrin repeat domain 10	ANKRD10	55608	13q33.3									4.76e-05	-2.5641
Hs.172648	distal-less homeobox 4	DLX4	1748	17q21.33					0.000425	2.28	7.03e-05	2.52
Hs.172673	S-adenosylhomocysteine hydrolase	AHCY	191	20cen-q13.1			9.5e-05	2.53
Hs.172674	nuclear factor of activated T-cells, cytoplasmic, calcineurin-dependent 3	NFATC3	4775	16q22.2													0.000988	-1.75439
Hs.172777	baculoviral IAP repeat-containing 4	BIRC4	331	Xq25			8.52e-06	3.3
Hs.172801	isoleucine-tRNA synthetase	IARS	3376	9q21													0.000417	-1.92308	0.00058	-1.78571
Hs.172816	neuregulin 1	NRG1	3084	8p21-p12									0.000731	2.04
Hs.172851	arginase, type II	ARG2	384	14q24.1-q24.3													0.000794	-3.44828	0.000835	-3.33333
Hs.172887	phytanoyl-CoA hydroxylase (Refsum disease)	PHYH	5264	10pter-p11.2					9.5e-05	2.25	0.000131	2.1
Hs.172979	zinc finger protein 177	ZNF177	7730	19p13.2													0.000764	-16.6667	0.00046	-12.5
Hs.173034	amphiphysin (Stiff-Man syndrome with breast cancer 128kDa autoantigen)	AMPH	273	7p14-p13			4.83e-05	4.28
Hs.173048	ring finger protein 7	RNF7	9616	3q22-q24					2.6e-05	2.04	7.19e-05	1.9
Hs.173135	dual-specificity tyrosine-(Y)-phosphorylation regulated kinase 2	DYRK2	8445	12q14.2									0.00067	1.53
Hs.173159	transforming, acidic coiled-coil containing protein 1	TACC1	6867	8p11			9.33e-06	-5			0.000896	-3.84615
Hs.173448	likely ortholog of mouse five SH3 domains	FISH	9644	10q24.32					1.39e-05	2.54	3.47e-07	2.54
Hs.173705	Homo sapiens cDNA: FLJ22050 fis, clone HEP09454.						0.000821	-3.44828									0.000862	-2.43902
Hs.17384	Homo sapiens cDNA FLJ37755 fis, clone BRHIP2023762.				3.97e-06	12.05	2.88e-05	9.49	3.59e-10	11.73	9.03e-13	11.15
Hs.173859	frizzled homolog 7 (Drosophila)	FZD7	8324	2q33									1.64e-05	4.61
Hs.173946	hypothetical protein FLJ10486	FLJ10486	55149	10p11.23					0.000478	1.92	0.000686	1.81
Hs.174188	neuron navigator 3	NAV3	89795				0.000121	-3.22581	0.000172	-2.5641
Hs.174220	cytochrome P450, family 2, subfamily C, polypeptide 8	CYP2C8	1558	10q23.33									0.000109	2.3
Hs.175681	Homo sapiens cDNA FLJ12743 fis, clone NT2RP2000678.												0.000568	2.5
Hs.176658	aquaporin 8	AQP8	343	16p12					0.000629	1.95	0.000133	2
Hs.177486	amyloid beta (A4) precursor protein (protease nexin-II, Alzheimer disease)	APP	351	21q21.3													0.000796	-3.57143
Hs.177664	family with sequence similarity 13, member A1	FAM13A1	10144	4q22.1													0.00033	-2.43902
Hs.178281	bromodomain, testis-specific	BRDT	676	1p22.1									0.00027	3
Hs.178292	protein O-fucosyltransferase 1	POFUT1	23509	20q11			3.35e-06	3.87
Hs.178393	ESTs								0.000603	3.26	1.94e-05	3.42
Hs.178728	methyl-CpG binding domain protein 3	MBD3	53615	19p13.3											0.00066	-2.94118			4.87e-05	-2.5641
Hs.17893	rab interacting lysosomal protein	RILP	83547	17p13.3			2.11e-06	4.05	1.89e-11	4.68	9.59e-07	4.44
Hs.179312	small nuclear RNA activating complex, polypeptide 1, 43kDa	SNAPC1	6617	14q22									0.000446	2.26
Hs.17936	DKFZP434H132 protein	DKFZP434H132	25958	15q22.33									8.26e-05	2.24
Hs.179909	nuclear receptor coactivator 6 interacting protein	NCOA6IP	96764	8q11											0.000411	1.4			0.000388	1.55
Hs.180121	postmeiotic segregation increased 2-like 9	PMS2L9	5387	7q11.23	3.63e-05	-5.55556	8.95e-05	-4.34783	5.79e-07	-4.7619	4.72e-09	-4.7619
Hs.180394	signal recognition particle 14kDa (homologous Alu RNA binding protein)	SRP14	6727	15q22									0.000279	1.72
Hs.180570	cytochrome P450, family 4, subfamily F, polypeptide 12	CYP4F12	66002	19p13.1									0.000154	1.58
Hs.180866	interferon gamma receptor 1	IFNGR1	3459	6q23-q24													0.000285	-4	0.000145	-3.57143
Hs.180871	protein kinase C, alpha binding protein	PRKCABP	9463	22q13.1									0.000591	2.75
Hs.180895	RNA binding motif protein 12	RBM12	10137	20q11.21									0.000681	-1.53846
Hs.180948	KIAA0570 gene product	KIAA0570	9736	2p14			0.000729	-1.96078
Hs.181289	elastase 3A, pancreatic (protease E)	ELA3A	10136	1p36.12	0.000235	3.5	0.000304	3.52	4.81e-08	3.44	8.94e-11	3.47
Hs.1813	solute carrier family 18 (vesicular monoamine), member 2	SLC18A2	6571	10q25													0.000306	-1.44928
Hs.1817	myeloperoxidase	MPO	4353	17q23.1			1.32e-06	5.24
Hs.182575	solute carrier family 15 (H+/peptide transporter), member 2	SLC15A2	6565	3q13.33					2.36e-05	3.04	8.25e-06	3.03
Hs.182595	dynein, axonemal, light polypeptide 4	DNAL4	10126	22q13.1									0.000663	-2.7027
Hs.182625	VAMP (vesicle-associated membrane protein)-associated protein B and C	VAPB	9217	20q13			4.55e-05	6.21	2.31e-09	5.54	7.75e-08	5.96
Hs.183109	monoamine oxidase A	MAOA	4128	Xp11.4-p11.3									0.000429	-3.84615					0.000119	-2.94118
Hs.183171	hypothetical protein FLJ22002	FLJ22002	79896	10p12.1			0.000496	3.65			0.000742	3.34
Hs.183362	hypothetical protein FLJ20535	FLJ20535	54970	11q23.2									0.000559	-8.33333
Hs.183706	adducin 1 (alpha)	ADD1	118	4p16.3					0.000231	-1.81818	0.000255	-1.78571
Hs.183765	Homo sapiens cDNA FLJ14241 fis, clone OVARC1000533.														8.43e-06	-16.6667	3.54e-09	-16.6667	1.81e-09	-14.2857
Hs.183868	glucuronidase, beta	GUSB	2990	7q21.11									0.00023	-2.85714			7.66e-05	-2.17391	0.000175	-2.04082
Hs.184014	ribosomal protein L31	RPL31	6160	2q11.2															0.000843	-2.27273
Hs.184222	Down syndrome critical region gene 1	DSCR1	1827	21q22.12													5.82e-05	-6.25	9.98e-05	-6.66667
Hs.184326	CDC10 cell division cycle 10 homolog (S. cerevisiae)	CDC10	989	7p14.3-p14.1			0.000548	-1.78571
Hs.184339	maternal embryonic leucine zipper kinase	MELK	9833	9p13.1			7.18e-06	16.96	1.68e-05	17.01	6.78e-06	15.22
Hs.184352	pericentrin 1	PCNT1	79902	17q25.2					0.000151	3.71	7.93e-06	3.52
Hs.184507	zymogen granule protein 16	ZG16	123887	16p12.1									0.000333	3.02
Hs.185055	BENE protein	BENE	7851	2q13									0.000583	3.21
Hs.185553	ESTs																0.000975	2.08
Hs.186347	ESTs												0.000235	3.55
Hs.18676	sprouty homolog 2 (Drosophila)	SPRY2	10253	13q22.1			1.19e-06	-7.69231	0.000574	-5.88235	0.000863	-5.55556
Hs.1872	phosphoenolpyruvate carboxykinase 1 (soluble)	PCK1	5105	20q13.31	0.000162	4.94					0.000604	3.5
Hs.187266	ESTs												3.77e-05	2.08
Hs.187908	ESTs, Weakly similar to hypothetical protein FLJ20378 [Homo sapiens] [H.sapiens]																0.000372	2.22
Hs.188388	ESTs				0.00063	-2.85714	8.59e-05	-3.125	1.42e-08	-3.33333	1.22e-10	-3.125
Hs.188727	ESTs								0.000374	3.25	0.000824	2.96	0.000452	2.33
Hs.188882	Homo sapiens clone 23872 mRNA sequence												0.000967	-2.94118
Hs.18903	ESTs						0.000871	-1.81818
Hs.190398	ESTs, Moderately similar to KIAA0377 gene product [Homo sapiens] [H.sapiens]												4.42e-05	2.29			2.43e-05	2.01
Hs.19058	ESTs, Weakly similar to hypothetical protein FLJ20489 [Homo sapiens] [H.sapiens]																0.000185	1.93
Hs.19122	eukaryotic translation initiation factor 4E-like 3	EIF4EL3	9470	2q37.1									0.000928	-11.1111
Hs.192050	ESTs, Weakly similar to O Chain O, Beta-Galactosidase (Chains I-P) [E. coli]												0.000641	3.08
Hs.192760	kinesin family member 5A	KIF5A	3798	12q13									0.0008	2.81
Hs.193065	likely ortholog of mouse widely-interspaced zinc finger motifs	WIZ	58525	19p13.1			0.000668	2.89	1.87e-05	3.12	1.41e-05	2.92
Hs.193313	NADH dehydrogenase (ubiquinone) 1, subcomplex unknown, 2, 14.5kDa	NDUFC2	4718	11q13.3					0.000172	3.05	0.000839	2.89	0.000454	1.52
Hs.19333	hypothetical protein FLJ10349	FLJ10349	54707	1p35.3			1.3e-06	3.13
Hs.193377	solute carrier family 14 (urea transporter), member 2	SLC14A2	8170	18q12.1-q21.1									0.000248	-5.88235
Hs.193406	hypothetical protein LOC284465	LOC284465	284465	1p13.1									0.000803	1.78
Hs.193665	solute carrier family 28 (sodium-coupled nucleoside transporter), member 2	SLC28A2	9153	15q15									0.00069	-5.88235
Hs.193725	proteasome (prosome, macropain) 26S subunit, non-ATPase, 5	PSMD5	5711	9q33.3									0.000828	-4
Hs.193914	GREB1 protein	GREB1	9687	2p25.1															7.49e-05	-2.27273
Hs.19405	caspase recruitment domain family, member 4	CARD4	10392	7p15-p14									0.000645	1.68
Hs.194061	ets variant gene 2	ETV2	2116	19q13.11			0.000365	3.29	0.000169	3.44	1.83e-05	3.37
Hs.194101	Homo sapiens cDNA: FLJ20869 fis, clone ADKA02377.						9.97e-06	3.66
Hs.194286	ribosomal protein S6 kinase-like 1	RPS6KL1	83694	14q24.2			1.83e-06	6.94	0.000635	5.72	1.48e-05	6.14	0.00027	2.84
Hs.194382	ataxia telangiectasia mutated (includes complementation groups A, C and D)	ATM	472	11q22-q23	0.000292	-2					0.000429	-1.96078
Hs.194397	Homo sapiens mRNA; cDNA DKFZp762N156 (from clone DKFZp762N156)																0.000661	-2.04082
Hs.194609	Homo sapiens, clone MGC:26991 IMAGE:4826722, mRNA, complete cds												0.000328	3.34
Hs.194665	DNA2 DNA replication helicase 2-like (yeast)	DNA2L	1763	10q21.3-q22.1			0.000828	2.9	0.000356	2.45	2.03e-05	2.63
Hs.194673	phosphoprotein enriched in astrocytes 15	PEA15	8682	1q21.1					0.000455	2.22
Hs.194679	WNT1 inducible signaling pathway protein 2	WISP2	8839	20q12-q13.1									0.000549	1.85
Hs.194688	bromodomain adjacent to zinc finger domain, 1B	BAZ1B	9031	7q11.23					0.000251	3.4			9.54e-05	3.16
Hs.194777	meprin A, beta	MEP1B	4225	18q12.2-q12.3					6.68e-05	2.94	3.43e-07	2.97
Hs.19492	protocadherin 8	PCDH8	5100	13q14.3-q21.1					0.000962	3.57			0.000409	4.93
Hs.19523	hypothetical protein FLJ38663	FLJ38663	91574	12q24.31					8.81e-05	3.12	1.41e-06	3.08
Hs.1955	serum amyloid A4, constitutive	SAA4	6291	11p15.1-p14			0.000476	4.06	2.33e-05	6.49	4.7e-05	5.87
Hs.19699	Conserved gene telomeric to alpha globin cluster	CGTHBA	8131	16p13.3					0.000324	-1.81818	0.000582	-1.81818
Hs.197114	serine/arginine repetitive matrix 2	SRRM2	23524	16p13.3			2.07e-08	3.79
Hs.198166	activating transcription factor 2	ATF2	1386	2q32					0.000741	-1.66667
Hs.198296	SWI/SNF related, matrix associated, actin dependent regulator of chromatin, subfamily a, member 2	SMARCA2	6595	9p22.3			9.16e-07	-2.94118
Hs.198308	tryptophan rich basic protein	WRB	7485	21q22.3									0.000249	-1.5625			4.46e-05	-1.85185	1.73e-05	-1.75439
Hs.19904	cystathionase (cystathionine gamma-lyase)	CTH	1491	1p31.1					0.0008	2.44
Hs.199160	myeloid/lymphoid or mixed-lineage leukemia (trithorax homolog, Drosophila)	MLL	4297	11q23					6.72e-05	3.18	1.6e-05	2.8
Hs.20137	BMP-2 inducible kinase	BIKE	55589	4q21.21									0.000765	-7.14286
Hs.201398	C1q and tumor necrosis factor related protein 1	C1QTNF1	114897	17q25.3									0.000214	2.43
Hs.201675	RNA binding motif protein 5	RBM5	10181	3p21.3					6.46e-05	-2.63158	6.47e-05	-2.5641					0.000464	-5
Hs.20185	chromosome 17 open reading frame 31	C17orf31	23293	17p13.3									3.79e-05	-7.69231
Hs.20274	solute carrier family 41, member 1	SLC41A1	254428	1q32.1					0.000518	2.88
Hs.20295	CHK1 checkpoint homolog (S. pombe)	CHEK1	1111	11q24-q24					0.000321	3.3
Hs.203	cholecystokinin B receptor	CCKBR	887	11p15.4									4.03e-07	2.54
Hs.2030	thrombomodulin	THBD	7056	20p12-cen			3.19e-06	-3.0303	0.00029	-2.32558	0.000714	-2.32558
Hs.203013	hypothetical protein FLJ12748	FLJ12748	79929	3q27.3			7.77e-06	4.48	0.000217	4.24	3.29e-05	4.32
Hs.203420	tyrosine kinase, non-receptor, 1	TNK1	8711	17p13.1									0.000461	1.51
Hs.20478	ceroid-lipofuscinosis, neuronal 2, late infantile (Jansky-Bielschowsky disease)	CLN2	1200	11p15									0.000361	-5.55556
Hs.205146	EST						2.16e-05	3.79
Hs.20575	hypothetical protein LOC283431	LOC283431	283431	12q23.3									5.95e-05	1.89			0.000805	1.49
Hs.2062	vitamin D (1,25- dihydroxyvitamin D3) receptor	VDR	7421	12q12-q14									0.000955	1.57
Hs.206501	hypothetical protein from clone 643	LOC57228	57228	12q13.12	5.05e-05	5.03	6.51e-06	5.08	1.98e-06	5.14	6.63e-09	5.1
Hs.20695	Rho guanine nucleotide exchange factor (GEF) 10	ARHGEF10	9639	8p23			0.000494	-4	2.88e-05	-3.84615	1.19e-05	-3.84615					9.82e-05	-3.44828	0.000444	-2.77778
Hs.207481	ESTs						1.69e-05	3.98
Hs.2077	zinc finger protein 8 (clone HF.18)	ZNF8	7554	19q13.43			3.29e-06	4.68	0.000114	3.93	4.38e-05	4.14
Hs.2083	CDC-like kinase 1	CLK1	1195	2q33					6.67e-06	-3.57143	0.000142	-3.0303
Hs.20894	N-deacetylase/N-sulfotransferase (heparan glucosaminyl) 1	NDST1	3340	5q33.1			4.27e-05	-2.22222
Hs.209119	1-acylglycerol-3-phosphate O-acyltransferase 2 (lysophosphatidic acid acyltransferase, beta)	AGPAT2	10555	9q34.3					0.000943	-1.81818
Hs.20969	solute carrier family 26, member 8	SLC26A8	116369	6p21			1.26e-08	6.34	6.72e-05	4.9	6.91e-06	5.39
Hs.211573	heparan sulfate proteoglycan 2 (perlecan)	HSPG2	3339	1p36.1-p35			0.000212	-4.16667
Hs.211575	interferon, alpha 2	IFNA2	3440	9p22									0.000952	2.19
Hs.211592	protein kinase C, epsilon	PRKCE	5581	2p21													7.41e-05	1.46	0.00017	1.38
Hs.211610	CUG triplet repeat, RNA binding protein 2	CUGBP2	10659	10p13			0.000768	-6.66667	0.000327	-4.54545	0.000307	-5.26316
Hs.21189	DnaJ (Hsp40) homolog, subfamily A, member 2	DNAJA2	10294	16q11.1-q11.2					0.000576	1.84
Hs.2133	retinal pigment epithelium-specific protein 65kDa	RPE65	6121	1p31									0.000977	-7.14286
Hs.21454	chromosome 14 open reading frame 75	C14orf75	122402	14q32.33									0.000593	2.67
Hs.21492	phosphatidylinositol (4,5) bisphosphate 5-phosphatase, A	PIB5PA	27124	22q11.2-q13.2	1e-06	4.92	2.87e-07	5.26	0.000141	4.82	3.51e-07	4.95
Hs.21537	protein phosphatase 1, catalytic subunit, beta isoform	PPP1CB	5500	2p23															0.000224	-4.34783
Hs.21594	RAS-like, estrogen-regulated, growth-inhibitor	RERG	85004	12p13.1			5.8e-05	-10	0.00021	-5.88235	4.04e-05	-7.14286
Hs.21595	DNA segment on chromosome X and Y (unique) 155 expressed sequence	DXYS155E	8227	Xp22.32									0.000971	-3.125
Hs.21639	nuclear protein, marker for differentiated aortic smooth muscle and down-regulated with vascular injury	APEG1	10290	2q36.1	0.000308	-2.63158					0.000502	-2.38095
Hs.21704	transcription factor 12 (HTF4, helix-loop-helix transcription factors 4)	TCF12	6938	15q21													0.000978	-3.33333
Hs.2173	fucosyltransferase 4 (alpha (1,3) fucosyltransferase, myeloid-specific)	FUT4	2526	11q21													0.000503	1.86
Hs.21812	Homo sapiens mRNA full length insert cDNA clone EUROIMAGE 1499812						0.000548	1.71
Hs.218842	glutamate rich WD repeat protein GRWD	GRWD	83743	19q13.33													0.000899	1.61	0.000943	1.56
Hs.220689	Ras-GTPase-activating protein SH3-domain-binding protein	G3BP	10146	5q33.1			0.000854	-2.08333
Hs.2207	proline rich 3	PROL3	10879	4q13.3					1.02e-05	3.15	0.000463	2.96
Hs.22201	KIAA0774 protein	KIAA0774	23281	13q12.2									0.000555	-5.55556
Hs.2240	secretoglobin, family 1A, member 1 (uteroglobin)	SCGB1A1	7356	11q12.3-q13.1									0.000282	3.2
Hs.22405	leukocyte immunoglobulin-like receptor, subfamily B (with TM and ITIM domains), member 2	LILRB2	10288	19q13.4													0.000296	2.03	0.000415	1.93
Hs.224206	EST																0.000999	1.63
Hs.22464	epilepsy, progressive myoclonus type 2, Lafora disease (laforin)	EPM2A	7957	6q24									0.000323	2.54
Hs.224792	EST				0.000484	3.96	0.0002	3.42	0.000799	3.36	5.89e-06	3.49
Hs.22575	Homo sapiens cDNA: FLJ21042 fis, clone CAE11204.												0.000127	3.15
Hs.22580	alkylglycerone phosphate synthase	AGPS	8540	2q31									0.000142	1.88
Hs.225939	sialyltransferase 9 (CMP-NeuAc:lactosylceramide alpha-2,3-sialyltransferase; GM3 synthase)	SIAT9	8869	2p11.2			0.000743	-3.33333
Hs.22670	chromodomain helicase DNA binding protein 1	CHD1	1105	5q15-q21													8.71e-05	-2.5
Hs.227280	LSM5 homolog, U6 small nuclear RNA associated (S. cerevisiae)	LSM5	23658	7p14.3			0.000125	4	4.41e-06	3.68	2.8e-06	3.69
Hs.227948	serine (or cysteine) proteinase inhibitor, clade B (ovalbumin), member 3	SERPINB3	6317	18q21.3			9.98e-07	6.25	3.15e-10	6.83	1.14e-09	6.44
Hs.2288	visinin-like 1	VSNL1	7447	2p24.3					0.00048	2.94	0.000308	2.79
Hs.228963	EST						5.8e-08	4.99
Hs.22919	putative tumor suppressor	FUS2	24142	3p21.3													0.000645	-2.94118	8.13e-05	-2.85714
Hs.22998	neurexin 1	NRXN1	9378	2p16.3			5.57e-09	-33.3333	3.39e-11	-33.3333	5.12e-11	-25
Hs.23111	phenylalanine-tRNA synthetase-like	FARSL	2193	19p13.2			0.000332	1.67
Hs.23131	kinesin family member C3	KIFC3	3801	16q13-q21			3.95e-07	-4.34783	1.01e-05	-3.44828	0.000802	-3.22581					0.000129	-2.27273
Hs.231571	ESTs						0.000439	3.26
Hs.232400	heterogeneous nuclear ribonucleoprotein A2/B1	HNRPA2B1	3181	7p15									0.000526	-2.94118
Hs.23263	KIAA0350 protein	KIAA0350	23274	16p13.2			4.37e-06	-2.27273	0.000203	-1.78571	6.85e-06	-1.92308
Hs.232767	EST						0.000352	1.96
Hs.233617	Homo sapiens (clone B3B3E13) Huntington's disease candidate region mRNA fragment.												0.000901	2.84
Hs.234149	hypothetical protein FLJ20647	FLJ20647	55013	4q25									0.000893	2.51
Hs.234265	DKFZP586G011 protein	LAP1B	26092	1q24.2			0.000907	-1.92308
Hs.23467	neuron navigator 2	NAV2	89797	11p15.1			0.000606	3.99
Hs.234773	ecotropic viral integration site 1	EVI1	2122	3q24-q28									0.000963	-4.54545			0.000237	-2.85714	0.000408	-2.7027
Hs.23518	hypothetical protein from BCRA2 region	CG005	10443	13q12-q13													0.000306	-3.44828	0.000422	-2.94118
Hs.236449	hypothetical protein FLJ22757	FLJ22757	79958	19p13.3					0.000644	-1.66667
Hs.236810	HMG2 like	LOC127540	127540	1p34.3					3.54e-10	3.22	4.1e-06	3.14
Hs.237506	DnaJ (Hsp40) homolog, subfamily B, member 5	DNAJB5	25822	9p13.1									0.000731	3.14
Hs.23862	phytoceramidase, alkaline	PHCA	55331	11q13.3									0.000927	1.85
Hs.23889	SAM domain and HD domain 1	SAMHD1	25939	20pter-q12					3.97e-06	5.42	4.26e-05	4.33
Hs.239106	solute carrier family 3 (cystine, dibasic and neutral amino acid transporters, activator of cystine, dibasic and neutral amino acid transport), member 1	SLC3A1	6519	2p16.3									9.94e-05	3.63
Hs.239189	glutaminase	GLS	2744	2q32-q34			1.19e-05	-4.7619	1.89e-06	-4.54545	6.25e-07	-4.34783
Hs.239356	syntaxin binding protein 1	STXBP1	6812	9q34.1			1.73e-05	-2.5641	0.000637	-2.08333							0.0007	-1.69492
Hs.239459	regulatory solute carrier protein, family 1, member 1	RSC1A1	6248	1p36.1	0.000998	2.52			0.000391	2.57	0.000501	2.38	0.000137	2.68
Hs.23960	cyclin B1	CCNB1	891	5q12					0.000425	2.66
Hs.239625	integral membrane protein 2B	ITM2B	9445	13q14.3			7.6e-05	-3.125
Hs.239727	desmocollin 2	DSC2	1824	18q12.1									0.000972	-1.63934
Hs.239752	nuclear receptor subfamily 2, group F, member 6	NR2F6	2063	19p13.1			0.000148	9.04	2.66e-05	6.39	0.000466	5.59
Hs.239818	phosphoinositide-3-kinase, catalytic, beta polypeptide	PIK3CB	5291	3q22.3									0.000514	2.59
Hs.23994	activin A receptor, type IIB	ACVR2B	93	3p22					4.54e-05	3.1	0.000445	3.01
Hs.240	M-phase phosphoprotein 1	MPHOSPH1	9585	10q23.31											0.000337	1.44			0.000546	1.67
Hs.24024	guanine nucleotide exchange factor for Rap1	GRP3	25780	2p25.1-p24.1													0.000748	1.81
Hs.24048	FK506 binding protein 11, 19 kDa	FKBP11	51303	12q13.11					0.000629	-2.12766
Hs.241257	latent transforming growth factor beta binding protein 1	LTBP1	4052	2p22-p21					1.5e-05	6.16	0.000124	5.61
Hs.24143	Homo sapiens, clone IMAGE:5264268, mRNA								0.0002	2.08
Hs.24183	Homo sapiens mRNA; cDNA DKFZp667N1113 (from clone DKFZp667N1113)										6.62e-05	2.81	0.000411	2.5			0.000359	2.19	0.000454	2.05
Hs.2430	transcription factor-like 1	TCFL1	6944	1q21					6.19e-05	5.1	6.54e-05	5.04
Hs.24341	transcriptional co-activator with PDZ-binding motif (TAZ)	TAZ	25937	3q23-q24	0.00037	8.13	8.17e-05	5.34	9.87e-08	4.48	1.39e-07	5.29
Hs.245537	Homo sapiens cDNA FLJ35642 fis, clone SPLEN2012523.												0.000899	2.27
Hs.245710	heterogeneous nuclear ribonucleoprotein H1 (H)	HNRPH1	3187	5q35.3													0.000133	-5.26316	0.000127	-4.7619
Hs.24656	KIAA0907 protein	KIAA0907	22889	1q21.3					0.000112	2.88	0.0002	2.7
Hs.24792	chromosome 12 open reading frame 5	C12orf5	57103	12p13.3					0.000335	2.49
Hs.248267	mercaptopyruvate sulfurtransferase	MPST	4357	22q13.1									0.000167	2.03
Hs.2488	lymphocyte cytosolic protein 2 (SH2 domain containing leukocyte protein of 76kDa)	LCP2	3937	5q33.1-qter			1.05e-05	-2.12766
Hs.24907	coronin, actin binding protein, 2B	CORO2B	10391	15q22.31			6.75e-05	-3.125	1.26e-05	-3.22581	1.11e-06	-3.125
Hs.249141	glutamate receptor, ionotropic, kainate 5	GRIK5	2901	19q13.2			0.000394	4.18	0.000174	2.75	2.76e-05	3.11
Hs.249227	ATPase, H+ transporting, lysosomal 13kDa, V1 subunit G isoform 2	ATP6V1G2	534	6p21.3			0.000505	4.35
Hs.24969	gamma-aminobutyric acid (GABA) A receptor, alpha 5	GABRA5	2558	15q11.2-q12			0.000122	2.28
Hs.25040	zinc finger protein 239	ZNF239	8187	10q11.22-q11.23									2.58e-05	2.65
Hs.250615	cytochrome P450, family 2, subfamily A, polypeptide 7	CYP2A7	1549	19q13.2									0.000512	2.07
Hs.250651	H factor 1 (complement)	HF1	3075	1q32			0.000944	-2.63158
Hs.250712	calcium channel, voltage-dependent, beta 3 subunit	CACNB3	784	12q13					4.51e-06	-2.38095	2.52e-05	-2.22222	9.94e-05	-2
Hs.25199	hypothetical protein HSPC242	HSPC242	51537	22q					0.000206	2.67	0.000237	2.5
Hs.25204	chondroitin 4-O-sulfotransferase 2	C4S-2	55501	7p22			3.47e-06	4.52	0.000417	4.49	1.5e-05	4.63
Hs.25206	phospholipase A2, group XII	PLA2G12	81579	4q25									0.000475	-5.88235
Hs.252280	Rho guanine nucleotide exchange factor (GEF) 1	ARHGEF1	9138	19q13.13									0.000556	-2.22222			0.00068	-1.85185
Hs.2523	alcohol dehydrogenase 1C (class I), gamma polypeptide	ADH1C	126	4q21-q23			2.55e-05	-5	0.000413	-3.7037	7.36e-05	-4
Hs.252587	pituitary tumor-transforming 1	PTTG1	9232	5q35.1			0.000169	3.39
Hs.252692	hypothetical protein FLJ20343	FLJ20343	54902	17p11.2									1e-05	-2.94118			2.58e-05	-2.5	4.66e-06	-2.38095
Hs.252938	ESTs						4.68e-05	-3.57143	6.11e-05	-2.94118	0.000102	-3.0303
Hs.25475	aquaporin 7	AQP7	364	9p13									0.000311	3.45
Hs.25515	MCF.2 cell line derived transforming sequence-like	MCF2L	23263	13q34			7.96e-05	4.84
Hs.2556	tumor necrosis factor receptor superfamily, member 17	TNFRSF17	608	16p13.1					0.000849	2.19	0.000807	2.21
Hs.2561	nerve growth factor, beta polypeptide	NGFB	4803	1p13.1									0.000118	2.51
Hs.25619	death-associated protein kinase 3	DAPK3	1613	19p13.3	6.34e-05	5.04	1.44e-06	4.44	0.000165	3.89	1.08e-06	4.23
Hs.25647	v-fos FBJ murine osteosarcoma viral oncogene homolog	FOS	2353	14q24.3													0.000188	-20	0.000124	-16.6667
Hs.25691	receptor (calcitonin) activity modifying protein 3	RAMP3	10268	7p13-p12					1.91e-05	3.24	3.86e-06	3.11
Hs.25717	Homo sapiens cDNA: FLJ23454 fis, clone HSI06959.												0.000135	2.87
Hs.258494	hypothetical protein MGC16044	MGC16044	91523	12q13.11			6.63e-05	-2.38095
Hs.258576	claudin 12	CLDN12	9069	7q21													0.000846	1.76
Hs.26045	protein tyrosine phosphatase, receptor type, A	PTPRA	5786	20p13					0.000206	1.65	2.59e-05	1.64
Hs.261134	hypothetical protein FLJ10737	FLJ10737	55735	1p36.23			2.74e-08	6.7	0.000756	4.18	0.000501	4.44
Hs.261285	pleiotropic regulator 1 (PRL1homolog, Arabidopsis)	PLRG1	5356	4q31.2-q32.1	8.66e-05	3.46	3.64e-05	3.51	1.83e-06	4.36	9.86e-08	3.95
Hs.26146	Down syndrome critical region gene 3	DSCR3	10311	21q22.2			0.000195	-1.92308
Hs.26163	KIAA0649 gene product	KIAA0649	9858	9q34.3			9.38e-06	4.87	4.43e-09	4.55	5.11e-08	4.32
Hs.26244	hypothetical protein FLJ10052	FLJ10052	55061	1q42.12					0.000229	3.4	0.000146	3.19
Hs.26285	nischarin	NISCH	11188	3p21.1			0.000215	-1.5625
Hs.26369	hypothetical protein FLJ20287	FLJ20287	54881	9q22.33					4.93e-06	4	1.63e-07	3.89
Hs.26441	KIAA0319 gene product	KIAA0319	9856	6p22.3-p22.2									0.000724	3.46
Hs.264750	ectonucleotide pyrophosphatase/phosphodiesterase 3	ENPP3	5169	6q22															0.000405	-3.84615
Hs.264915	hypothetical protein LOC285381	LOC285381	285381	3p24.3			9.19e-05	4.37	7.98e-05	3.54	2.48e-05	3.71
Hs.264981	2'-5'-oligoadenylate synthetase 2, 69/71kDa	OAS2	4939	12q24.2									0.000696	2.09
Hs.2664	flavin containing monooxygenase 4	FMO4	2329	1q23-q25									1.68e-05	1.86
Hs.26670	hypothetical protein MGC17330	MGC17330	113791	22q11.2-q22	0.000215	-2.5641	0.000209	-3.33333			0.000318	-2.38095
Hs.266902	neurotrophin 5 (neurotrophin 4/5)	NTF5	4909	19q13.3									9.57e-05	2.4
Hs.267445	mitogen-activated protein kinase 8	MAPK8	5599	10q11.21	6.74e-05	4.98	0.000474	4.64	1.89e-07	4.07	2.69e-08	4.38
Hs.26813	CDA14	LOC51290	51290	12p11.22			4.3e-05	-2.38095					7.58e-06	-6.66667
Hs.268177	phospholipase C, gamma 1 (formerly subtype 148)	PLCG1	5335	20q12-q13.1			3.48e-07	6.38			0.000521	4.71
Hs.26915	spectrin, beta, non-erythrocytic 2	SPTBN2	6712	11q13			0.000199	5.7	0.000272	4.63	0.000335	4.67
Hs.269386	ESTs								0.000182	2.57	3.94e-05	2.53	0.000165	1.87
Hs.26968	Homo sapiens cDNA FLJ38835 fis, clone MESAN2002424.												0.000594	-3.0303
Hs.270312	Homo sapiens, clone IMAGE:5206119, mRNA												3.04e-05	2.96
Hs.27184	growth factor, augmenter of liver regeneration (ERV1 homolog, S. cerevisiae)	GFER	2671	16p13.3-p13.12									0.000303	2.12
Hs.272458	protein phosphatase 3 (formerly 2B), catalytic subunit, alpha isoform (calcineurin A alpha)	PPP3CA	5530	4q21-q24													0.000564	-2.17391	0.000539	-2.04082
Hs.272891	hippocalcin like 4	HPCAL4	51440	1p34.2					2.38e-05	2.92	2.56e-07	3.08
Hs.273	galactosylceramidase (Krabbe disease)	GALC	2581	14q31															0.000714	-2.94118
Hs.27311	single-minded homolog 2 (Drosophila)	SIM2	6493	21q22.13									0.000776	2.21
Hs.27410	papillomavirus regulatory factor PRF-1	LOC55893	55893	8p21.1	9.35e-05	-3.57143	3.95e-05	-3.44828	4.07e-07	-3.44828	1.13e-08	-3.44828
Hs.27414	hypothetical protein HSU79275	HSU79275	27105	12q13.1									0.000651	3.83
Hs.274184	transcription factor binding to IGHM enhancer 3	TFE3	7030	Xp11.22											3.93e-05	-1.33333
Hs.274230	3'-phosphoadenosine 5'-phosphosulfate synthase 2	PAPSS2	9060	10q23-q24			4.49e-07	-4	0.000106	-3.0303	2.17e-05	-3.22581
Hs.2743	keratin, cuticle, ultrahigh sulphur 1	KRN1	3846	11q13.5									0.000574	1.9
Hs.274313	insulin-like growth factor binding protein 6	IGFBP6	3489	12q13			6.27e-05	-5
Hs.274407	protease, serine, 16 (thymus)	PRSS16	10279	6p21					0.000211	2.73
Hs.275675	katanin p80 (WD40-containing) subunit B 1	KATNB1	10300	16q12.2									0.000822	-3.57143			0.000436	-2.43902	0.000159	-2.5
Hs.275775	selenoprotein P, plasma, 1	SEPP1	6414	5q31											0.000181	-4.16667
Hs.275924	dystrophia myotonica-containing WD repeat motif	DMWD	1762	19q13.3									0.00076	4.36
Hs.27621	sema domain, seven thrombospondin repeats (type 1 and type 1-like), transmembrane domain (TM) and short cytoplasmic domain, (semaphorin) 5A	SEMA5A	9037	5p15.2			0.000645	-1.96078
Hs.278	pre-T/NK cell associated protein	1D12A	9594	8p12					1.06e-07	9.1	1.03e-07	8.34
Hs.278255	homeo box D4	HOXD4	3233	2q31.1									0.000162	2.74
Hs.278430	cytochrome P450, family 21, subfamily A, polypeptide 2	CYP21A2	1589	6p21.3			0.000132	-2.7027	4.31e-05	-2.63158	1.08e-05	-2.5641
Hs.278573	CD59 antigen p18-20 (antigen identified by monoclonal antibodies 16.3A5, EJ16, EJ30, EL32 and G344)	CD59	966	11p13									0.000272	-2.08333
Hs.278607	ubiquitin activating enzyme E1-like protein	GSA7	10533	3p25.2			4.81e-05	-1.66667			0.000954	-1.51515
Hs.278657	macrophage stimulating, pseudogene 9	MSTP9	11223	1p36.13			0.000475	-6.25	2.83e-05	-7.69231	0.000107	-6.66667
Hs.278857	heterogeneous nuclear ribonucleoprotein H2 (H')	HNRPH2	3188	Xq22													0.000689	-2.63158
Hs.279008	hypothetical protein FLJ20170	FLJ20170	54844	6q22.31									0.00049	2.58
Hs.27954	CD86 antigen (CD28 antigen ligand 2, B7-2 antigen)	CD86	942	3q21					9.34e-05	4.27	0.000729	3.64
Hs.279611	deleted in malignant brain tumors 1	DMBT1	1755	10q25.3-q26.1			2.3e-06	4.78
Hs.279696	DKFZP566I1024 protein	DKFZP566I1024	25870	7q11.1					0.000125	2.26	0.000391	2.17
Hs.279766	kinesin family member 4A	KIF4A	24137	Xq13.1			2.48e-05	6.1	3.34e-06	7.27	3.63e-06	6.28
Hs.279912	KIAA0419 gene product	KIAA0419	9738	16p13.11			1.63e-06	4.72
Hs.281428	periphilin 1	PPHLN1	51535	12q12					0.0009	2.12
Hs.2815	POU domain, class 6, transcription factor 1	POU6F1	5463	12			0.000643	-1.5625
Hs.281587	Human (clone CTG-A4) mRNA sequence.																0.000183	-2.94118	0.000433	-2.5
Hs.282975	carboxylesterase 2 (intestine, liver)	CES2	8824	16q21			0.000871	-1.49254
Hs.2830	myogenin (myogenic factor 4)	MYOG	4656	1q31-q41									0.000465	3.16
Hs.283110	carbonic anhydrase X	CA10	56934	17q21			6.22e-07	3.92	6.02e-11	4.18	1.05e-09	4.09
Hs.283609	muscleblind-like 2 (Drosophila)	MBNL2	10150	13q32.1									0.000943	-9.09091
Hs.283664	aspartate beta-hydroxylase	ASPH	444	8q12.1			0.000249	-3.0303
Hs.283749	ribonuclease, RNase A family, 4	RNASE4	6038	14q11.1			8.05e-05	-5.55556	0.00056	-5.55556	0.000393	-5.26316
Hs.283771	chromosome 21 open reading frame 66	C21orf66	94104	21q21.3	0.000949	-2.04082			2.35e-06	-2.5641	3.34e-05	-2.32558
Hs.2839	Norrie disease (pseudoglioma)	NDP	4693	Xp11.4											4.8e-05	-2.7027	9.57e-05	-2.32558	8.84e-07	-2.5
Hs.283930	Homo sapiens HSPC082 mRNA, partial cds												0.000211	3.49
Hs.284157	KIAA1200 protein	KIAA1200	57475	14q23.3	0.000397	1.61
Hs.284251	mahogunin, ring finger 1	MGRN1	23295	16p13.3			2.04e-08	4.09
Hs.284275	Homo sapiens, clone IMAGE:6058556, mRNA								0.000531	1.63
Hs.284291	sorting nexin 6	SNX6	58533	14q12					0.000879	1.55
Hs.284394	complement component 3	C3	718	19p13.3-p13.2					0.000941	-4.7619
Hs.28491	spermidine/spermine N1-acetyltransferase	SAT	6303	Xp22.1													0.000174	-5	0.000246	-4.16667
Hs.285363	ESTs, Weakly similar to NAL2_HUMAN NACHT-, LRR- and PYD-containing protein 2 (Nucleotide-binding site protein 1) [H.sapiens]												0.000814	2.84
Hs.285401	colony stimulating factor 2 receptor, beta, low-affinity (granulocyte-macrophage)	CSF2RB	1439	22q13.1									0.000257	-1.96078
Hs.285671	bone morphogenetic protein 6	BMP6	654	6p24-p23									0.000288	2.58
Hs.28578	muscleblind-like (Drosophila)	MBNL1	4154	3q25			0.000619	-2.27273
Hs.285818	similar to Caenorhabditis elegans protein C42C1.9	KEO4	10613	10q21-q22													0.000262	-2.17391	0.000256	-2.04082
Hs.285864	ESTs														1.58e-05	-2.22222
Hs.286035	myosin XVB, pseudogene	MYO15B	80022	17q25.2									5.94e-05	2.68
Hs.286084	centaurin, gamma 3	CENTG3	116988	7q36.1									0.000437	-2.12766
Hs.286184	chromosome 20 open reading frame 177	C20orf177	63939	20q13.2-q13.33									0.000416	2.42
Hs.287820	fibronectin 1	FN1	2335	2q34			4.88e-05	-5.88235			0.000881	-4.7619
Hs.28783	KIAA1223 protein	KIAA1223	57182	4q28.1					9.8e-06	3.09	2.1e-06	2.88
Hs.288042	hypothetical protein FLJ14299	FLJ14299	80139	8p11.22									0.000963	-4
Hs.288141	SECIS binding protein 2	SBP2	79048	9q22.1					5.25e-05	-2.7027	9.48e-05	-2.43902
Hs.288193	karyopherin alpha 4 (importin alpha 3)	KPNA4	3840	3q25.33	0.000232	3.7	9.67e-05	3.37
Hs.288232	Homo sapiens cDNA: FLJ22642 fis, clone HSI06970.																0.000129	-4.16667
Hs.288283	WD-repeat protein	HAN11	10238	17q24.1									9.09e-05	1.89
Hs.288433	neurotrimin	HNT	50863	11q25									4.24e-05	2.15
Hs.288650	aquaporin 4	AQP4	361	18q11.2-q12.1			0.000653	4.39
Hs.288658	zinc finger protein 35 (clone HF.10)	ZNF35	7584	3p22-p21			7.06e-05	4.34	2.11e-06	3.92	9.28e-06	3.83
Hs.288828	fatty acid amide hydrolase	FAAH	2166	1p35-p34									0.000901	2.29
Hs.288929	fused toes homolog (mouse)	FTS	64400	16q12.1									0.000573	-4.34783			0.000258	-5
Hs.288968	RAB22A, member RAS oncogene family	RAB22A	57403	20q13.31			0.000597	1.56
Hs.288995	hypothetical protein FLJ20813	FLJ20813	55044	19q13.43									0.000592	2.91
Hs.289068	Homo sapiens cDNA FLJ11918 fis, clone HEMBB1000272.								2.15e-05	3.69	2.64e-06	3.34
Hs.289099	katanin p60 (ATPase-containing) subunit A 1	KATNA1	11104	6q24.3									0.000336	1.84
Hs.2891	protein kinase C, mu	PRKCM	5587	14q11					0.000281	-2.7027	0.000722	-2.5
Hs.290943	hypothetical protein MGC33974	MGC33974	146330	16p13.3			0.000626	-3.7037
Hs.292057	hypothetical protein LOC222136	LOC222136	222136	7p14.3			1.04e-06	4.36	1.58e-10	4.14	2.63e-09	3.89
Hs.292566	YEA4 protein	YEA	84912	7q33									0.000955	3.83
Hs.292682	Homo sapiens xenobiotic/medium-chain fatty acid:CoA ligase mRNA, complete cds; nuclear gene for mitochondrial product.												0.000167	3.18
Hs.292801	Human S6 A-5 mRNA expressed in chromosome 6-suppressed melanoma cells.																		0.000695	1.82
Hs.29283	Homo sapiens proteoglycan link protein mRNA, complete cds.						0.000847	4.41
Hs.29286	hypothetical protein LOC201514	LOC201514	201514	19q13.43	0.000219	3.18	7.15e-05	3.54			5.19e-05	3.27
Hs.293224	hypothetical protein FLJ32919	FLJ32919	118813	10q24.1									0.000383	2.58
Hs.293267	calpain 3, (p94)	CAPN3	825	15q15.1-q21.1													0.000145	-1.92308
Hs.293539	cortactin binding protein 2	CORTBP2	83992						2.42e-06	3.34	3.92e-06	3.02
Hs.293704	ESTs												0.000242	2.95
Hs.294122	KIAA1805 protein	KIAA1805	84450	2p23									0.000562	-1.49254
Hs.29499	toll-like receptor 3	TLR3	7098	4q35					1.05e-05	3.37	0.00018	2.9
Hs.295789	Homo sapiens mRNA; cDNA DKFZp564D1164 (from clone DKFZp564D1164)												0.00047	-1.6129
Hs.295901	hypothetical protein FLJ23790	FLJ23790	157769	8q24.13					6.45e-05	3.64	6.16e-06	3.46
Hs.295944	tissue factor pathway inhibitor 2	TFPI2	7980	7q22			7.47e-09	-20	9.06e-07	-10	1.76e-05	-9.09091
Hs.296323	serum/glucocorticoid regulated kinase	SGK	6446	6q23													0.000415	-5	0.000219	-4.16667
Hs.296365	zinc finger protein	ZF5128	25799	19q13.43									0.000504	2.22
Hs.29640	reversion-inducing-cysteine-rich protein with kazal motifs	RECK	8434	9p13-p12			0.000806	-1.96078
Hs.296434	erythroid differentiation and denucleation factor 1	HFL-EDDG1	10650	18p11.1									0.000502	3.52
Hs.296585	nucleolar protein 5A (56kDa with KKE/D repeat)	NOL5A	10528	20p13					0.00038	3.56	5.01e-05	3.39
Hs.296634	ceruloplasmin (ferroxidase)	CP	1356	3q23-q25					0.000174	11.41
Hs.296770	KIAA1719 protein	KIAA1719	80852	3p24-p23									0.000522	2.05
Hs.296847	spastic paraplegia 7, paraplegin (pure and complicated autosomal recessive)	SPG7	6687	16q24.3													0.000542	-2.32558
Hs.296865	troponin T2, cardiac	TNNT2	7139	1q32									0.000715	1.96
Hs.29700	hypothetical protein FLJ20094	FLJ20094	54819	5q31.1													0.000426	-2.5641
Hs.29764	wingless-type MMTV integration site family, member 6	WNT6	7475	2q35			0.000104	8.06
Hs.297660	TNF receptor-associated factor 3	TRAF3	7187	14q32.33			2.12e-08	3.85	9.71e-10	4.15	3.68e-10	4
Hs.2979	trefoil factor 2 (spasmolytic protein 1)	TFF2	7032	21q22.3									0.000879	-5.88235
Hs.298184	potassium voltage-gated channel, shaker-related subfamily, beta member 2	KCNAB2	8514	1p36.3					0.000462	2.43
Hs.298476	solute carrier family 26, member 6	SLC26A6	65010	3p21.3	5.45e-05	4.25	4.18e-05	3.18			0.000331	3.28
Hs.2985	emerin (Emery-Dreifuss muscular dystrophy)	EMD	2010	Xq28									0.000919	-2.27273
Hs.29857	hypothetical protein LOC221302	LOC221302	221302	6q22.31			0.000225	4.73			0.000862	3.92
Hs.29981	solute carrier family 26 (sulfate transporter), member 2	SLC26A2	1836	5q31-q34													8.44e-06	-10	0.000554	-7.69231
Hs.301152	hypothetical protein MGC50452	MGC50452	89932	14q24.1													2.22e-05	-5.26316	6.59e-05	-4.34783
Hs.301372	hypothetical protein DKFZp761A132	DKFZp761A132	84256	16p13.3					5.51e-05	-1.92308
Hs.301463	similar to hypothetical protein MGC13138	LOC146542	146542	16p11.2									0.000223	3.18
Hs.301478	KIAA0500 protein	KIAA0500	57237	14q32.2					5.82e-05	3.3	0.000538	2.93
Hs.301651	hypothetical protein FLJ13659	FLJ13659	80264	19p12			1.55e-05	8.02	5.79e-06	8.2	3.53e-07	8.07
Hs.301676	glutamate receptor, ionotropic, kainate 2	GRIK2	2898	6q16.3-q21									0.000297	3.63
Hs.301866	KIAA0819 protein	KIAA0819	23289	22q11.1	0.000946	-2
Hs.302740	transient receptor potential cation channel, subfamily V, member 6	TRPV6	55503	7q33-q34									0.000816	2.26
Hs.30327	mitogen-activated protein kinase-activated protein kinase 5	MAPKAPK5	8550	12q24.13	7.39e-06	4.63	3.41e-06	3.99	8.1e-10	4.23	7.99e-13	4.25
Hs.30332	glutamine-fructose-6-phosphate transaminase 2	GFPT2	9945	5q34-q35			4.98e-07	-5.55556	9.47e-05	-5.55556	3.44e-06	-5.26316
Hs.30340	Nedd4 family interacting protein 2	NDFIP2	54602	13q22.1			0.000104	-2.7027
Hs.3041	uracil-DNA glycosylase 2	UNG2	10309	5p15.2-p13.1													0.000621	-8.33333	0.000431	-6.66667
Hs.30579	Homo sapiens, clone IMAGE:4541768, mRNA						0.000215	-3.125	7.63e-07	-4	1.18e-06	-3.57143
Hs.306094	E1A binding protein p400	EP400	57634	12q24.33									0.000467	-2.04082
Hs.306122	glycoprotein, synaptic 2	GPSN2	9524	19p13.12					6.48e-05	1.87	0.000246	1.75
Hs.30715	potassium voltage-gated channel, Isk-related family, member 3	KCNE3	10008	11q13-q14									0.000418	2.89
Hs.30738	hypothetical protein FLJ10407	FLJ10407	55706	1p32.3			1.48e-05	6.14	3.15e-06	4.73	2.95e-08	4.88
Hs.307871	EST						5.6e-06	3.18
Hs.308418	hypothetical protein FLJ20095	FLJ20095	55609	Xq26.1							0.000939	1.71					8.69e-05	2.3
Hs.3085	helicase with zinc finger domain	HELZ	9931	17q24.2					0.000782	-1.88679	0.000326	-1.92308
Hs.30909	limkain b1	LKAP	9665	16p13.13					0.000108	-2.85714	9.58e-05	-2.85714	7.95e-05	-2.94118
Hs.31034	peroxisomal biogenesis factor 11A	PEX11A	8800	15q25.3									0.000161	2.79
Hs.310536	ESTs				0.000357	4.16	2.15e-06	4.04			8.53e-05	3.7
Hs.310539	ESTs				0.000382	4.33	6.4e-05	3.63	3.39e-06	4.33	2.49e-07	4.14
Hs.31082	hypothetical protein FLJ10525	FLJ10525	55161	4p13			5.32e-06	4.24			0.000743	4.15
Hs.311002	Homo sapiens cDNA FLJ10705 fis, clone NT2RP3000850.												0.000391	-2.32558
Hs.312323	Homo sapiens cDNA FLJ37289 fis, clone BRAMY2014462.												0.000324	-6.66667
Hs.31297	duodenal cytochrome b	FLJ23462	79901	2q31.1			0.000306	-4.7619	0.000224	-3.84615	2.22e-05	-4
Hs.313247	hypothetical protein FLJ20487	FLJ20487	54949	11q12.2	0.000356	1.78			0.000453	1.63	0.000184	1.65
Hs.315562	ESTs						6.35e-06	3.83	1.76e-10	4.37	1.29e-09	4.13
Hs.318775	oxysterol binding protein-like 6	OSBPL6	114880	2q31-q32.1									0.000602	2.01
Hs.319467	glutamate receptor, ionotropic, AMPA 1	GRIA1	2890	5q31.1			9.06e-05	3.98
Hs.319825	hypothetical protein FLJ39885	FLJ39885	219285	7q21.2			0.000204	-1.66667
Hs.320368	ESTs												2.69e-05	2.79
Hs.321170	NBR2	NBR2	10230	17q21					0.000691	2.5	8.07e-05	2.43
Hs.32163	ESTs												0.000702	2.15
Hs.32168	autism susceptibility candidate 2	AUTS2	26053	7q11.21															0.000846	-10
Hs.322404	hypothetical protein MGC4175	MGC4175	79161	7q21.1-q21.2					0.000958	-1.85185
Hs.322851	Homo sapiens mRNA; cDNA DKFZp313P0917 (from clone DKFZp313P0917)												4.51e-05	-3.7037
Hs.323502	nuclear RNA export factor 1	NXF1	10482	11q12-q13									0.000453	-4			0.000761	-3.33333
Hs.32452	hypothetical protein DKFZp566D234	DKFZp566D234	56884	4q32.3			7.12e-07	4.47	0.000385	3.67	1.51e-05	3.81
Hs.32478	Homo sapiens, similar to RIKEN cDNA 1110018M03, clone MGC:24932 IMAGE:4938507, mRNA, complete cds								0.000775	2.93			0.000326	3.54
Hs.32501	ESTs				7.32e-05	5.38
Hs.325443	liver mitochondrial glutaminase	GA	27165	12q13									0.00098	4.43
Hs.325474	caldesmon 1	CALD1	800	7q33			0.000249	-6.66667
Hs.325960	membrane-spanning 4-domains, subfamily A, member 4	MS4A4A	51338	11q12									0.000178	4.77
Hs.326198	transcription factor 4	TCF4	6925	18q21.1													0.000547	-1.96078
Hs.32804	ESTs, Weakly similar to A43932 mucin 2 precursor, intestinal - human (fragments) [H.sapiens]				0.000216	3.92	3.86e-10	3.65	6.32e-05	3.13	3.35e-07	3.38
Hs.328450	EST, Weakly similar to PRPP_HUMAN SALIVARY PROLINE-RICH PROTEIN II-1 [H.sapiens]				6.69e-06	-3.33333	5.3e-06	-3.57143	1.23e-11	-3.33333	8.74e-13	-3.44828
Hs.329142	EST, Weakly similar to MEC2_HUMAN Methyl-CpG-binding protein 2 (MeCP-2 protein) (MeCP2) [H.sapiens]						0.000177	3.32
Hs.329183	EST																7.88e-05	-2.94118	0.000447	-2.5641
Hs.32951	solute carrier family 29 (nucleoside transporters), member 2	SLC29A2	3177	11q13			0.000616	2.37					0.000832	1.58
Hs.33020	hypothetical protein BC000919	LOC90736	90736	Xp11.22									0.000215	2.25
Hs.330994	RAB9A, member RAS oncogene family	RAB9A	9367	Xp22.2			0.000309	-1.6129
Hs.33191	similar to transmembrane receptor Unc5H1	KIAA1976	90249	5q35.3			6.68e-06	7.33	0.000201	5.64	3.47e-05	5.9
Hs.333300	myeloid/lymphoid or mixed-lineage leukemia 5 (trithorax homolog, Drosophila)	MLL5	55904	7q22.1			5.7e-05	3.25
Hs.333355	kinetochore associated 1	KNTC1	9735	12q24.31			0.000124	10.64	0.000268	7.63	7.78e-05	8.92
Hs.333513	small inducible cytokine subfamily E, member 1 (endothelial monocyte-activating)	SCYE1	9255	4q24													0.000309	-2.32558
Hs.333541	beta-amyloid binding protein precursor	BBP	83941	1p32.1											0.000292	-2
Hs.334	Rho guanine nucleotide exchange factor (GEF) 5	ARHGEF5	7984	7q33-q35									0.000502	2.42
Hs.334305	diacylglycerol O-acyltransferase homolog 2 (mouse)	DGAT2	84649	11q13.3			0.000318	4.27
Hs.334677	Homo sapiens, clone IMAGE:4829637, mRNA												0.000237	3.23
Hs.334826	splicing factor 3b, subunit 1, 155kDa	SF3B1	23451	2q33.1													0.000911	-2.5
Hs.334841	selenium binding protein 1	SELENBP1	8991	1q21-q22					0.000152	-4
Hs.33532	zinc finger protein 151 (pHZ-67)	ZNF151	7709	1p36.2-p36.1			3.48e-06	2.82									0.000256	-2.04082
Hs.335322	paraoxonase 3	PON3	5446	7q21.3			0.000206	-2.27273
Hs.33565	ESTs, Weakly similar to PRO0478 protein [Homo sapiens] [H.sapiens]						1.12e-06	6.24	0.000142	5.3	4.97e-06	5.69
Hs.335918	farnesyl diphosphate synthase (farnesyl pyrophosphate synthetase, dimethylallyltranstransferase, geranyltranstransferase)	FDPS	2224	1q21.3			0.000497	2.25
Hs.337078	NICE-5 protein	HSA243666	55585	1q21.3									0.000481	1.95
Hs.337340	hypothetical protein MGC21688	MGC21688	131408	3q27.3					0.000378	2.33	0.000276	2.19
Hs.337774	rho/rac guanine nucleotide exchange factor (GEF) 2	ARHGEF2	9181	1q21-q22									0.000681	2.24
Hs.339810	Human growth/differentiation factor 1 (GDF-1) mRNA, complete cds.								6.82e-05	2.53	2.17e-07	2.66
Hs.34074	dipeptidylpeptidase 6	DPP6	1804	7q36.2			5.05e-05	-2.94118	1.56e-05	-3.0303	3.68e-05	-2.85714
Hs.341806	hypothetical protein FLJ21069	FLJ21069	79745	2p23.2			0.000907	-2.43902	0.000334	-2	0.000217	-2.04082
Hs.343588	Homo sapiens, clone IMAGE:3604336, mRNA, partial cds												0.000193	3.23
Hs.343603	titin-cap (telethonin)	TCAP	8557	17q12									5.34e-05	2.74					0.000497	2.12
Hs.343807	RAD51 homolog (RecA homolog, E. coli) (S. cerevisiae)	RAD51	5888	15q15.1			0.000681	4.47	0.000227	5.86	0.000131	5
Hs.3446	mitogen-activated protein kinase kinase 1	MAP2K1	5604	15q22.1-q22.33			0.00093	-1.44928
Hs.34579	hypothetical protein FLJ10948	FLJ10948	55268	1p32.3					2.45e-06	-3.33333	5.24e-05	-2.94118
Hs.346947	hypothetical protein FLJ37464	FLJ37464	283848	16q21			7.12e-07	-33.3333	1.5e-06	-25	1.08e-06	-25					3.21e-05	-10	9.38e-07	-10
Hs.347353	nuclear receptor subfamily 1, group H, member 3	NR1H3	10062	11p11.12									8.79e-05	-2
Hs.347524	hypothetical protein MGC24665	MGC24665	116028	16p13.2	6.98e-05	5.52	0.00086	8.91	3.95e-06	7.82	2.01e-06	7.52
Hs.34780	doublecortex; lissencephaly, X-linked (doublecortin)	DCX	1641	Xq22.3-q23															0.000715	1.56
Hs.348024	v-ral simian leukemia viral oncogene homolog B (ras related; GTP binding protein)	RALB	5899	2cen-q13									0.000111	-2.94118
Hs.348601	glycerol-3-phosphate dehydrogenase 1 (soluble)	GPD1	2819	12q12-q13					0.000304	3.49	0.000837	3.19	0.000238	3.55
Hs.349122	ESTs, Weakly similar to hypothetical protein FLJ20378 [Homo sapiens] [H.sapiens]																0.000924	2.16
Hs.349470	synuclein, gamma (breast cancer-specific protein 1)	SNCG	6623	10q23.2-q23.3									0.000252	3.2
Hs.349499	desmoplakin (DPI, DPII)	DSP	1832	6p24													0.000187	-3.125	0.000432	-2.63158
Hs.350621	leiomodin 3 (fetal)	LMOD3	56203	3p14.1													0.000332	2.49
Hs.350795	KIAA1958 protein	KIAA1958	158405	9q32									6.68e-05	3.23
Hs.351088	cyclic AMP-regulated phosphoprotein, 21 kD	ARPP-21	10777	3p22.1									0.000156	3.21
Hs.351187	hypothetical protein LOC284208	LOC284208	284208	17q25.3					0.000404	2.2
Hs.351201	Homo sapiens, clone IMAGE:4106329, mRNA												4.31e-05	2.79			0.000197	2.64
Hs.351334	biphenyl hydrolase-like (serine hydrolase; breast epithelial mucin-associated antigen)	BPHL	670	6p25													0.00084	2.11
Hs.351350	Homo sapiens cDNA FLJ31758 fis, clone NT2RI2007589.				0.000679	3.65	4.91e-07	3.62			8.39e-05	3.67
Hs.352120	Human gamma-glutamyl transpeptidase mRNA, complete cds.								0.000824	-3.33333
Hs.352382	PI-3-kinase-related kinase SMG-1	SMG1	23049	16p13.12			1.3e-07	3.68	0.000201	4.87	0.00013	4.23
Hs.352398	Homo sapiens, clone MGC:24463 IMAGE:4082362, mRNA, complete cds												0.000536	2.96
Hs.355281	double C2-like domains, alpha	DOC2A	8448	16p12.1					0.000699	2.45	1.69e-05	2.54
Hs.355315	arginyltransferase 1	ATE1	11101	10q26.13			3.33e-05	2.74
Hs.355542	small proline-rich protein 2A	SPRR2A	6700	1q21-q22			1.17e-06	-7.69231	1.18e-05	-12.5	1.76e-06	-11.1111
Hs.355660	peptide-histidine transporter 4	PTR4	121260	12q24.32			0.000439	-2.22222
Hs.355779	Homo sapiens clone TCCCTA00211 mRNA sequence												0.000528	2.38
Hs.355816	conserved gene amplified in osteosarcoma	OS4	10106	12q13-q15					0.000487	-1.96078
Hs.355896	cell division cycle 2-like 2	CDC2L2	985	1p36.3					3.24e-05	2.58	7.36e-06	2.85
Hs.355930	stress-induced-phosphoprotein 1 (Hsp70/Hsp90-organizing protein)	STIP1	10963	11q13													3.01e-05	-9.09091	3.39e-05	-7.14286
Hs.356370	Kruppel-like factor 4 (gut)	KLF4	9314	9q31			4.88e-05	-6.25									1.76e-05	-7.69231	3.17e-06	-6.25
Hs.356395	ESTs, Highly similar to KIAA0187 gene product [Homo sapiens] [H.sapiens]								5.34e-06	2.6	4.54e-06	2.81
Hs.356624	nidogen (enactin)	NID	4811	1q43															0.000888	-5
Hs.356659	Homo sapiens cDNA FLJ34934 fis, clone NT2RP7005750.												0.000927	3.28
Hs.356786	Homo sapiens mRNA; cDNA DKFZp686D0521 (from clone DKFZp686D0521)																0.000777	-2.27273
Hs.356812	ESTs								0.000544	2.36
Hs.35804	hect domain and RLD 3	HERC3	8916	4q21			2.91e-06	-4.16667
Hs.35937	myogenic factor 6 (herculin)	MYF6	4618	12q21									1.99e-05	2.16
Hs.3628	mitogen-activated protein kinase kinase kinase kinase 4	MAP4K4	9448	2q11.2-q12									0.000214	-2.08333
Hs.36451	glutamate receptor, ionotropic, N-methyl D-aspartate 2C	GRIN2C	2905	17q25	0.000927	4.64	4.35e-06	4.33
Hs.367667	postmeiotic segregation increased 2-like 8	PMS2L8	5386	7q22	4.01e-05	-6.25	0.000325	-4.16667	1.4e-06	-5	7.23e-09	-5
Hs.367697	nucleoporin 50kDa	NUP50	10762	22q13.31			2.78e-05	3.17
Hs.36828	hypothetical protein MGC17347	MGC17347	116224	9q13									0.000244	3.28
Hs.369589	ESTs						3.94e-05	-3.84615
Hs.36972	CD7 antigen (p41)	CD7	924	17q25.2-q25.3	0.000392	3.92	0.000211	3.13
Hs.36977	hemoglobin, delta	HBD	3045	11p15.5			5.31e-08	-33.3333	9.08e-09	-25	9.4e-09	-25					2.01e-05	-7.14286	3.46e-07	-7.69231
Hs.37035	Homo sapiens clone HB9 mRNA sequence												0.000303	4.82
Hs.371794	ESTs																0.000851	2.4
Hs.372548	phosphoinositide-3-kinase, regulatory subunit, polypeptide 3 (p55, gamma)	PIK3R3	8503	1p33					0.000125	3.08
Hs.372651	hypothetical protein MGC29643	MGC29643	116372	2q21.1									0.000543	2.62
Hs.374409	endothelial PAS domain protein 1	EPAS1	2034	2p21-p16			0.000285	3.65
Hs.374491	proliferation-associated 2G4, 38kDa	PA2G4	5036	12q13			0.000117	2.37	0.000516	2.22
Hs.374536	isovaleryl Coenzyme A dehydrogenase	IVD	3712	15q14-q15			0.000493	3.85
Hs.374556	hypothetical protein MGC26885	MGC26885	124044	16q24.3	7.04e-07	7.31	3.44e-06	6.28	6.82e-05	5.81	1.49e-07	6.21
Hs.374584	ESTs, Moderately similar to A43542 lymphocyte-specific protein 1 - human [H.sapiens]												3.33e-05	1.72
Hs.374853	hypothetical brain protein my038	MY038	283886	16p12.2	0.000128	-2.63158			9.67e-07	-2.77778	3.75e-06	-2.5641
Hs.374987	KIAA0459 protein	KIAA0459	23252	1p36.13					0.000563	2.83	8.02e-05	2.93
Hs.375108	CD24 antigen (small cell lung carcinoma cluster 4 antigen)	CD24	934	6q21			0.000467	14.3	0.000859	10.66	0.000396	11.84
Hs.375193	kinesin family member 1B	KIF1B	23095	1p36.2									0.000815	1.67			0.000682	1.38
Hs.375614	hypothetical protein FLJ20015	FLJ20015	54459	17q25					0.000131	-1.92308	0.000258	-1.85185
Hs.376560	six transmembrane epithelial antigen of prostate 2	STEAP2	261729	7q21									0.000835	1.9
Hs.376772	Homo sapiens cDNA FLJ33192 fis, clone ADRGL2005756.												9.11e-05	2.48
Hs.378199	glutathione S-transferase A2	GSTA2	2939	6p12.1									3.5e-05	2.37
Hs.37860	Kruppel-like factor 1 (erythroid)	KLF1	10661	19p13.13-p13.12									0.00065	2.31
Hs.37953	Fanconi anemia, complementation group C	FANCC	2176	9q22.3			0.000718	3.02
Hs.379825	Homo sapiens, Similar to chondroitin sulfate proteoglycan 5 (neuroglycan C), clone IMAGE:5284162, mRNA								0.000102	3.84	0.00032	3.57
Hs.380045	Homo sapiens cDNA FLJ34528 fis, clone HLUNG2008066, weakly similar to LIM DOMAIN PROTEIN CLP-36.																0.000161	-3.33333	0.000304	-3.125
Hs.380120	ESTs								6.04e-05	2.89	8.52e-05	2.67
Hs.380359	solute carrier family 25 (mitochondrial carrier; Graves disease autoantigen), member 16	SLC25A16	8034	10q21.3									0.000578	3.26
Hs.380430	ATP-dependent RNA helicase	ROK1	11056	17q21.1									0.000708	2.64
Hs.380774	DEAD/H (Asp-Glu-Ala-Asp/His) box polypeptide 3	DDX3	1654	Xp11.3-p11.23													1.61e-05	-3.22581	0.000149	-2.94118
Hs.381046	Homo sapiens, clone IMAGE:5277380, mRNA												2.96e-06	2.54
Hs.381165	splicing factor, arginine/serine-rich 12	SFRS12	140890	5q12.3			0.000315	3.6
Hs.381218	cytochrome b5 outer mitochondrial membrane precursor	CYB5-M	80777	16q22.1													0.000301	-1.66667
Hs.381231	caspase 8, apoptosis-related cysteine protease	CASP8	841	2q33-q34									0.00099	-5.26316
Hs.3830	KIAA0893 protein	KIAA0893	22911	1p13.2									0.000867	3.24
Hs.3833	3'-phosphoadenosine 5'-phosphosulfate synthase 1	PAPSS1	9061	4q24													0.000327	-7.14286	0.000284	-5.26316
Hs.384606	Homo sapiens full length insert cDNA clone ZD43E11																0.000725	2.4
Hs.386655	hemoglobin, gamma G	HBG2	3048	11p15.5															0.000715	-2.7027
Hs.387400	hypothetical protein LOC253782	LOC253782	253782	2q31.1									0.00072	2.78
Hs.388018	EST						0.000353	-1.96078
Hs.388683	EST, Weakly similar to E29149 proline-rich protein - mouse [M.musculus]																0.000815	1.95
Hs.389122	EST, Weakly similar to protein phosphatase 1, regulatory subunit 10 [Homo sapiens] [H.sapiens]								0.000257	2.73	3.81e-06	2.86
Hs.389277	ADP-ribosylation factor related protein 1	ARFRP1	10139	20q13.3					0.000148	2.01	0.000425	1.87
Hs.389369	EST, Weakly similar to Y076_HUMAN Hypothetical protein KIAA0076 (HA0936) [H.sapiens]						3.05e-05	4.45
Hs.38991	S100 calcium binding protein A2	S100A2	6273	1q21									4e-05	2.09
Hs.397828	Homo sapiens mRNA; cDNA DKFZp434C2112 (from clone DKFZp434C2112)						0.000634	-7.14286	5.82e-05	-5.26316	0.000215	-5.26316
Hs.398212	Homo sapiens, Similar to putative selenocysteine lyase, clone IMAGE:3639245, mRNA												0.000938	2.57
Hs.3989	plexin B2	PLXNB2	23654	22q13.33			0.000936	-2.5641
Hs.39982	EST								0.000212	2.4
Hs.399966	Homo sapiens full length insert cDNA clone YY51E04												0.000384	2.72
Hs.4	alcohol dehydrogenase IB (class I), beta polypeptide	ADH1B	125	4q21-q23			0.000815	-6.66667
Hs.401448	tumor protein, translationally-controlled 1	TPT1	7178	13q12-q14			4.14e-05	-2.22222
Hs.40154	jumonji homolog (mouse)	JMJ	3720	6p24-p23			1.82e-06	10.65	3.56e-09	8.54	1.75e-08	8.64
Hs.401726	Homo sapiens cDNA FLJ33024 fis, clone THYMU1000532, moderately similar to HIGH-AFFINITY CAMP-SPECIFIC 3',5'-CYCLIC PHOSPHODIESTERASE (EC 3.1.4.17).												0.000375	-2.77778
Hs.401730	synaptojanin 1	SYNJ1	8867	21q22.2			0.000466	-1.78571			0.000672	-1.63934
Hs.401842	Homo sapiens full length insert cDNA YH77E09												0.000308	-1.92308
Hs.405669	ESTs						0.000229	4.58	0.00045	3.95	3.57e-05	4.4
Hs.405720	regulator of G-protein signalling 4	RGS4	5999	1q23.1			6.74e-05	-5.88235
Hs.405793	ESTs																0.000546	2.34
Hs.405798	ESTs												0.000679	2.18
Hs.405891	KIAA0515 protein	KIAA0515	23121	9q34.2									0.000143	-3.7037
Hs.405946	suppressor of cytokine signaling 2	SOCS2	8835	12q													0.000119	-3.7037	0.000559	-3.22581
Hs.406056	ESTs, Weakly similar to ribosomal protein L10a; 60S ribosomal protein L10a [Homo sapiens] [H.sapiens]																		0.000631	2.12
Hs.406099	calmin (calponin-like, transmembrane)	CLMN	79789	14q32.2					0.000304	1.84
Hs.406107	Human HepG2 partial cDNA, clone hmd3f07m5.														0.000818	-3.7037	0.000821	-4.16667	0.00052	-3.7037
Hs.406693	inactivation escape 1	INE1	8552	Xp11.4-p11.3													0.000493	2.39
Hs.406738	hypothetical protein FLJ20222	FLJ20222	220143	18q21.32			5.6e-08	4.05	5.92e-10	4.14	8.85e-11	3.99
Hs.40696	ESTs																0.000967	2.4
Hs.408	collagen, type IV, alpha 6	COL4A6	1288	Xq22			0.000777	-3.125
Hs.4082	lectin, galactoside-binding, soluble, 8 (galectin 8)	LGALS8	3964	1q42-q43	9.33e-05	-4.54545	0.000212	-3.7037	2.84e-05	-3.7037	5.94e-07	-3.84615
Hs.408393	peroxisomal acyl-CoA thioesterase	PTE1	10005				6.92e-07	4.89	0.000975	3.88	0.000102	3.99
Hs.4084	KIAA1025 protein	KIAA1025	23389	12q24.22			0.000112	-2.43902
Hs.409511	EST						0.000721	-1.6129			0.000311	-1.5873
Hs.409514	ESTs				0.000127	-1.96078	2.6e-06	-2.17391	9.81e-05	-2	1.21e-06	-2.04082
Hs.41	carcinoembryonic antigen-related cell adhesion molecule 8	CEACAM8	1088	19q13.2			7.29e-05	2.73
Hs.41072	serine (or cysteine) proteinase inhibitor, clade B (ovalbumin), member 6	SERPINB6	5269	6p25									0.000578	-3.7037			0.000916	-2.5641	0.000902	-2.43902
Hs.410941	ESTs								3.88e-05	2.46	9.98e-07	2.4
Hs.411875	EST, Weakly similar to sporulation-induced transcript 4-associated protein; hypothetical protein FLJ11058 [Homo sapiens] [H.sapiens]						0.000502	-3.0303	4.01e-05	-3.33333	0.000156	-3.44828
Hs.414368	EST																		0.000296	4.07
Hs.416184	EST						0.000796	3.46
Hs.41691	basic leucine zipper transcription factor, ATF-like	BATF	10538	14q24.3					1.31e-05	3.68	7.43e-08	3.61
Hs.41696	keratin, hair, acidic, 1	KRTHA1	3881	17q12-q21					0.000491	2.4	0.00019	2.33	0.000683	-1.85185
Hs.416994	POP7 (processing of precursor, S. cerevisiae) homolog	RPP20	10248	7q22					6.08e-05	3.06	1.18e-05	2.95
Hs.417091	Homo sapiens clone 23809 mRNA sequence				3.82e-05	6.53	0.0001	5.36			0.000224	4.98
Hs.417644	ESTs, Moderately similar to OM40_HUMAN Probable mitochondrial import receptor subunit TOM40 homolog (Translocase of outer membrane 40 kDa subunit homolog) (Haymaker protein) (p38.5) [H.sapiens]			14													0.000695	2.24
Hs.418	fibroblast activation protein, alpha	FAP	2191	2q23			3.45e-05	4.51
Hs.421194	tyrosylprotein sulfotransferase 1	TPST1	8460	7q11.21													0.000887	-3.0303
Hs.421845	ESTs																		0.00031	4.51
Hs.422873	ELK3, ETS-domain protein (SRF accessory protein 2)	ELK3	2004	12q23			0.000432	2.32
Hs.423	pancreatitis-associated protein	PAP	5068	2p12									5.86e-05	2.7
Hs.423336	hypothetical protein MGC13523	MGC13523	112611	6q14.3									0.000307	3.18
Hs.425293	ribosomal protein L10a	RPL10A	4736	6p21.3-p21.2															0.000254	-3.7037
Hs.425879	Homo sapiens, Similar to transcriptional activator of the c-fos promoter, clone IMAGE:4157438, mRNA												0.000668	1.4
Hs.427773	ESTs												0.000535	2.56
Hs.4283	Homo sapiens cDNA FLJ31125 fis, clone IMR322000819.												0.000828	2.26
Hs.4295	proteasome (prosome, macropain) 26S subunit, non-ATPase, 12	PSMD12	5718	17q24.2					0.000149	2.95	2.67e-05	2.71
Hs.429506	NADH dehydrogenase (ubiquinone) Fe-S protein 3, 30kDa (NADH-coenzyme Q reductase)	NDUFS3	4722	11p11.11			0.000154	2.09
Hs.42957	methyltransferase-like 1	METTL1	4234	12q13			1.55e-05	6.23	5.35e-09	5.43	8.47e-08	5.5
Hs.431813	ESTs				0.000884	2.07					0.000536	1.98
Hs.432091	EST, Moderately similar to ERC1_HUMAN DNA excision repair protein ERCC-1 [H.sapiens]												0.000249	2.73
Hs.432233	interferon, alpha-inducible protein (clone IFI-15K)	G1P2	9636	1p36.33													0.000339	2.56	0.000771	2.35
Hs.432483	RCD1 required for cell differentiation1 homolog (S. pombe)	RQCD1	9125	2q35									0.000249	2.34
Hs.432760	ESTs						0.000845	-1.44928
Hs.432840	phosphatidic acid phosphatase type 2B	PPAP2B	8613	1pter-p22.1					0.000611	4.39	0.000109	4.46	0.000389	-4
Hs.432858	ESTs												0.000913	3.13
Hs.432931	mannosidase, alpha, class 1A, member 1	MAN1A1	4121	6q22			0.000224	-3.44828
Hs.433143	Homo sapiens signal peptidase 25kDa subunit mRNA, 5' end of cds.			11															0.000947	-3.33333
Hs.433171	H.sapiens mRNA for an acute myeloid leukaemia protein (473bp)			21					0.000837	2.57
Hs.433213	methyltransferase like 2	METTL2	55798	7q32.2									0.000959	3.12
Hs.433230	splicing factor 3a, subunit 1, 120kDa	SF3A1	10291	22q12.2			0.000201	4.2	0.000814	3.37	0.000294	3.4
Hs.433387	CD99 antigen	CD99	4267	Xp22.32													0.000487	-3.84615
Hs.433452	KIAA1237 protein	KIAA1237	57493	3q21.2			0.000171	-4.16667			0.000496	-4
Hs.433668	Homo sapiens EST from clone 491476, full insert						0.000333	-1.88679									0.000547	-1.78571	0.000812	-1.69492
Hs.433714	v-Ki-ras2 Kirsten rat sarcoma 2 viral oncogene homolog	KRAS2	3845	12p12.1					7.72e-06	5.32	1.39e-06	4.87
Hs.434010	Homo sapiens, clone IMAGE:4797120, mRNA						0.000414	-1.96078
Hs.434726	Homo sapiens, clone IMAGE:5241870, mRNA				0.000685	-2.32558
Hs.434737	Homo sapiens, clone IMAGE:5272105, mRNA																0.000765	2.49
Hs.43481	dystrobrevin binding protein 1	DTNBP1	84062	6p22.3															0.000306	1.88
Hs.434944	ESTs																		0.00076	1.75
Hs.43505	inhibitor of kappa light polypeptide gene enhancer in B-cells, kinase gamma	IKBKG	8517	Xq28									0.000258	-2.85714
Hs.435469	ESTs						0.000103	2.97
Hs.435470	ESTs, Weakly similar to hypothetical protein FLJ13241 [Homo sapiens] [H.sapiens]								0.000154	6.3	0.000106	5.92					0.000124	2.18
Hs.43616	kelch-like 6 (Drosophila)	KLHL6	89857						0.00071	2.32
Hs.43628	deleted in lymphocytic leukemia, 2	DLEU2	8847	13q14.3									7.43e-05	2.88
Hs.43728	glutathione peroxidase 6	GPX6	27234	1p32					0.000559	3.07	0.000259	3.05
Hs.437528	EST								0.000116	-1.78571	7.39e-05	-1.69492
Hs.43761	Homo sapiens cDNA FLJ40955 fis, clone UTERU2011199.						0.000188	6.98			0.000652	5.88
Hs.437673	EST																0.000184	2.19	0.000703	2.12
Hs.43834	similar to Ovis aries Y chromosome repeat region OY11.1	5'OY11.1	140883	22q11.2									0.000454	1.98
Hs.438541	ESTs								0.000675	2.15	0.000215	2.06
Hs.438575	ESTs						0.000976	-2.43902
Hs.438580	EST												0.00093	-4.16667
Hs.438664	ESTs												0.000443	2.34
Hs.438819	ESTs				0.000119	4.07	3.44e-05	3.85
Hs.438875	ESTs								0.000652	2.55			0.000311	3.16
Hs.44512	ESTs, Weakly similar to hypothetical protein FLJ20489 [Homo sapiens] [H.sapiens]																0.000878	2.08
Hs.44553	unc-5 homolog B (C. elegans)	UNC5C	8633	4q21-q23									6.07e-06	-6.66667
Hs.44766	retinitis pigmentosa 2 (X-linked recessive)	RP2	6102	Xp11.4-p11.21									0.000149	2.06
Hs.457	fucosyltransferase 7 (alpha (1,3) fucosyltransferase)	FUT7	2529	9q34.3					3.64e-06	3.77	1.07e-07	3.66
Hs.460	activating transcription factor 3	ATF3	467	1q32.3									0.00099	-10			2.66e-05	-11.1111	3.63e-06	-9.09091
Hs.46752	nitric oxide synthase 1 (neuronal)	NOS1	4842	12q24.2-q24.31									0.000386	2.7
Hs.47061	unc-51-like kinase 1 (C. elegans)	ULK1	8408	12q24.3									0.000862	-2.94118			0.000484	-2.04082
Hs.47269	Homo sapiens LQK1 hypothetical protein long isoform (LQK1) mRNA, complete cds, alternatively spliced								0.000328	2.58
Hs.47367	fem-1 homolog c (C.elegans)	FEM1C	56929	5q22													0.000709	-2.12766
Hs.4747	dyskeratosis congenita 1, dyskerin	DKC1	1736	Xq28	0.000188	-2.32558					0.000264	-2
Hs.4749	Homo sapiens mRNA; cDNA DKFZp761E13121 (from clone DKFZp761E13121); partial cds						4.83e-05	8.47	0.000783	7.52	0.000219	7.43
Hs.47584	potassium voltage-gated channel, delayed-rectifier, subfamily S, member 3	KCNS3	3790	2p24			0.000338	10.03	3.95e-05	10.36	6.3e-05	9.17
Hs.47626	Ras-like without CAAX 2	RIT2	6014	18q12.3									0.000817	-5.26316
Hs.47995	ESTs						0.000787	-1.92308
Hs.4866	hypothetical protein MGC46523	MGC46523	284129	17q25.3									0.000186	2.36
Hs.48820	Homo sapiens, clone IMAGE:3456971, mRNA				3.22e-05	3.66	1.6e-05	3.52			0.000416	3.54
Hs.48855	hypothetical protein FLJ10468	FLJ10468	55143	1p34.2	0.000249	7.67	1.91e-06	5.74	4.33e-05	5.42	9.6e-07	5.91
Hs.48876	farnesyl-diphosphate farnesyltransferase 1	FDFT1	2222	8p23.1-p22													0.00047	-2.94118
Hs.48998	fibronectin leucine rich transmembrane protein 2	FLRT2	23768	14q24-q32			6.77e-05	-9.09091	6.21e-05	-14.2857	5.48e-05	-11.1111
Hs.49265	Homo sapiens, clone IMAGE:4690669, mRNA								2.6e-05	-9.09091	0.000221	-8.33333
Hs.4935	KIAA0176 protein	KIAA0176	23510	17q25.2	0.00026	-3.44828
Hs.49476	Homo sapiens cDNA FLJ12815 fis, clone NT2RP2002546.				0.000894	-2.5	8.72e-05	-3.125	0.000293	-2.7027	2.39e-05	-2.77778			0.000395	-5	1.15e-06	-6.25	4.87e-08	-5.26316
Hs.49760	origin recognition complex, subunit 6 homolog-like (yeast)	ORC6L	23594	16q12									0.000533	2
Hs.4983	Homo sapiens cDNA FLJ25935 fis, clone JTH06710.								0.000597	2.16	7.99e-05	2.28
Hs.5010	Homo sapiens clone 24672 mRNA sequence								0.000421	2.79			0.000956	3.08
Hs.50456	zinc finger protein 75a	ZNF75A	7627	16p13.11									0.000399	2.29
Hs.50579	hypothetical protein FLJ20718	FLJ20718	55027	16q11.2					0.000218	3.81
Hs.507	corneodesmosin	CDSN	1041	6p21.3															0.000528	1.71
Hs.50758	SMC4 structural maintenance of chromosomes 4-like 1 (yeast)	SMC4L1	10051	3q26.1			0.000752	8.78	6.52e-05	9.34	5.05e-05	8.28
Hs.50861	sirtuin (silent mating type information regulation 2 homolog) 4 (S. cerevisiae)	SIRT4	23409	12q			5.73e-07	3.74
Hs.50924	GATA binding protein 6	GATA6	2627	18q11.1-q11.2					0.000344	-4.54545
Hs.51	phosphatidylinositol glycan, class A (paroxysmal nocturnal hemoglobinuria)	PIGA	5277	Xp22.1															0.000228	-2.12766
Hs.51039	KIAA0076 gene product	KIAA0076	9820	6p21.1			8.01e-06	4.98	5.16e-07	4.36	7.65e-07	4.23
Hs.51743	KIAA1340 protein	KIAA1340	57542	12p11.23									0.000342	2.16	0.000179	1.53
Hs.51965	KIAA1209 protein	KIAA1209	57480	6q25.1					5.31e-05	-2.04082	0.000268	-1.96078
Hs.53155	properdin P factor, complement	PFC	5199	Xp11.3-p11.23									0.000143	4.87
Hs.5392	potassium channel modulatory factor	PCMF	56888	2p11.2					0.000303	2.02			0.000395	1.98
Hs.53973	vasoactive intestinal peptide	VIP	7432	6q26-q27									0.000705	2.53
Hs.54089	BRCA1 associated RING domain 1	BARD1	580	2q34-q35			1.67e-05	13.68	7.51e-09	9.84	6.8e-07	9.77
Hs.54460	chemokine (C-C motif) ligand 11	CCL11	6356	17q21.1-q21.2									4.84e-05	2.66
Hs.54470	ATP-binding cassette, sub-family C (CFTR/MRP), member 8	ABCC8	6833	11p15.1									5.69e-05	-6.25
Hs.54488	zinc finger protein 37a (KOX 21)	ZNF37A	7587	10p11.2			0.000907	-2.32558
Hs.54517	ficolin (collagen/fibrinogen domain containing lectin) 2 (hucolin)	FCN2	2220	9q34									1.31e-05	2.57					0.000432	2.04
Hs.5462	solute carrier family 4, sodium bicarbonate cotransporter, member 4	SLC4A4	8671	4q21			0.000873	-1.92308	5.64e-05	-1.92308	5.49e-07	-1.92308
Hs.54697	Cdc42 guanine nucleotide exchange factor (GEF) 9	ARHGEF9	23229	Xq11.1					5.64e-05	2.52	0.000105	2.55
Hs.54941	phosphorylase kinase, alpha 2 (liver)	PHKA2	5256	Xp22.2-p22.1									4.8e-05	-2.22222
Hs.55173	cadherin, EGF LAG seven-pass G-type receptor 3 (flamingo homolog, Drosophila)	CELSR3	1951	3p24.1-p21.2									0.000435	3.75
Hs.55424	ESTs								2.32e-05	3.11	0.000473	2.73
Hs.55481	zinc finger protein 165	ZNF165	7718	6p21.3													8.8e-05	-2.27273	2.27e-05	-2.27273
Hs.55601	host cell factor 2	HCF-2	29915	12q23.3									0.000885	1.74
Hs.55781	hypothetical protein FLJ20604	FLJ20604	54995	3p24.1			0.000924	3.29	0.000196	2.98	6.41e-06	3.08
Hs.55947	pecanex homolog (Drosophila)	PCNX	22990	14q24.1			0.000196	-1.31579
Hs.56045	src homology three (SH3) and cysteine rich domain	STAC	6769	3p22.3									0.000444	3
Hs.56336	protein kinase, Y-linked	PRKY	5616	Yp11.2															0.000968	-2.7027
Hs.56407	phosphoserine phosphatase	PSPH	5723	7p15.2-p15.1									7.24e-05	2.29
Hs.56828	trinucleotide repeat containing 5	TNRC5	10695	6pter-p12.1									0.000475	-1.69492
Hs.57771	kallikrein 11	KLK11	11012	19q13.3-q13.4	0.000284	-7.69231
Hs.57813	zinc ribbon domain containing, 1	ZNRD1	30834	6p21.3									0.000818	-2.38095
Hs.57856	PFTAIRE protein kinase 1	PFTK1	5218	7q21-q22													0.00024	1.77	4.53e-05	1.69
Hs.58043	adenylate cyclase 4	ADCY4	196883	14q11.2									0.000429	4.05
Hs.58169	highly expressed in cancer, rich in leucine heptad repeats	HEC	10403	18p11.31			3.75e-06	8.48	1.84e-07	7.6	1.12e-07	7.48
Hs.58608	hypothetical protein LOC90321	LOC90321	90321	19q13.41									0.000213	3.28
Hs.59498	cell division cycle 2-like 5 (cholinesterase-related cell division controller)	CDC2L5	8621	7p13					0.000815	1.93	0.000831	1.82
Hs.60103	KIAA0690 protein	KIAA0690	23223	10q24.1									0.000738	2.46
Hs.60440	serine protease HTRA3	HTRA3	94031	4p16.1	0.000236	5.76	2.56e-06	5.54	0.000342	4.58	6.55e-06	5.03
Hs.6151	pumilio homolog 2 (Drosophila)	PUM2	23369	2p22-p21													8.85e-05	-1.92308	7.29e-05	-1.92308
Hs.621	lectin, galactoside-binding, soluble, 3 (galectin 3)	LGALS3	3958	14q21-q22			0.0008	-3.84615
Hs.6211	methyl-CpG binding domain protein 1	MBD1	4152	18q21	0.000734	-1.6129
Hs.62192	coagulation factor III (thromboplastin, tissue factor)	F3	2152	1p22-p21													1.5e-05	-11.1111	1.76e-05	-8.33333
Hs.622	v-raf murine sarcoma viral oncogene homolog B1	BRAF	673	7q34					0.000199	2.59
Hs.6224	KIAA0895 protein	KIAA0895	23366	7p14.1									0.000489	1.89
Hs.62275	CGI-141 protein	CGI-141	51026	12p12.1													0.000269	-1.5625
Hs.6241	phosphoinositide-3-kinase, regulatory subunit, polypeptide 1 (p85 alpha)	PIK3R1	5295	5q12-q13													0.000799	-3.44828
Hs.62604	hypothetical protein FLJ25348	FLJ25348	90853	1p34.3									0.000609	2.3
Hs.62767	KIAA1332 protein	KIAA1332	54455	1p36.23-p36.11					0.000743	2.73			0.000188	3.46
Hs.62771	hypothetical protein FLJ20186	FLJ20186	54849	16q24.3	6.07e-06	4.37			9.26e-05	3.92	1.23e-05	3.79
Hs.6283	glutamate receptor, ionotropic, N-methyl D-aspartate-like 1A	GRINL1A	81488	15q22.1			2.46e-05	-2.77778			0.000267	-2.5641
Hs.63187	ESTs, Weakly similar to neuronal thread protein [Homo sapiens] [H.sapiens]																		0.000867	3.12
Hs.63302	myotubularin related protein 3	MTMR3	8897	22q12.2													8.32e-05	-2.32558	0.000142	-2.32558
Hs.6335	phosphatidylinositol-4-phosphate 5-kinase, type II, beta	PIP5K2B	8396	17q21.1					0.000607	-2.04082
Hs.6336	KIAA0672 gene product	KIAA0672	9912	17p12			1.4e-05	-2.38095	0.000199	-2.38095	9.19e-05	-2.32558
Hs.64016	protein S (alpha)	PROS1	5627	3p11-q11.2					0.000565	-8.33333	0.000871	-8.33333
Hs.64025	basonuclin	BNC	646	15q25.1			0.000762	-11.1111	5.46e-05	-10	6.16e-06	-11.1111
Hs.64056	p21/Cdc42/Rac1-activated kinase 1 (STE20 homolog, yeast)	PAK1	5058	11q13-q14	7.89e-05	3.81	0.000118	6.28	6.51e-07	5.65	3.9e-07	5.39
Hs.6414	nucleolar protein 4	NOL4	8715	18q12			3.2e-05	4.2
Hs.6421	hypothetical protein DKFZp761N09121	DKFZP761N09121	57183	7									0.000431	2.75
Hs.64310	interleukin 11 receptor, alpha	IL11RA	3590	9p13									0.000293	-2.5641
Hs.65029	growth arrest-specific 1	GAS1	2619	9q21.3-q22			0.00048	-9.09091	2.31e-05	-6.66667	9.3e-05	-7.69231
Hs.6517	amiloride-sensitive cation channel 1, neuronal (degenerin)	ACCN1	40	17q11.2-q12									6.25e-05	1.97
Hs.6527	G protein-coupled receptor 56	GPR56	9289	16q13									0.00031	1.65
Hs.6564	breast cancer anti-estrogen resistance 3	BCAR3	8412	1p22.1			2.26e-05	-4			0.000173	-3.125
Hs.65756	regulator of G-protein signalling 11	RGS11	8786	16p13.3									0.000234	2.51
Hs.65993	CDC14 cell division cycle 14 homolog A (S. cerevisiae)	CDC14A	8556	1p21					2e-05	-3.125	0.000758	-3.0303
Hs.66	interleukin 1 receptor-like 1	IL1RL1	9173	2q12					0.000368	2.32
Hs.66141	prostate derived STE20-like kinase PSK	PSK	51677	16p12.1			0.000435	-2.08333
Hs.66185	Homo Sapiens mRNA,trapped exon e1b7, DCR1-16.0,						6.07e-06	4.19
Hs.663	cystic fibrosis transmembrane conductance regulator, ATP-binding cassette (sub-family C, member 7)	CFTR	1080	7q31.2									0.000641	-14.2857
Hs.66708	vesicle-associated membrane protein 3 (cellubrevin)	VAMP3	9341	1p36.22									6.77e-05	-4.54545			0.000399	-3.57143	0.000222	-3.22581
Hs.6838	ras homolog gene family, member E	ARHE	390	2q23.3													6.91e-05	-4.16667	4.24e-05	-3.84615
Hs.68398	period homolog 1 (Drosophila)	PER1	5187	17p13.1-17p12													6.12e-05	-2.43902	7.14e-06	-2.38095
Hs.6853	hypothetical protein FLJ22167	FLJ22167	79583	16q22.3													0.000216	-2.08333	5.4e-05	-2.12766
Hs.687	cytochrome P450, family 4, subfamily B, polypeptide 1	CYP4B1	1580	1p34-p12									0.000168	1.97
Hs.68879	bone morphogenetic protein 4	BMP4	652	14q22-q23					0.000189	-2.32558
Hs.69049	tocopherol (alpha) transfer protein (ataxia (Friedreich-like) with vitamin E deficiency)	TTPA	7274	8q13.1-q13.3													0.000829	2.23
Hs.69192	vacuolar protein sorting 29 (yeast)	VPS29	51699	12q24													0.000285	-1.75439
Hs.69330	retinoblastoma binding protein 9	RBBP9	10741	20p11.2													0.000417	-1.42857
Hs.69360	kinesin family member 2C	KIF2C	11004	1p34.1			1.33e-05	6.18	1.52e-06	4.96	3.63e-08	5.01
Hs.69594	high-mobility group 20A	HMG20A	10363	15q24									0.00075	1.82
Hs.69997	zinc finger protein 238	ZNF238	10472	1q44-qter													0.000411	-6.25	0.000718	-5
Hs.7019	signal-induced proliferation-associated gene 1	SIPA1	6494	11q13					0.000645	2.55
Hs.70202	WD repeat domain 10	WDR10	55764	3q21									0.000812	1.81
Hs.70266	yeast Sec31p homolog	KIAA0905	22872	4q21.3													7.13e-05	-1.88679
Hs.7057	Homo sapiens cDNA FLJ31636 fis, clone NT2RI2003481.												0.000403	2.72			4.33e-05	2.44
Hs.70604	hypothetical protein LOC283904	LOC283904	283904	16q24.1									0.000532	-4
Hs.70725	gamma-aminobutyric acid (GABA) A receptor, pi	GABRP	2568	5q33-q34											0.000538	-11.1111	9.4e-10	-16.6667	1.77e-09	-14.2857
Hs.70823	sulfatase 1	SULF1	23213	8q13.1			0.000545	-5.26316
Hs.70937	histone 1, H3h	HIST1H3H	8357	6p22-p21.3					0.000126	2.71	0.000594	2.46
Hs.711	defensin, alpha 6, Paneth cell-specific	DEFA6	1671	8pter-p21			0.000163	2.79	4.63e-05	2.82	1.17e-05	2.8
Hs.71252	vasculin	DKFZp761C169	65056	5q11.2													0.000341	-4.54545	0.000699	-3.84615
Hs.71475	acid cluster protein 33	ACP33	51324	15q21-q22			4.03e-05	1.99
Hs.71574	tigger transposable element derived 5	TIGD5	84948	8q24.3			0.000797	1.95
Hs.7158	DKFZP566H073 protein	DKFZP566H073	26001	17p13.3									5.75e-05	-2.22222
Hs.71730	similar to crossveinless	LOC168667	168667	7p14.2	0.000328	4.48	2.69e-06	3.1
Hs.7179	RAD1 homolog (S. pombe)	RAD1	5810	5p13.2					0.000985	1.79
Hs.71791	yippee-like 1 (Drosophila)	YPEL1	29799										0.000126	1.46
Hs.7200	NIMA (never in mitosis gene a)- related kinase 9	NEK9	91754	14q24.2			0.000204	-2.32558	0.000909	-2.27273	0.000459	-2.22222
Hs.72050	non-metastatic cells 5, protein expressed in (nucleoside-diphosphate kinase)	NME5	8382	5q31									9.84e-06	-11.1111
Hs.72290	wingless-type MMTV integration site family, member 7A	WNT7A	7476	3p25			0.000223	6.38	1.56e-05	6.67	2.73e-06	6.58
Hs.7243	ubiquitin specific protease 24	USP24	23358	1p32.2			0.000577	3.36
Hs.7274	DKFZP434P1750 protein	DKFZP434P1750	26000	16p11.2					0.000339	1.83
Hs.72782	hypothetical protein FLJ11171	FLJ11171	55783	16q22.1									0.000285	2.02
Hs.728	ribonuclease, RNase A family, 2 (liver, eosinophil-derived neurotoxin)	RNASE2	6036	14q24-q31									0.000202	3.78
Hs.72918	chemokine (C-C motif) ligand 1	CCL1	6346	17q11.2					0.000244	2.41
Hs.72988	signal transducer and activator of transcription 2, 113kDa	STAT2	6773	12q13.13			0.000255	3.06
Hs.7306	secreted frizzled-related protein 1	SFRP1	6422	8p12-p11.1	0.000667	-6.25			0.00073	-6.66667	8.28e-05	-7.14286
Hs.73239	hypothetical protein FLJ10901	FLJ10901	55765	1q31.3			8.94e-08	18.37	0.000406	14.1	2.06e-05	15.1
Hs.7327	claudin 1	CLDN1	9076	3q28-q29			2.52e-06	-6.25	2.53e-05	-4.34783	1.08e-06	-4.7619
Hs.7331	asparaginase like 1	ASRGL1	80150	11q12.2													0.000787	-5.26316	6.19e-05	-5
Hs.7358	hypothetical protein FLJ13110	FLJ13110	65055	2p11.2					0.000512	-2.27273
Hs.73769	folate receptor 1 (adult)	FOLR1	2348	11q13.3-q14.1					0.000696	14.35
Hs.73792	complement component (3d/Epstein Barr virus) receptor 2	CR2	1380	1q32			0.000938	2.96
Hs.73797	guanine nucleotide binding protein (G protein), alpha 15 (Gq class)	GNA15	2769	19p13.3			0.000221	3.86	6.64e-07	4	8.58e-10	4.02
Hs.73826	protein tyrosine phosphatase, non-receptor type 4 (megakaryocyte)	PTPN4	5775	2q14.1									0.000776	2.75
Hs.73986	CDC-like kinase 2	CLK2	1196	1q21															0.000807	-4.54545
Hs.73987	CDC-like kinase 3	CLK3	1198	15q24									0.00087	-2.12766
Hs.73999	thyroid hormone receptor interactor 10	TRIP10	9322	19p13.3									0.000634	-1.78571
Hs.74002	nuclear receptor coactivator 1	NCOA1	8648	2p23			9.27e-05	-1.92308	0.000193	-1.81818	3.07e-05	-1.81818
Hs.74034	caveolin 1, caveolae protein, 22kDa	CAV1	857	7q31.1			7.31e-09	-8.33333	0.000845	-4.7619	6.51e-05	-5.88235					0.000194	-3.84615	5.06e-05	-3.44828
Hs.74131	arylsulfatase E (chondrodysplasia punctata 1)	ARSE	415	Xp22.3			8.96e-05	2.88	0.000144	2.88
Hs.74362	ClpP caseinolytic protease, ATP-dependent, proteolytic subunit homolog (E. coli)	CLPP	8192	19p13.3									0.00038	7.87	0.000522	8.04	9.97e-06	10.07	1.6e-08	9.11
Hs.7444	ESTs						0.000884	-2.38095
Hs.74441	chromodomain helicase DNA binding protein 4	CHD4	1108	12p13									0.000748	-1.72414
Hs.7446	chromosome 6 open reading frame 4	C6orf4	10758	6q21									0.000121	-2.27273			0.000956	-1.88679
Hs.74466	carcinoembryonic antigen-related cell adhesion molecule 7	CEACAM7	1087	19q13.2					0.000965	2.56
Hs.74515	aryl hydrocarbon receptor nuclear translocator-like	ARNTL	406	11p15			2.25e-05	-2.27273
Hs.74583	sparc/osteonectin, cwcv and kazal-like domains proteoglycan (testican) 2	SPOCK2	9806	10pter-q25.3	0.000217	-12.5
Hs.74615	platelet-derived growth factor receptor, alpha polypeptide	PDGFRA	5156	4q11-q13											0.000695	-5.55556	1.63e-06	-7.69231	3.74e-07	-6.66667
Hs.74621	prion protein (p27-30) (Creutzfeld-Jakob disease, Gerstmann-Strausler-Scheinker syndrome, fatal familial insomnia)	PRNP	5621	20pter-p12			9.26e-05	-4.54545
Hs.75061	MARCKS-like protein	MLP	65108	1p34.3									0.000728	-3.7037
Hs.75074	mitogen-activated protein kinase-activated protein kinase 2	MAPKAPK2	9261	1q32			0.000959	3.47
Hs.75108	ribonuclease/angiogenin inhibitor	RNH	6050	11p15.5			3.42e-05	-3.57143	6.75e-05	-2.94118	0.000115	-3.0303	1.68e-05	-2.94118
Hs.75187	translocase of outer mitochondrial membrane 20 (yeast) homolog	TOMM20-PENDING	9804	1q42									0.000332	-4.7619
Hs.75188	WEE1 homolog (S. pombe)	WEE1	7465	11p15.3-p15.1													2.73e-05	-4.34783	3.7e-05	-3.84615
Hs.75193	COP9 homolog	COP9	10920	2q37.3													0.000764	-1.85185
Hs.75227	NADH dehydrogenase (ubiquinone) 1 alpha subcomplex, 9, 39kDa	NDUFA9	4704	12p13.3					0.000255	2.04
Hs.75231	solute carrier family 16 (monocarboxylic acid transporters), member 1	SLC16A1	6566	1p12	0.000626	-4.7619			1.52e-05	-3.57143	0.000119	-3.57143
Hs.75256	regulator of G-protein signalling 1	RGS1	5996	1q31					0.000753	4.62
Hs.75262	cathepsin O	CTSO	1519	4q31-q32	0.000288	-2.85714	0.000219	-4.7619
Hs.75275	ubiquitination factor E4A (UFD2 homolog, yeast)	UBE4A	9354	11q23.3									0.000522	4.35
Hs.75294	corticotropin releasing hormone	CRH	1392	8q13									0.000413	3.21
Hs.75307	transglutaminase 2 (C polypeptide, protein-glutamine-gamma-glutamyltransferase)	TGM2		20q12					0.00022	-2.22222	4.18e-05	-2.27273
Hs.75309	eukaryotic translation elongation factor 2	EEF2	1938	19pter-q12													0.000853	-2.5641
Hs.75353	inositol polyphosphate-5-phosphatase, 72kDa	INPP5E	23203	9q34.3													0.000256	-1.63934
Hs.75360	carboxypeptidase E	CPE	1363	4q32.3			0.000103	-11.1111	0.0008	-5.55556	0.000195	-7.69231
Hs.75393	acid phosphatase 1, soluble	ACP1	52	2p25													0.000786	-2.22222
Hs.75424	inhibitor of DNA binding 1, dominant negative helix-loop-helix protein	ID1	3397	20q11									0.000151	-11.1111	0.000223	-5	0.000309	-8.33333	5.96e-05	-7.14286
Hs.75428	superoxide dismutase 1, soluble (amyotrophic lateral sclerosis 1 (adult))	SOD1	6647	21q22.11									0.000124	1.98
Hs.75441	hydroxysteroid (17-beta) dehydrogenase 4	HSD17B4	3295	5q21													7.19e-05	-2.32558
Hs.75450	delta sleep inducing peptide, immunoreactor	DSIPI	1831	Xq22.3													0.000168	-1.75439	0.000147	-1.75439
Hs.75462	BTG family, member 2	BTG2	7832	1q32									0.000205	-14.2857			8.44e-05	-8.33333	5.15e-05	-7.69231
Hs.75485	ornithine aminotransferase (gyrate atrophy)	OAT	4942	10q26			0.00094	-4.34783
Hs.75486	heat shock transcription factor 4	HSF4	3299	16q21	8.17e-05	-3.125			0.000668	-3.22581	0.000113	-3.33333
Hs.75511	connective tissue growth factor	CTGF	1490	6q23.1															0.000428	-9.09091
Hs.75514	nucleoside phosphorylase	NP	4860	14q13.1					0.000139	4.27
Hs.75572	carboxypeptidase B2 (plasma, carboxypeptidase U)	CPB2	1361	13q14.11									0.000212	2.92
Hs.75573	centromere protein E, 312kDa	CENPE	1062	4q24-q25	9.33e-05	3.15	1.44e-06	2.9			0.000148	2.76
Hs.75586	cyclin D2	CCND2	894	12p13					0.000306	-5
Hs.75615	apolipoprotein C-II	APOC2	344	19q13.2			0.000451	3.37
Hs.75619	hyaluronoglucosaminidase 1	HYAL1	3373	3p21.3-p21.2									0.000241	4.11
Hs.75636	likely ortholog of mouse myosin light chain, regulatory A	MYLC2A	58498	7p21-p11.2			0.000823	3.19	0.000426	3.21	0.000177	3.28
Hs.75678	FBJ murine osteosarcoma viral oncogene homolog B	FOSB	2354	19q13.32													5.53e-05	-16.6667	9.55e-06	-14.2857
Hs.75703	chemokine (C-C motif) ligand 4	CCL4	6351	17q12					0.000695	2.71
Hs.75736	apolipoprotein D	APOD	347	3q26.2-qter													2e-06	-3.44828
Hs.75794	endothelial differentiation, lysophosphatidic acid G-protein-coupled receptor, 2	EDG2	1902	9q32															0.000707	-2.17391
Hs.75798	chromosome 20 open reading frame 111	C20orf111	51526	20q13.11			9.9e-06	4.49	8.09e-05	3.86	3.23e-05	3.93
Hs.758	RAS p21 protein activator (GTPase activating protein) 1	RASA1	5921	5q13.3									7.87e-05	-2.77778	0.000133	-2.38095	9.76e-05	-2.77778	5.73e-06	-2.5641
Hs.75811	N-acylsphingosine amidohydrolase (acid ceramidase) 1	ASAH1	427	8p22-p21.3													6.31e-05	-3.57143	0.000156	-3.125
Hs.75824	KIAA0174 gene product	KIAA0174	9798	16q22.1													0.000169	-3.33333
Hs.75850	WAS protein family, member 1	WASF1	8936	6q21-q22									0.000422	1.8
Hs.75873	zyxin	ZYX	7791	7q32									0.00068	-3.84615			0.000301	-3.125	0.00032	-2.77778
Hs.75893	ankyrin 3, node of Ranvier (ankyrin G)	ANK3	288	10q21			7.96e-05	-1.78571	0.000231	-1.63934	0.000147	-1.69492
Hs.75909	KIAA0182 protein	KIAA0182	23199	16q24.1									0.000303	-2.85714
Hs.75912	likely ortholog of mouse Rw1	RW1	23505	2q11.1															0.000353	-2.63158
Hs.76095	immediate early response 3	IER3	8870	6p21.3													0.000289	-4	0.000584	-3.33333
Hs.76206	cadherin 5, type 2, VE-cadherin (vascular epithelium)	CDH5	1003	16q22.1													0.000923	1.78
Hs.76224	EGF-containing fibulin-like extracellular matrix protein 1	EFEMP1	2202	2p16			2.39e-05	-33.3333	0.000143	-20	4.75e-05	-20
Hs.76228	amplified in osteosarcoma	OS-9	10956	12q13									9.85e-05	-3.57143
Hs.76239	aurora-A kinase interacting protein	AKIP	54998	1p36.33					0.000364	3.73	0.00026	3.55
Hs.76293	thymosin, beta 10	TMSB10	9168	2p11.2					3.01e-05	2.3
Hs.76353	serine (or cysteine) proteinase inhibitor, clade A (alpha-1 antiproteinase, antitrypsin), member 5	SERPINA5	5104	14q32.1													0.000892	-5.26316	0.000202	-4.7619
Hs.76392	aldehyde dehydrogenase 1 family, member A1	ALDH1A1	216	9q21.13											0.000718	-6.25
Hs.76422	phospholipase A2, group IIA (platelets, synovial fluid)	PLA2G2A	5320	1p35			9.52e-05	-11.1111
Hs.7647	MYC-associated zinc finger protein (purine-binding transcription factor)	MAZ	4150	16p11.2			0.000638	1.93
Hs.76473	insulin-like growth factor 2 receptor	IGF2R	3482	6q26									0.000782	-11.1111
Hs.76480	ubiquitin-like 4	UBL4	8266	Xq28									7.75e-05	3.07
Hs.76828	glypican 5	GPC5	2262	13q32			4.25e-05	3.53
Hs.76930	synuclein, alpha (non A4 component of amyloid precursor)	SNCA	6622	4q21			0.000812	-3.7037	0.000445	-5
Hs.77039	ribosomal protein S3A	RPS3A	6189	4q31.2-q31.3											0.000862	-3.7037			0.00033	-3.84615
Hs.77062	leukocyte immunoglobulin-like receptor, subfamily B (with TM and ITIM domains), member 5	LILRB5	10990	19q13.4											0.000675	-3.44828
Hs.77171	MCM5 minichromosome maintenance deficient 5, cell division cycle 46 (S. cerevisiae)	MCM5	4174	22q13.1			0.000473	1.74
Hs.77204	centromere protein F, 350/400ka (mitosin)	CENPF	1063	1q32-q41			0.000241	7.82
Hs.77254	chromobox homolog 1 (HP1 beta homolog Drosophila )	CBX1	10951	17q									8.16e-05	-5.88235
Hs.77256	enhancer of zeste homolog 2 (Drosophila)	EZH2	2146	7q35-q36	0.000782	3.26	0.000167	5.37	1.81e-05	4.45	1.42e-06	4.38
Hs.77257	cytoplasmic FMR1 interacting protein 1	CYFIP1	23191	15q11													0.000232	-2.22222
Hs.77271	protein kinase, cAMP-dependent, catalytic, alpha	PRKACA	5566	19p13.1			0.000517	2.9
Hs.7739	hypothetical protein MGC12904	MGC12904	81932	9q32					0.000299	2.54
Hs.77515	inositol 1,4,5-triphosphate receptor, type 3	ITPR3	3710	6p21													0.000667	1.8
Hs.77573	uridine phosphorylase	UP	7378	7			1.17e-06	3.41	1.21e-08	4.03	4.45e-08	3.86
Hs.778	guanylate cyclase activator 2A (guanylin)	GUCA2A	2980	1p35-p34									0.000337	-1.69492
Hs.77810	nuclear factor of activated T-cells, cytoplasmic, calcineurin-dependent 4	NFATC4	4776	14q11.2	0.000113	5.41	4.14e-06	4.57	8.42e-08	4.87	8.22e-10	4.87
Hs.77840	annexin A4	ANXA4	307	2p13													9.42e-05	-5.26316
Hs.77858	mesenchyme homeo box 2 (growth arrest-specific homeo box)	MEOX2	4223	7p22.1-p21.3											0.000935	1.52
Hs.77965	peptidyl-prolyl isomerase G (cyclophilin G)	PPIG	9360	2q31.1			0.000368	5.04	2.11e-05	4.79	7.91e-05	4.39
Hs.78089	ATPase, H+ transporting, lysosomal 14kDa, V1 subunit F	ATP6V1F	9296	7q32			0.00085	2.65	0.000213	2.52	0.000695	2.32
Hs.78106	phosphodiesterase 8B	PDE8B	8622	5q13.2			0.000682	-6.25	9.75e-05	-6.66667	2.59e-05	-6.25
Hs.78146	platelet/endothelial cell adhesion molecule (CD31 antigen)	PECAM1	5175	17q23									0.000905	1.68
Hs.78225	annexin A1	ANXA1	301	9q12-q21.2			0.00016	-5
Hs.78335	microtubule-associated protein, RP/EB family, member 2	MAPRE2	10982	18q12.1			0.000862	-2.12766	0.000763	-2.12766
Hs.78457	solute carrier family 25 (mitochondrial carrier; ornithine transporter) member 15	SLC25A15	10166	13q14									0.000781	3.27
Hs.785	integrin, alpha 2b (platelet glycoprotein IIb of IIb/IIIa complex, antigen CD41B)	ITGA2B	3674	17q21.32									6.99e-05	2.78
Hs.78619	gamma-glutamyl hydrolase (conjugase, folylpolygammaglutamyl hydrolase)	GGH	8836	8q12.1															0.00062	-1.88679
Hs.7879	interferon-related developmental regulator 1	IFRD1	3475	7q22-q31															0.000585	-2.12766
Hs.78846	heat shock 27kDa protein 2	HSPB2	3316	11q22-q23			0.000621	3.18			0.000317	2.93
Hs.78864	Fc fragment of IgG, low affinity IIa, receptor for (CD32)	FCGR2A	2212	1q23													0.000975	1.65
Hs.78893	PHD finger protein 3	PHF3	23469										0.000252	-3.125
Hs.78909	zinc finger protein 36, C3H type-like 2	ZFP36L2	678	2p22.3-p21															0.000607	-2.12766
Hs.78989	alcohol dehydrogenase 5 (class III), chi polypeptide	ADH5	128	4q21-q25					0.000455	-2.5	0.000921	-2.5641
Hs.79107	mitogen-activated protein kinase 14	MAPK14	1432	6p21.3-p21.2									0.000351	2.56
Hs.7911	KIAA0323 protein	KIAA0323	23351	14q11.2											0.000976	-1.81818
Hs.79217	pyrroline-5-carboxylate reductase 1	PYCR1	5831	17q25.3					0.000658	3.77	0.000144	3.72
Hs.79299	lipoma HMGIC fusion partner-like 2	LHFPL2	10184	5q13.3									0.000846	-2.38095
Hs.79307	Rac/Cdc42 guanine nucleotide exchange factor (GEF) 6	ARHGEF6	9459	Xq26									0.000894	1.5
Hs.79348	regulator of G-protein signalling 7	RGS7	6000	1q43									0.000479	3.07
Hs.79389	NEL-like 2 (chicken)	NELL2	4753	12q13.11-q13.12	0.000479	-33.3333			2.54e-05	-20	0.000159	-20
Hs.79393	tuberous sclerosis 1	TSC1	7248	9q34			0.000118	-2.5641	0.000488	-3.33333	0.000212	-3.0303	0.000174	-2.7027
Hs.79440	IGF-II mRNA-binding protein 3	KOC1	10643	7p11													0.000914	6.58
Hs.79672	KIAA0652 gene product	KIAA0652	9776	11p11.12									0.00042	2.84
Hs.79706	plectin 1, intermediate filament binding protein 500kDa	PLEC1	5339	8q24									7.63e-06	2.5
Hs.79748	solute carrier family 3 (activators of dibasic and neutral amino acid transport), member 2	SLC3A2	6520	11q13									0.000601	-2.94118
Hs.79933	cyclin I	CCNI	10983	4q21.21									0.000707	-3.57143			0.000376	-2.94118	0.000427	-2.85714
Hs.8004	huntingtin-associated protein interacting protein (duo)	HAPIP	8997	3q21.1			5.08e-07	3.7
Hs.80247	cholecystokinin	CCK	885	3p22-p21.3									0.000187	1.73
Hs.80261	enhancer of filamentation 1	HEF1	10543	6p25-p24							0.000557	4.78					1.13e-08	-4.16667	4.14e-09	-4.16667
Hs.80667	RALBP1 associated Eps domain containing 2	REPS2	9185	Xp22.22									0.000949	1.9
Hs.8071	synaptic vesicle glycoprotein 2B	SV2B	9899	15q26.1			0.000211	3.84			0.000386	3.54	0.000143	2.27
Hs.8087	NAG-5 protein	LOC51754	51754	9p13.1			1.14e-05	-2	2.8e-06	-2.27273	1.48e-06	-2.17391
Hs.80876	flavin containing monooxygenase 3	FMO3	2328	1q23-q25									0.000115	2.34
Hs.80905	Ras association (RalGDS/AF-6) domain family 2	RASSF2	9770	20pter-p12.1			2.85e-05	8.37	4.7e-08	8.65	1.6e-07	7.73
Hs.81170	pim-1 oncogene	PIM1	5292	6p21.2													0.000373	-2.77778
Hs.81248	CUG triplet repeat, RNA binding protein 1	CUGBP1	10658	11p11									0.000445	-3.57143
Hs.81361	heterogeneous nuclear ribonucleoprotein A/B	HNRPAB	3182	5q35.3			0.000767	2.17	0.000565	2.31	0.000367	2.18
Hs.8146	translocation protein 1	TLOC1	7095	3q26.2-q27									0.000929	-2.7027			0.000351	-3.33333
Hs.81648	hypothetical protein FLJ11021 similar to splicing factor, arginine/serine-rich 4	FLJ11021	65117	12q24.31													0.000543	-1.5625
Hs.81884	sulfotransferase family, cytosolic, 2A, dehydroepiandrosterone (DHEA) -preferring, member 1	SULT2A1	6822	19q13.3									8.76e-05	1.74
Hs.81942	polymerase (DNA-directed), alpha (70kD)	POLA2	23649	11q12.3					0.000114	2.84	5.86e-05	2.76
Hs.81988	disabled homolog 2, mitogen-responsive phosphoprotein (Drosophila)	DAB2	1601	5p13	0.000195	-7.69231	2.48e-06	-12.5	3.29e-05	-7.14286	1.03e-06	-8.33333					9.15e-05	-3.44828
Hs.82001	polycystic kidney disease 2 (autosomal dominant)	PKD2	5311	4q21-q23			9.98e-06	-8.33333	8.04e-05	-7.69231	1.74e-05	-7.14286
Hs.82007	methionyl aminopeptidase 1	METAP1	23173	4q22.3					1.36e-05	2.78	1.08e-05	2.7
Hs.82042	solute carrier family 23 (nucleobase transporters), member 1	SLC23A1	9962	20p13					1.21e-05	-2.77778	0.000251	-2.7027
Hs.82065	interleukin 6 signal transducer (gp130, oncostatin M receptor)	IL6ST	3572	5q11			4.01e-06	-4
Hs.82112	interleukin 1 receptor, type I	IL1R1	3554	2q12			0.000141	-5.88235									0.000172	-9.09091
Hs.82173	TGFB inducible early growth response	TIEG	7071	8q22.2			0.000118	-5
Hs.82210	runt-related transcription factor binding protein 2	RUNXBP2	7994	8p11					0.000814	1.5
Hs.82273	hypothetical protein FLJ20152	FLJ20152	54463	5p15.1					0.000507	-2.12766
Hs.82283	5-methyltetrahydrofolate-homocysteine methyltransferase	MTR	4548	1q43													0.000443	-2
Hs.82295	dedicator of cyto-kinesis 1	DOCK1	1793	10q26.13-q26.3					0.000597	-1.72414
Hs.82353	protein C receptor, endothelial (EPCR)	PROCR	10544	20q11.2			2.61e-05	-7.69231	1.18e-07	-6.66667	3.29e-07	-6.66667
Hs.82547	retinoic acid receptor responder (tazarotene induced) 1	RARRES1	5918	3q25.32	7.37e-05	-11.1111	1.75e-07	-16.6667	2.22e-06	-7.69231	2.69e-08	-10
Hs.82568	cytochrome P450, family 27, subfamily A, polypeptide 1	CYP27A1	1593	2q33-qter			0.000593	-2.5641	0.000136	-2.5641	4.12e-05	-2.43902
Hs.82887	protein phosphatase 1, regulatory (inhibitor) subunit 11	PPP1R11	6992	6p21.3															0.000603	-1.69492
Hs.82890	defender against cell death 1	DAD1	1603	14q11-q12															0.000139	-4.7619
Hs.82916	chaperonin containing TCP1, subunit 6A (zeta 1)	CCT6A	908	7p11.1													0.0004	-2.5
Hs.82927	adenosine monophosphate deaminase 2 (isoform L)	AMPD2	271	1p13.3									0.000579	-1.88679
Hs.83077	interleukin 18 (interferon-gamma-inducing factor)	IL18	3606	11q22.2-q22.3			0.000682	-2
Hs.83384	S100 calcium binding protein, beta (neural)	S100B	6285	21q22.3									0.000352	3.56
Hs.83765	dihydrofolate reductase	DHFR	1719	5q11.2-q13.2									0.00033	1.76
Hs.83790	endosome-associated FYVE-domain protein	ENDOFIN	9765	5p15.2-q14.3													0.000185	-2.38095
Hs.83834	cytochrome b-5	CYB5	1528	18q23													7.7e-05	-3.0303	1.86e-05	-2.7027
Hs.83920	peptidylglycine alpha-amidating monooxygenase	PAM	5066	5q14-q21													0.000148	-3.7037	6.67e-05	-3.7037
Hs.84152	cystathionine-beta-synthase	CBS	875	21q22.3			0.000162	3.7
Hs.845	interleukin 13	IL13	3596	5q31									0.000453	3.08
Hs.85004	centromere protein B, 80kDa	CENPB	1059	20p13			0.000228	-3.84615
Hs.85146	v-ets erythroblastosis virus E26 oncogene homolog 2 (avian)	ETS2	2114	21q22.2													0.000491	-4.16667	0.000869	-4
Hs.85226	lipase A, lysosomal acid, cholesterol esterase (Wolman disease)	LIPA	3988	10q23.2-q23.3			0.000711	-3.22581									0.000112	-2.5
Hs.858	v-rel reticuloendotheliosis viral oncogene homolog B, nuclear factor of kappa light polypeptide gene enhancer in B-cells 3 (avian)	RELB	5971	19q13.32	3.54e-07	6.01	6.53e-06	5.6	2.78e-06	5.84	4.9e-09	5.81
Hs.85969	hypothetical protein FLJ12270	FLJ12270	79726	16q22.3													0.000201	-2.5641
Hs.861	mitogen-activated protein kinase 3	MAPK3	5595	16p12-p11.2													0.000606	-2.7027	0.00063	-2.43902
Hs.86172	paired related homeobox protein	PRX2	51450	9q34.1	0.000133	4.34
Hs.8700	deleted in liver cancer 1	DLC1	10395	8p22-p21.3													0.000886	-3.57143
Hs.87205	lymphocyte antigen 64 homolog, radioprotective 105kDa (mouse)	LY64	4064	5q12									0.000423	2.12
Hs.8768	hypothetical protein FLJ10849	FLJ10849	55752	4q21.21			3.63e-05	-2.12766	7.95e-05	-1.75439	0.000962	-1.81818
Hs.8786	carbohydrate (N-acetylglucosamine-6-O) sulfotransferase 2	CHST2	9435	3q24									0.000975	3.28
Hs.87912	Homo sapiens cDNA FLJ39779 fis, clone SPLEN2001945.												0.000526	2.02
Hs.88474	prostaglandin-endoperoxide synthase 1 (prostaglandin G/H synthase and cyclooxygenase)	PTGS1	5742	9q32-q33.3															9.24e-05	-3.0303
Hs.8867	cysteine-rich, angiogenic inducer, 61	CYR61	3491	1p31-p22													0.000412	-12.5	0.000252	-9.09091
Hs.89040	prepronociceptin	PNOC	5368	8p21	4.32e-05	-11.1111
Hs.89230	potassium intermediate/small conductance calcium-activated channel, subfamily N, member 3	KCNN3	3782	1q21.3									0.000603	1.6
Hs.89394	POU domain, class 1, transcription factor 1 (Pit1, growth hormone factor 1)	POU1F1	5449	3p11									0.000336	2			4.68e-05	2.11
Hs.89404	msh homeo box homolog 2 (Drosophila)	MSX2	4488	5q34-q35			0.000754	3.03	6.52e-07	3.06	5.65e-10	3.08
Hs.89457	collagen, type XIX, alpha 1	COL19A1	1310	6q12-q13									0.000116	3.04
Hs.89476	CD2 antigen (p50), sheep red blood cell receptor	CD2	914	1p13					3.17e-06	2.9	0.000204	2.61
Hs.89560	iduronidase, alpha-L-	IDUA	3425	4p16.3									0.000466	3.15
Hs.89584	insulinoma-associated 1	INSM1	3642	20p11.2					9.34e-06	3.97	2.93e-06	3.55
Hs.89591	Kallmann syndrome 1 sequence	KAL1	3730	Xp22.32							0.000869	-1.81818	3.44e-05	2.41			0.000671	1.97	0.000269	1.92
Hs.89605	cholinergic receptor, nicotinic, alpha polypeptide 3	CHRNA3	1136	15q24													0.000482	2.1
Hs.89631	ryanodine receptor 1 (skeletal)	RYR1	6261	19q13.1			0.000899	1.79	0.000839	1.76	0.000144	1.71
Hs.89643	transketolase (Wernicke-Korsakoff syndrome)	TKT	7086	3p14.3			0.000476	2.88	0.000682	2.82	0.000205	2.86
Hs.89666	A kinase (PRKA) anchor protein 6	AKAP6	9472	14q12									1.79e-05	3.12			0.000232	2.42
Hs.89717	carboxypeptidase A2 (pancreatic)	CPA2	1358	7q32													0.000782	1.75	0.000375	1.71
Hs.89718	spermine synthase	SMS	6611	Xp22.1					0.00078	2.32
Hs.89771	glucokinase (hexokinase 4) regulatory protein	GCKR	2646	2p23									6.78e-05	1.72
Hs.8980	testis-specific kinase 2	TESK2	10420	1p32									0.000826	2.31
Hs.8982	KIAA1395 protein	KIAA1395	57572	19p13.2			0.00049	5.34
Hs.89868	KIAA0062 protein	KIAA0062	23516	8p21.2															0.000139	-10
Hs.89925	calcium channel, voltage-dependent, L type, alpha 1C subunit	CACNA1C	775	12p13.3					0.000636	-1.5873
Hs.90061	progesterone receptor membrane component 1	PGRMC1	10857	Xq22-q24															0.000494	-4.16667
Hs.90250	Homo sapiens cDNA FLJ36413 fis, clone THYMU2010816.																		0.000608	-2.17391
Hs.90419	KIAA0882 protein	KIAA0882	23158	4q31.1													0.000492	-1.66667
Hs.9052	hypothetical protein LOC283578	LOC283578	283578	14q24.3									0.000147	-3.125
Hs.90691	nucleophosmin/nucleoplasmin, 3	NPM3	10360	10q24.31					7.03e-05	2.44	0.000205	2.27
Hs.90869	DEAH-box RNA/DNA helicase AAM73547	LOC90957	90957	2p22.2									0.000218	2.64
Hs.91103	hypothetical protein MGC4293	MGC4293	83475	19p13.3					0.000283	2.5	0.000287	2.52
Hs.91343	gamma-aminobutyric acid (GABA) A receptor, alpha 2	GABRA2	2555	4p12									0.000391	3.79			0.000668	2.61
Hs.91521	hypothetical protein DKFZP761M1511	DKFZP761M1511	54492	5q35.2					0.000586	2.05			0.000593	2.56
Hs.91586	transmembrane 9 superfamily member 1	TM9SF1	10548	14q11.2															0.000925	-2.08333
Hs.92282	paired-like homeodomain transcription factor 2	PITX2	5308	4q25-q27									0.000845	2.45
Hs.923	single-stranded DNA binding protein	SSBP1	6742	7q34			0.000571	2.2	7.95e-05	2.25	0.000121	2.13
Hs.92384	vitamin A responsive; cytoskeleton related	JWA	10550	3p14													0.000155	-3.44828	0.000868	-2.85714
Hs.9247	protein kinase, AMP-activated, alpha 1 catalytic subunit	PRKAA1	5562	5p12					1.41e-07	7.46	1.12e-05	6.49
Hs.929	myosin, heavy polypeptide 7, cardiac muscle, beta	MYH7	4625	14q12	0.000745	3.76	6.33e-06	3.31	6.76e-06	2.97	3.24e-07	3.21
Hs.93177	interferon, beta 1, fibroblast	IFNB1	3456	9p21									2.31e-06	2.3
Hs.93199	lanosterol synthase (2,3-oxidosqualene-lanosterol cyclase)	LSS	4047	21q22.3			0.000439	-2.5	0.000107	-2.38095	4.68e-05	-2.32558
Hs.93213	BCL2-antagonist/killer 1	BAK1	578	6p21.3					0.000909	1.82
Hs.93780	ESTs, Moderately similar to hypothetical protein FLJ20378 [Homo sapiens] [H.sapiens]						0.000973	3.25
Hs.93868	PHD finger protein 2	PHF2	5253	9q22.31									0.0009	-3.22581
Hs.93913	interleukin 6 (interferon, beta 2)	IL6	3569	7p21													4.1e-05	-2.85714	0.000253	-2.5
Hs.94498	leukocyte immunoglobulin-like receptor, subfamily A (with TM domain), member 2	LILRA2	11027	19q13.4			6.64e-05	-2.04082
Hs.94672	GCN5 general control of amino-acid synthesis 5-like 1 (yeast)	GCN5L1	2647	12q13-q14					0.000978	1.94
Hs.94790	ProSAPiP2 protein	ProSAPiP2	9755	17q21.32									0.000718	2.08
Hs.94986	ribonuclease P (38kD)	RPP38	10557	10p13			6.27e-06	5.79			0.000198	5.29
Hs.95097	ESTs						6.11e-05	4.08
Hs.95140	START domain containing 8	STARD8	9754	Xq12													0.000649	1.52
Hs.952	solute carrier family 10 (sodium/bile acid cotransporter family), member 1	SLC10A1	6554	14q24.1									0.000168	3.64
Hs.9520	formyltetrahydrofolate dehydrogenase	FTHFD	10840	3q21.2	0.000711	3.85
Hs.95424	mitogen-activated protein kinase kinase kinase kinase 1	MAP4K1	11184	19q13.1-q13.4			0.000196	5.79	2.04e-07	4.81	3.39e-06	4.95
Hs.95583	transmembrane 4 superfamily member tetraspan NET-7	NET-7	23555	10q22.1					2.31e-05	4.66	0.000275	4.43
Hs.9567	EMSY protein	C11ORF30	56946	11q13.3									0.000137	2.24
Hs.95734	uridine monophosphate kinase	UMPK	7371	1q23					2.97e-05	3.75	1e-05	3.69
Hs.96063	insulin receptor substrate 1	IRS1	3667	2q36	0.000108	2.96			0.000458	3.19	0.000411	2.92
Hs.96149	nuclear factor of activated T-cells, cytoplasmic, calcineurin-dependent 1	NFATC1	4772	18q23									4.46e-05	1.59
Hs.96398	8-oxoguanine DNA glycosylase	OGG1	4968	3p26.2									3.68e-05	2.1
Hs.9645	tankyrase 1 binding protein 1, 182kDa	TNKS1BP1	85456	11q11									2.48e-06	-2.77778
Hs.96593	ras homolog gene family, member F (in filopodia)	ARHF	54509	12q24.31			0.00018	2.83			0.00018	2.92
Hs.96870	staufen, RNA binding protein, homolog 2 (Drosophila)	STAU2	27067	8q13-q21.1					0.000112	2.6			9.16e-07	3.14
Hs.9700	cyclin E1	CCNE1	898	19q12			1.34e-06	9.6	1.5e-07	8.64	1.44e-07	8.94
Hs.9729	KIAA0239 protein	KIAA0239	23338	5q31.1									0.000239	-6.25
Hs.9731	nuclear factor of kappa light polypeptide gene enhancer in B-cells inhibitor, beta	NFKBIB	4793	19q13.1			0.000494	3.02	8.22e-07	3.13	3.74e-06	2.91
Hs.97375	H.sapiens gene from PAC 106H8.												0.000585	3.45			0.000494	2.38	0.000874	2.31
Hs.97633	A kinase (PRKA) anchor protein 4	AKAP4	8852	Xp11.2									0.000439	2.89
Hs.97927	similar to MOB-LAK	LOC148932	148932	1p33			0.000555	-2.94118
Hs.98484	hypothetical protein MGC50831	MGC50831	286676	3q13.33													0.000983	2.35
Hs.98485	gap junction protein, beta 3, 31kDa (connexin 31)	GJB3	2707	1p34			7.61e-05	7.3	3.29e-05	7.77	9.08e-05	7.02
Hs.98547	amiloride-sensitive cation channel 3, testis	ACCN3	9311	7q35			0.000998	2.67
Hs.9877	nucleoporin 62kDa	NUP62	23636	19q13.33													0.000905	1.78
Hs.9880	peptidyl prolyl isomerase H (cyclophilin H)	PPIH	10465	1p34.1			0.000466	1.98
Hs.9887	Homo sapiens cDNA FLJ36309 fis, clone THYMU2004986.																0.000222	-3.0303	0.000141	-2.7027
Hs.99636	Homo sapiens cDNA FLJ12563 fis, clone NT2RM4000820, weakly similar to VACUOLAR ATP SYNTHASE SUBUNIT AC45 PRECURSOR (EC 3.6.1.34).																0.000253	-1.96078	0.000139	-2.04082
Hs.99875	zona pellucida binding protein	ZPBP	11055	7p14.3	9.31e-05	6.18			7.44e-06	8.06	5.32e-06	8.03
Hs.99886	complement component 4 binding protein, beta	C4BPB	725	1q32									0.000352	2.8
Hs.99899	tumor necrosis factor (ligand) superfamily, member 7	TNFSF7	970	19p13			2.33e-05	3.41	1.58e-11	3.2	1.77e-06	3.17
Hs.99971	zinc finger protein 272	ZNF272	10794	19q13.4									0.000112	-2.12766
Hs.99975	cholinergic receptor, nicotinic, delta polypeptide	CHRND	1144	2q33-q34	2.1e-05	5.6	1.38e-05	5.91	1.26e-08	4.97	1.25e-10	5.35
